# Supplementary material for: Sleep-wake patterns of fencing athletes: a long-term wearable device study
Source: PeerJ. 2025 Jan 14;13:e18812. doi: 10.7717/peerj.18812 (PMC11740734; doi:10.7717/peerj.18812)
Supplement: Supplemental Information 1 [file peerj-13-18812-s001.xlsx]

## Sheet: Sleep information for Athletes
ID	date time	Date of sleep	sleep onset time	Date of wake-up	wake-up time	deep sleep duration(min)	light sleep duration(min)	REM duration(min)	awake duration(min)	nap duration	total sleep duration(min)
hif007	2022-04-27	2022-04-27	00:25:00	2022-04-27	06:59:00	110	207	77	0	195	589
hif007	2022-04-28	2022-04-28	00:29:00	2022-04-28	08:49:00	129	240	81	50	79	529
hif007	2022-04-29	2022-04-29	00:08:00	2022-04-29	06:59:00	113	247	33	18	104	497
hif007	2022-04-30	2022-04-30	00:34:00	2022-04-30	08:48:00	144	196	98	56	0	438
hif007	2022-04-30	2022-04-30	00:46:00	2022-04-30	06:59:00	115	149	103	6	79	446
hif007	2022-05-01	2022-05-01	03:09:00	2022-05-01	11:27:00	137	268	93	0	0	498
hif008	2022-04-27	2022-04-26	23:42:00	2022-04-27	07:11:00	178	181	90	0	278	727
hif008	2022-04-28	2022-04-28	00:59:00	2022-04-28	08:41:00	166	176	78	42	121	541
hif008	2022-04-29	2022-04-29	01:40:00	2022-04-29	07:12:00	105	147	80	0	125	457
hif008	2022-04-30	2022-04-30	00:46:00	2022-04-30	06:59:00	115	149	103	6	79	446
hjf001	2022-04-04	2022-04-04	00:09:00	2022-04-04	07:20:00	159	193	62	17	82	496
hjf001	2022-04-05	2022-04-04	23:59:00	2022-04-05	07:11:00	126	200	100	6	96	522
hjf001	2022-04-06	2022-04-05	23:17:00	2022-04-06	07:20:00	138	242	91	12	81	552
hjf001	2022-04-07	2022-04-07	00:22:00	2022-04-07	07:20:00	69	216	105	28	82	472
hjf001	2022-04-08	2022-04-08	00:02:00	2022-04-08	07:17:00	107	206	117	5	21	451
hjf001	2022-04-09	2022-04-08	23:50:00	2022-04-09	07:20:00	118	267	63	2	43	491
hjf001	2022-04-10	2022-04-10	01:13:00	2022-04-10	07:25:00	130	172	70	0	0	372
hjf001	2022-04-11	2022-04-11	00:20:00	2022-04-11	07:18:00	66	218	126	8	57	467
hjf001	2022-04-12	2022-04-12	00:07:00	2022-04-12	07:21:00	71	231	132	0	86	520
hjf001	2022-04-13	2022-04-12	23:56:00	2022-04-13	07:21:00	104	219	122	0	82	527
hjf001	2022-04-14	2022-04-13	23:52:00	2022-04-14	07:20:00	89	242	112	5	52	495
hjf001	2022-04-15	2022-04-14	23:58:00	2022-04-15	07:12:00	103	221	110	0	58	492
hjf001	2022-04-16	2022-04-16	00:06:00	2022-04-16	07:19:00	107	194	110	22	79	490
hjf001	2022-04-17	2022-04-16	22:28:00	2022-04-17	09:22:00	140	285	146	83	36	607
hjf001	2022-04-18	2022-04-18	00:40:00	2022-04-18	06:50:00	76	196	90	8	73	435
hjf001	2022-04-19	2022-04-18	23:41:00	2022-04-19	08:23:00	128	266	86	42	111	591
hjf001	2022-04-20	2022-04-19	23:55:00	2022-04-20	06:51:00	103	244	63	6	80	490
hjf001	2022-04-21	2022-04-20	23:50:00	2022-04-21	08:12:00	116	230	77	79	79	502
hjf001	2022-04-22	2022-04-22	00:31:00	2022-04-22	06:57:00	106	202	69	9	88	465
hjf001	2022-04-23	2022-04-22	23:53:00	2022-04-23	08:37:00	111	275	96	42	72	554
hjf001	2022-04-24	2022-04-23	23:59:00	2022-04-24	07:22:00	109	257	77	0	73	516
hjf001	2022-04-25	2022-04-25	00:49:00	2022-04-25	06:57:00	101	208	59	0	150	518
hjf001	2022-04-26	2022-04-26	00:01:00	2022-04-26	08:09:00	140	227	66	55	57	490
hjf001	2022-04-27	2022-04-26	23:28:00	2022-04-27	07:21:00	153	204	113	3	65	535
hjf001	2022-04-28	2022-04-28	00:10:00	2022-04-28	07:21:00	158	182	89	2	88	517
hjf001	2022-04-29	2022-04-28	23:25:00	2022-04-29	07:19:00	161	206	87	20	93	547
hjf001	2022-04-30	2022-04-30	00:01:00	2022-04-30	07:19:00	151	187	97	3	17	452
hjf001	2022-04-30	2022-04-30	00:01:00	2022-04-30	07:19:00	151	187	97	3	17	452
hjf001	2022-05-01	2022-05-01	00:08:00	2022-05-01	08:27:00	162	201	122	14	0	485
hjf001	2022-05-02	2022-05-02	00:26:00	2022-05-02	07:19:00	87	201	115	10	98	501
hjf001	2022-05-03	2022-05-02	23:55:00	2022-05-03	07:19:00	121	190	123	10	126	560
hjf001	2022-05-04	2022-05-04	00:31:00	2022-05-04	07:21:00	125	185	100	0	81	491
hjf001	2022-05-05	2022-05-05	00:06:00	2022-05-05	07:15:00	132	216	73	8	102	523
hjf001	2022-05-06	2022-05-05	23:48:00	2022-05-06	07:19:00	168	188	89	6	32	477
hjf001	2022-05-07	2022-05-06	23:52:00	2022-05-07	07:18:00	160	183	96	7	0	439
hjf001	2022-05-08	2022-05-08	00:43:00	2022-05-08	08:22:00	71	254	134	0	31	490
hjf001	2022-05-09	2022-05-09	00:43:00	2022-05-09	07:19:00	97	203	92	4	98	490
hjf001	2022-05-10	2022-05-10	00:22:00	2022-05-10	07:19:00	143	173	98	3	126	540
hjf001	2022-05-11	2022-05-11	00:35:00	2022-05-11	07:19:00	147	163	94	0	58	462
hjf001	2022-05-12	2022-05-12	00:18:00	2022-05-12	07:21:00	99	213	103	8	56	471
hjf001	2022-05-13	2022-05-12	23:43:00	2022-05-13	10:04:00	142	351	92	36	0	585
hjf001	2022-05-14	2022-05-14	00:18:00	2022-05-14	07:20:00	94	253	75	0	26	448
hjf001	2022-05-16	2022-05-16	00:06:00	2022-05-16	08:28:00	160	213	108	21	63	544
hjf001	2022-05-17	2022-05-17	00:15:00	2022-05-17	07:19:00	71	229	124	0	125	549
hjf001	2022-05-18	2022-05-18	00:07:00	2022-05-18	08:27:00	129	217	142	12	97	585
hjf001	2022-05-19	2022-05-19	00:25:00	2022-05-19	07:16:00	138	177	96	0	101	512
hjf001	2022-05-20	2022-05-20	00:09:00	2022-05-20	08:13:00	124	261	94	5	30	509
hjf001	2022-05-21	2022-05-21	00:08:00	2022-05-21	07:19:00	101	251	75	4	88	515
hjf001	2022-05-22	2022-05-22	00:31:00	2022-05-22	07:15:00	87	195	118	4	0	400
hjf001	2022-05-23	2022-05-23	00:27:00	2022-05-23	07:57:00	171	177	94	8	60	502
hjf001	2022-05-24	2022-05-24	00:19:00	2022-05-24	07:19:00	171	178	68	3	81	498
hjf001	2022-05-25	2022-05-25	00:17:00	2022-05-25	07:21:00	127	200	82	15	25	434
hjf001	2022-05-27	2022-05-27	00:37:00	2022-05-27	10:01:00	231	288	38	7	0	557
hjf001	2022-05-28	2022-05-28	00:17:00	2022-05-28	07:19:00	117	190	113	2	72	492
hjf001	2022-05-30	2022-05-30	01:01:00	2022-05-30	07:19:00	122	187	66	3	77	452
hjf001	2022-05-30	2022-05-30	01:01:00	2022-05-30	07:19:00	122	187	66	3	77	452
hjf001	2022-05-31	2022-05-31	00:20:00	2022-05-31	07:16:00	141	175	100	0	101	517
hjf001	2022-06-01	2022-06-01	00:18:00	2022-06-01	07:19:00	155	183	83	0	56	477
hjf001	2022-06-02	2022-06-01	23:46:00	2022-06-02	07:21:00	146	204	96	9	49	495
hjf001	2022-06-03	2022-06-03	00:09:00	2022-06-03	07:11:00	145	189	82	6	0	416
hjf001	2022-06-04	2022-06-03	23:30:00	2022-06-04	07:19:00	162	197	99	11	26	484
hjf001	2022-06-05	2022-06-04	23:39:00	2022-06-05	08:40:00	71	339	125	6	0	535
hjf001	2022-06-06	2022-06-06	00:57:00	2022-06-06	07:59:00	168	184	61	9	50	463
hjf001	2022-06-07	2022-06-06	23:33:00	2022-06-07	07:19:00	51	271	128	16	77	527
hjf001	2022-06-08	2022-06-07	23:43:00	2022-06-08	07:19:00	125	233	85	13	84	527
hjf001	2022-06-09	2022-06-09	00:28:00	2022-06-09	07:17:00	136	166	97	10	79	478
hjf001	2022-06-10	2022-06-10	00:08:00	2022-06-10	07:19:00	138	177	114	2	19	448
hjf001	2022-06-11	2022-06-11	00:08:00	2022-06-11	07:11:00	120	235	68	0	56	479
hjf001	2022-06-12	2022-06-12	00:32:00	2022-06-12	07:17:00	152	156	97	0	60	465
hjf001	2022-06-13	2022-06-13	00:05:00	2022-06-13	08:25:00	142	293	65	0	54	554
hjf001	2022-06-14	2022-06-13	23:45:00	2022-06-14	07:19:00	132	202	120	0	47	501
hjf001	2022-06-15	2022-06-15	00:04:00	2022-06-15	07:09:00	45	227	152	1	53	477
hjf001	2022-06-16	2022-06-16	00:19:00	2022-06-16	07:18:00	102	239	78	0	50	469
hjf001	2022-06-17	2022-06-17	00:56:00	2022-06-17	07:21:00	87	193	100	5	60	440
hjf001	2022-06-19	2022-06-19	00:40:00	2022-06-19	08:06:00	151	182	113	0	0	446
hjf001	2022-06-20	2022-06-19	23:37:00	2022-06-20	07:21:00	140	195	127	2	0	462
hjf001	2022-06-21	2022-06-20	23:55:00	2022-06-21	07:19:00	169	173	95	7	81	518
hjf001	2022-06-23	2022-06-22	23:50:00	2022-06-23	07:21:00	99	213	136	3	68	516
hjf001	2022-06-24	2022-06-24	00:30:00	2022-06-24	06:57:00	129	160	98	0	57	444
hjf001	2022-06-25	2022-06-24	23:48:00	2022-06-25	07:19:00	115	242	94	0	0	451
hjf001	2022-06-26	2022-06-26	00:01:00	2022-06-26	08:23:00	118	280	96	8	0	494
hjf001	2022-06-27	2022-06-27	00:24:00	2022-06-27	07:19:00	101	212	102	0	70	485
hjf001	2022-06-28	2022-06-28	00:17:00	2022-06-28	07:20:00	89	224	110	0	38	461
hjf001	2022-06-29	2022-06-29	00:31:00	2022-06-29	07:21:00	105	201	104	0	27	437
hjf001	2022-06-30	2022-06-30	00:02:00	2022-06-30	07:19:00	165	185	79	8	58	487
hjf001	2022-06-30	2022-06-30	00:02:00	2022-06-30	07:19:00	165	185	79	8	58	487
hjf001	2022-07-01	2022-06-30	23:56:00	2022-07-01	04:58:00	59	187	51	5	35	332
hjf001	2022-07-02	2022-07-02	00:17:00	2022-07-02	07:19:00	69	226	127	0	105	527
hjf001	2022-07-04	2022-07-04	00:34:00	2022-07-04	07:19:00	33	229	141	2	85	488
hjf001	2022-07-05	2022-07-05	00:08:00	2022-07-05	07:26:00	83	201	143	11	108	535
hjf001	2022-07-06	2022-07-06	00:13:00	2022-07-06	07:19:00	127	258	36	5	25	446
hjf001	2022-07-07	2022-07-07	00:12:00	2022-07-07	07:19:00	122	202	103	0	34	461
hjf001	2022-07-08	2022-07-07	23:53:00	2022-07-08	08:45:00	129	253	114	36	0	496
hjf001	2022-07-09	2022-07-08	23:58:00	2022-07-09	08:44:00	142	206	132	46	110	590
hjf001	2022-07-10	2022-07-10	01:30:00	2022-07-10	08:50:00	135	182	106	17	122	545
hjf001	2022-07-11	2022-07-11	00:39:00	2022-07-11	07:11:00	137	166	89	0	60	452
hjf001	2022-07-12	2022-07-11	23:46:00	2022-07-12	06:59:00	113	204	109	7	114	540
hjf001	2022-07-13	2022-07-13	00:50:00	2022-07-13	07:01:00	96	164	111	0	54	425
hjf001	2022-07-14	2022-07-14	00:38:00	2022-07-14	07:07:00	101	243	45	0	0	389
hjf001	2022-07-15	2022-07-15	00:18:00	2022-07-15	07:19:00	121	225	75	0	151	572
hjf001	2022-07-16	2022-07-16	00:45:00	2022-07-16	07:11:00	130	176	80	0	0	386
hjf001	2022-07-18	2022-07-17	23:56:00	2022-07-18	08:41:00	102	267	107	49	51	527
hjf001	2022-07-19	2022-07-19	00:37:00	2022-07-19	08:42:00	106	206	134	39	35	481
hjf001	2022-07-20	2022-07-19	23:58:00	2022-07-20	08:15:00	135	206	113	43	32	486
hjf001	2022-07-21	2022-07-21	00:31:00	2022-07-21	08:27:00	159	191	87	39	68	505
hjf001	2022-07-22	2022-07-22	00:24:00	2022-07-22	08:40:00	140	219	101	36	32	492
hjf001	2022-07-23	2022-07-22	23:45:00	2022-07-23	07:12:00	155	184	104	4	0	443
hjf001	2022-07-24	2022-07-23	22:52:00	2022-07-24	08:31:00	133	260	171	15	0	564
hjf001	2022-07-25	2022-07-24	23:45:00	2022-07-25	08:43:00	140	263	73	62	101	577
hjf001	2022-07-26	2022-07-25	23:55:00	2022-07-26	07:12:00	114	199	101	23	98	512
hjf001	2022-07-27	2022-07-26	23:46:00	2022-07-27	07:14:00	158	225	65	0	65	513
hjf001	2022-07-28	2022-07-27	23:17:00	2022-07-28	07:14:00	70	240	145	22	123	578
hjf001	2022-07-29	2022-07-29	00:05:00	2022-07-29	07:09:00	151	183	90	0	59	483
hjf001	2022-07-30	2022-07-30	00:00:00	2022-07-30	07:04:00	147	175	102	0	77	501
hjf001	2022-07-30	2022-07-30	00:00:00	2022-07-30	07:04:00	147	175	102	0	0	424
hjf001	2022-07-31	2022-07-31	01:35:00	2022-07-31	08:22:00	98	197	107	5	0	402
hjf001	2022-08-01	2022-08-01	00:06:00	2022-08-01	06:58:00	139	185	85	3	109	518
hjf001	2022-08-02	2022-08-01	23:13:00	2022-08-02	07:14:00	159	213	109	0	103	584
hjf001	2022-08-04	2022-08-03	23:08:00	2022-08-04	06:10:00	107	188	127	0	74	496
hjf001	2022-08-05	2022-08-04	23:49:00	2022-08-05	07:12:00	126	196	117	4	127	566
hjf001	2022-08-06	2022-08-05	23:56:00	2022-08-06	07:12:00	146	187	103	0	0	436
hjf001	2022-08-07	2022-08-07	00:16:00	2022-08-07	08:59:00	94	324	102	3	0	520
hjf001	2022-08-08	2022-08-08	00:39:00	2022-08-08	07:15:00	136	177	78	5	89	480
hjf001	2022-08-09	2022-08-08	23:58:00	2022-08-09	07:14:00	97	211	128	0	53	489
hjf001	2022-08-10	2022-08-10	00:07:00	2022-08-10	07:14:00	119	214	94	0	79	506
hjf001	2022-08-11	2022-08-10	22:30:00	2022-08-11	05:39:00	81	212	133	3	0	426
hjf001	2022-08-12	2022-08-12	00:01:00	2022-08-12	07:14:00	104	232	88	9	65	489
hjf001	2022-08-13	2022-08-13	00:25:00	2022-08-13	08:30:00	108	255	78	44	28	469
hjf001	2022-08-15	2022-08-14	23:23:00	2022-08-15	07:14:00	133	223	115	0	132	603
hjf001	2022-08-16	2022-08-16	00:00:00	2022-08-16	07:14:00	98	233	93	10	44	468
hjf001	2022-08-17	2022-08-17	00:07:00	2022-08-17	07:04:00	107	225	85	0	128	545
hjf001	2022-08-18	2022-08-17	23:45:00	2022-08-18	07:14:00	121	211	117	0	69	518
hjf001	2022-08-19	2022-08-18	23:38:00	2022-08-19	08:41:00	154	250	94	45	117	615
hjf001	2022-08-20	2022-08-19	23:08:00	2022-08-20	08:39:00	60	301	166	44	95	622
hjf001	2022-08-21	2022-08-21	00:58:00	2022-08-21	09:57:00	80	320	136	3	46	582
hjf001	2022-08-22	2022-08-22	00:01:00	2022-08-22	08:40:00	105	237	132	45	0	474
hjf001	2022-08-23	2022-08-22	23:44:00	2022-08-23	07:59:00	125	270	70	30	43	508
hjf001	2022-08-24	2022-08-24	00:05:00	2022-08-24	08:37:00	126	287	93	6	39	545
hjf001	2022-08-25	2022-08-25	00:09:00	2022-08-25	07:14:00	101	210	114	0	140	565
hjf001	2022-08-26	2022-08-25	23:36:00	2022-08-26	08:39:00	119	305	79	40	129	632
hjf001	2022-08-27	2022-08-27	00:36:00	2022-08-27	08:41:00	77	267	102	39	111	557
hjf001	2022-08-28	2022-08-28	00:10:00	2022-08-28	06:01:00	115	177	56	3	0	348
hjf001	2022-08-29	2022-08-28	23:04:00	2022-08-29	07:14:00	189	193	108	0	0	490
hjf001	2022-08-30	2022-08-30	00:00:00	2022-08-30	07:39:00	121	235	103	0	74	533
hjf001	2022-08-31	2022-08-30	23:14:00	2022-08-31	05:59:00	165	180	46	14	37	428
hjf001	2022-09-01	2022-09-01	01:06:00	2022-09-01	07:57:00	85	210	116	0	0	411
hjf001	2022-09-02	2022-09-01	23:27:00	2022-09-02	06:02:00	109	216	70	0	53	448
hjf001	2022-09-03	2022-09-03	00:50:00	2022-09-03	04:15:00	45	121	39	0	0	205
hjf001	2022-09-04	2022-09-03	23:48:00	2022-09-04	09:27:00	166	267	126	20	33	592
hjf001	2022-09-05	2022-09-05	00:48:00	2022-09-05	07:52:00	102	205	117	0	55	479
hjf001	2022-09-08	2022-09-07	23:05:00	2022-09-08	07:16:00	158	250	82	1	66	556
hjf001	2022-09-09	2022-09-09	00:05:00	2022-09-09	07:49:00	126	229	109	0	106	570
hjf001	2022-09-10	2022-09-09	23:24:00	2022-09-10	07:12:00	163	195	110	0	0	468
hjf001	2022-09-11	2022-09-10	23:14:00	2022-09-11	08:14:00	189	217	111	23	0	517
hjf001	2022-09-13	2022-09-12	23:47:00	2022-09-13	07:16:00	132	230	87	0	93	542
hjf001	2022-09-14	2022-09-14	00:24:00	2022-09-14	07:54:00	147	193	105	5	73	518
hjf001	2022-09-15	2022-09-15	00:13:00	2022-09-15	07:14:00	102	199	113	7	49	463
hjf001	2022-09-16	2022-09-16	00:35:00	2022-09-16	08:53:00	134	278	58	28	100	570
hjf001	2022-09-17	2022-09-17	00:12:00	2022-09-17	07:14:00	145	192	83	2	68	488
hjf004	2022-04-04	2022-04-04	00:26:00	2022-04-04	07:19:00	88	169	48	108	92	397
hjf004	2022-04-05	2022-04-05	00:26:00	2022-04-05	07:19:00	122	223	68	0	96	509
hjf004	2022-04-06	2022-04-06	00:51:00	2022-04-06	07:16:00	108	208	69	0	162	547
hjf004	2022-04-07	2022-04-07	01:51:00	2022-04-07	07:16:00	79	182	64	0	26	351
hjf004	2022-04-08	2022-04-08	01:28:00	2022-04-08	07:17:00	131	140	78	0	164	513
hjf004	2022-04-09	2022-04-09	00:57:00	2022-04-09	07:20:00	98	219	66	0	87	470
hjf004	2022-04-11	2022-04-11	00:02:00	2022-04-11	07:16:00	111	253	70	0	99	533
hjf004	2022-04-12	2022-04-12	00:38:00	2022-04-12	07:19:00	102	203	96	0	115	516
hjf004	2022-04-13	2022-04-13	01:08:00	2022-04-13	07:16:00	52	204	112	0	173	541
hjf004	2022-04-14	2022-04-14	00:34:00	2022-04-14	07:26:00	124	224	64	0	112	524
hjf004	2022-04-16	2022-04-16	00:19:00	2022-04-16	07:16:00	106	183	105	23	0	394
hjf004	2022-04-17	2022-04-17	01:35:00	2022-04-17	09:32:00	192	176	107	2	0	475
hjf004	2022-04-18	2022-04-18	00:08:00	2022-04-18	06:56:00	106	239	63	0	35	443
hjf004	2022-04-19	2022-04-19	01:13:00	2022-04-19	08:49:00	109	242	54	51	30	435
hjf004	2022-04-20	2022-04-19	23:18:00	2022-04-20	06:56:00	147	254	57	0	83	541
hjf004	2022-04-21	2022-04-20	23:26:00	2022-04-21	06:55:00	168	164	116	1	127	575
hjf004	2022-04-22	2022-04-22	01:20:00	2022-04-22	06:51:00	95	178	58	0	109	440
hjf004	2022-04-23	2022-04-23	00:27:00	2022-04-23	06:56:00	104	196	89	0	76	465
hjf004	2022-04-24	2022-04-24	01:33:00	2022-04-24	09:33:00	162	183	114	21	111	570
hjf004	2022-04-25	2022-04-25	01:30:00	2022-04-25	07:14:00	89	190	54	11	0	333
hjf004	2022-04-26	2022-04-26	02:15:00	2022-04-26	08:17:00	102	191	29	40	100	422
hjf004	2022-04-27	2022-04-27	00:11:00	2022-04-27	11:37:00	140	346	136	0	0	622
hjf004	2022-04-28	2022-04-27	23:48:00	2022-04-28	07:17:00	148	186	115	0	117	566
hjf004	2022-04-29	2022-04-29	00:29:00	2022-04-29	07:17:00	164	160	84	0	160	568
hjf004	2022-04-30	2022-04-30	00:25:00	2022-04-30	07:17:00	152	175	85	0	0	412
hjf004	2022-04-30	2022-04-30	00:25:00	2022-04-30	07:17:00	152	175	85	0	0	412
hjf004	2022-05-01	2022-05-01	01:10:00	2022-05-01	08:37:00	164	219	64	0	113	560
hjf004	2022-05-02	2022-05-01	23:50:00	2022-05-02	07:21:00	165	185	101	0	92	543
hjf004	2022-05-03	2022-05-03	00:08:00	2022-05-03	07:18:00	159	179	92	0	105	535
hjf004	2022-05-05	2022-05-05	00:03:00	2022-05-05	07:19:00	146	203	87	0	0	436
hjf004	2022-05-06	2022-05-06	00:43:00	2022-05-06	07:20:00	111	218	68	0	101	498
hjf004	2022-05-07	2022-05-07	00:39:00	2022-05-07	07:19:00	111	211	78	0	19	419
hjf004	2022-05-09	2022-05-09	00:57:00	2022-05-09	07:18:00	115	173	93	0	154	535
hjf004	2022-05-10	2022-05-10	00:51:00	2022-05-10	08:37:00	131	246	89	0	19	485
hjf004	2022-05-11	2022-05-11	03:19:00	2022-05-11	12:39:00	131	286	72	0	0	489
hjf004	2022-05-12	2022-05-12	02:43:00	2022-05-12	07:19:00	80	145	51	0	124	400
hjf004	2022-05-13	2022-05-13	00:13:00	2022-05-13	11:30:00	204	359	114	0	0	677
hjf004	2022-05-14	2022-05-14	02:53:00	2022-05-14	07:21:00	86	126	56	0	21	289
hjf004	2022-05-15	2022-05-15	01:55:00	2022-05-15	07:53:00	132	152	74	0	85	443
hjf004	2022-05-16	2022-05-16	00:40:00	2022-05-16	07:22:00	147	157	98	0	151	553
hjf004	2022-05-17	2022-05-17	01:29:00	2022-05-17	07:21:00	110	162	80	0	166	518
hjf004	2022-05-18	2022-05-18	02:17:00	2022-05-18	09:25:00	148	214	66	0	53	481
hjf004	2022-05-19	2022-05-19	00:37:00	2022-05-19	07:21:00	147	165	92	0	98	502
hjf004	2022-05-20	2022-05-20	01:04:00	2022-05-20	09:18:00	116	287	91	0	0	494
hjf004	2022-05-21	2022-05-21	01:27:00	2022-05-21	07:02:00	83	185	67	0	67	402
hjf004	2022-05-22	2022-05-22	04:21:00	2022-05-22	13:30:00	129	326	69	25	0	524
hjf004	2022-05-23	2022-05-23	01:09:00	2022-05-23	09:39:00	137	266	107	0	44	554
hjf004	2022-05-24	2022-05-24	01:15:00	2022-05-24	07:08:00	96	161	96	0	101	454
hjf004	2022-05-25	2022-05-25	01:50:00	2022-05-25	09:54:00	136	251	97	0	0	484
hjf004	2022-05-27	2022-05-27	01:10:00	2022-05-27	09:31:00	125	274	101	1	81	581
hjf004	2022-05-28	2022-05-28	01:52:00	2022-05-28	08:39:00	83	253	59	12	112	507
hjf004	2022-05-29	2022-05-29	01:46:00	2022-05-29	10:11:00	134	280	91	0	0	505
hjf004	2022-05-29	2022-05-29	01:46:00	2022-05-29	10:11:00	134	280	91	0	0	505
hjf004	2022-06-02	2022-06-02	00:29:00	2022-06-02	07:21:00	121	224	67	0	85	497
hjf004	2022-06-03	2022-06-03	03:01:00	2022-06-03	08:39:00	115	144	79	0	0	338
hjf004	2022-06-04	2022-06-04	00:31:00	2022-06-04	07:19:00	102	190	70	46	35	397
hjf004	2022-06-06	2022-06-06	01:32:00	2022-06-06	08:22:00	144	154	112	0	173	583
hjf004	2022-06-07	2022-06-07	01:41:00	2022-06-07	07:21:00	104	186	48	2	124	462
hjf004	2022-06-08	2022-06-08	00:23:00	2022-06-08	08:02:00	120	258	73	8	112	563
hjf004	2022-06-09	2022-06-09	02:12:00	2022-06-09	07:20:00	98	115	93	2	0	306
hjf004	2022-06-10	2022-06-10	00:50:00	2022-06-10	10:42:00	149	325	118	0	0	592
hjf004	2022-06-11	2022-06-11	00:26:00	2022-06-11	07:19:00	105	211	97	0	86	499
hjf004	2022-06-12	2022-06-12	00:35:00	2022-06-12	09:33:00	154	294	90	0	0	538
hjf004	2022-06-13	2022-06-13	00:28:00	2022-06-13	08:48:00	153	271	73	3	0	497
hjf004	2022-06-14	2022-06-14	01:03:00	2022-06-14	07:21:00	93	226	59	0	48	426
hjf004	2022-06-15	2022-06-15	00:22:00	2022-06-15	08:51:00	119	322	68	0	27	536
hjf004	2022-06-16	2022-06-16	00:27:00	2022-06-16	07:12:00	71	240	94	0	68	473
hjf004	2022-06-18	2022-06-18	02:51:00	2022-06-18	07:21:00	86	115	69	0	59	329
hjf004	2022-06-20	2022-06-20	00:34:00	2022-06-20	07:22:00	154	206	48	0	75	483
hjf004	2022-06-21	2022-06-21	01:18:00	2022-06-21	07:20:00	94	166	102	0	0	362
hjf004	2022-06-24	2022-06-23	23:05:00	2022-06-24	07:19:00	158	199	90	47	237	684
hjf004	2022-06-25	2022-06-25	01:34:00	2022-06-25	09:02:00	108	286	47	7	47	488
hjf004	2022-06-26	2022-06-26	00:53:00	2022-06-26	08:37:00	114	233	117	0	0	464
hjf004	2022-06-29	2022-06-29	01:09:00	2022-06-29	08:23:00	183	202	49	0	39	473
hjf004	2022-06-30	2022-06-30	00:21:00	2022-06-30	07:19:00	176	183	59	0	98	516
hjf004	2022-06-30	2022-06-30	00:21:00	2022-06-30	07:19:00	176	183	59	0	98	516
hjf004	2022-07-01	2022-07-01	01:15:00	2022-07-01	09:08:00	105	290	69	9	41	505
hjf004	2022-07-05	2022-07-05	03:32:00	2022-07-05	11:37:00	178	190	100	17	0	468
hjf004	2022-07-17	2022-07-17	00:14:00	2022-07-17	09:28:00	183	277	94	0	85	639
hjf004	2022-08-02	2022-08-02	00:08:00	2022-08-02	07:21:00	115	235	83	0	67	500
hjf004	2022-08-03	2022-08-02	23:40:00	2022-08-03	07:19:00	96	218	145	0	115	574
hjf005	2022-04-04	2022-04-04	00:35:00	2022-04-04	12:44:00	234	301	139	9	0	674
hjf005	2022-04-05	2022-04-05	00:11:00	2022-04-05	07:25:00	110	246	73	5	127	556
hjf005	2022-04-06	2022-04-06	01:04:00	2022-04-06	07:26:00	110	201	71	0	298	680
hjf005	2022-04-07	2022-04-07	00:03:00	2022-04-07	07:26:00	132	204	107	0	116	559
hjf005	2022-04-08	2022-04-08	00:30:00	2022-04-08	11:22:00	181	302	124	0	0	607
hjf005	2022-04-09	2022-04-08	23:58:00	2022-04-09	07:25:00	126	240	81	0	143	590
hjf005	2022-04-10	2022-04-10	02:18:00	2022-04-10	12:37:00	157	358	103	1	0	618
hjf005	2022-04-11	2022-04-11	00:53:00	2022-04-11	12:42:00	217	347	73	9	0	637
hjf005	2022-04-12	2022-04-12	00:38:00	2022-04-12	07:23:00	121	211	72	1	147	551
hjf005	2022-04-13	2022-04-13	00:49:00	2022-04-13	11:23:00	215	242	121	56	80	658
hjf005	2022-04-14	2022-04-14	00:57:00	2022-04-14	07:20:00	117	175	91	0	105	488
hjf005	2022-04-15	2022-04-15	00:10:00	2022-04-15	08:16:00	121	263	80	22	152	616
hjf005	2022-04-16	2022-04-16	00:30:00	2022-04-16	07:22:00	113	227	70	2	99	509
hjf005	2022-04-17	2022-04-17	01:56:00	2022-04-17	14:58:00	201	412	166	3	0	779
hjf005	2022-04-18	2022-04-18	01:12:00	2022-04-18	12:59:00	189	290	128	0	0	607
hjf005	2022-04-19	2022-04-19	00:08:00	2022-04-19	08:49:00	122	285	82	32	159	648
hjf005	2022-04-20	2022-04-20	00:10:00	2022-04-20	13:06:00	212	290	191	0	0	693
hjf005	2022-04-21	2022-04-21	00:58:00	2022-04-21	08:10:00	115	219	74	24	104	512
hjf005	2022-04-22	2022-04-22	00:39:00	2022-04-22	07:01:00	104	218	57	3	245	624
hjf005	2022-04-23	2022-04-23	00:30:00	2022-04-23	08:12:00	137	231	70	24	113	551
hjf005	2022-04-24	2022-04-24	05:10:00	2022-04-24	16:12:00	205	263	141	15	85	694
hjf005	2022-04-25	2022-04-25	01:28:00	2022-04-25	11:09:00	213	284	52	32	0	549
hjf005	2022-04-26	2022-04-26	00:45:00	2022-04-26	08:17:00	111	244	74	23	125	554
hjf005	2022-04-27	2022-04-27	00:46:00	2022-04-27	13:15:00	209	330	164	0	0	703
hjf005	2022-04-28	2022-04-28	00:30:00	2022-04-28	07:24:00	122	210	82	0	178	592
hjf005	2022-04-29	2022-04-29	00:57:00	2022-04-29	11:25:00	177	298	122	31	0	597
hjf005	2022-04-30	2022-04-30	00:21:00	2022-04-30	08:44:00	136	286	42	39	56	520
hjf005	2022-04-30	2022-04-30	00:21:00	2022-04-30	08:44:00	136	286	42	39	56	520
hjf005	2022-05-01	2022-05-01	01:51:00	2022-05-01	12:49:00	243	276	137	2	0	656
hjf005	2022-05-02	2022-05-02	00:43:00	2022-05-02	12:39:00	214	322	131	0	57	724
hjf005	2022-05-03	2022-05-03	01:25:00	2022-05-03	08:44:00	120	202	94	23	113	529
hjf005	2022-05-04	2022-05-04	01:33:00	2022-05-04	12:14:00	167	320	94	1	0	581
hjf005	2022-05-05	2022-05-05	00:46:00	2022-05-05	07:24:00	124	233	37	4	145	539
hjf005	2022-05-06	2022-05-06	01:12:00	2022-05-06	11:50:00	142	299	117	14	0	558
hjf005	2022-05-07	2022-05-07	00:37:00	2022-05-07	07:24:00	143	172	92	0	66	473
hjf005	2022-05-08	2022-05-08	02:57:00	2022-05-08	10:07:00	165	175	89	1	0	429
hjf005	2022-05-09	2022-05-09	01:04:00	2022-05-09	12:55:00	198	372	75	4	0	645
hjf005	2022-05-10	2022-05-09	23:50:00	2022-05-10	07:26:00	132	233	80	11	190	635
hjf005	2022-05-11	2022-05-11	00:33:00	2022-05-11	09:26:00	138	266	126	3	98	628
hjf005	2022-05-12	2022-05-12	01:16:00	2022-05-12	07:26:00	90	210	61	9	145	506
hjf005	2022-05-13	2022-05-13	01:24:00	2022-05-13	11:20:00	165	320	106	5	0	591
hjf005	2022-05-14	2022-05-14	00:37:00	2022-05-14	08:48:00	117	256	66	52	65	504
hjf005	2022-05-15	2022-05-15	01:52:00	2022-05-15	12:55:00	182	349	128	4	0	659
hjf005	2022-05-16	2022-05-16	01:40:00	2022-05-16	12:57:00	252	283	142	0	0	677
hjf005	2022-05-17	2022-05-17	00:39:00	2022-05-17	07:24:00	112	195	88	10	156	551
hjf005	2022-05-18	2022-05-18	00:08:00	2022-05-18	10:03:00	149	331	99	16	0	579
hjf005	2022-05-19	2022-05-19	00:38:00	2022-05-19	08:19:00	117	235	86	23	138	576
hjf005	2022-05-20	2022-05-20	00:25:00	2022-05-20	09:13:00	168	239	120	1	81	608
hjf005	2022-05-21	2022-05-21	00:38:00	2022-05-21	07:26:00	168	159	81	0	0	408
hjf005	2022-05-22	2022-05-22	04:21:00	2022-05-22	13:57:00	129	288	146	13	116	679
hjf005	2022-05-23	2022-05-23	01:17:00	2022-05-23	10:58:00	178	359	37	7	43	617
hjf005	2022-05-24	2022-05-24	00:22:00	2022-05-24	07:25:00	123	221	79	0	213	636
hjf005	2022-05-26	2022-05-26	01:05:00	2022-05-26	11:07:00	165	316	120	1	60	661
hjf005	2022-05-27	2022-05-27	02:20:00	2022-05-27	11:22:00	167	326	48	1	0	541
hjf005	2022-05-28	2022-05-28	00:55:00	2022-05-28	18:15:00	165	347	94	2	42	648
hjf005	2022-05-29	2022-05-29	02:27:00	2022-05-29	12:23:00	145	312	139	0	0	596
hjf005	2022-05-30	2022-05-30	02:13:00	2022-05-30	13:21:00	178	384	98	8	63	723
hjf005	2022-05-30	2022-05-30	02:13:00	2022-05-30	13:21:00	178	384	98	8	63	723
hjf005	2022-05-31	2022-05-31	01:42:00	2022-05-31	07:20:00	89	175	73	1	242	579
hjf005	2022-06-01	2022-06-01	01:22:00	2022-06-01	11:03:00	158	321	102	0	105	686
hjf005	2022-06-02	2022-06-02	01:31:00	2022-06-02	07:25:00	107	172	75	0	106	460
hjf005	2022-06-03	2022-06-03	00:51:00	2022-06-03	11:50:00	205	335	118	1	0	658
hjf005	2022-06-05	2022-06-05	02:03:00	2022-06-05	09:53:00	113	239	117	1	0	469
hjf005	2022-06-06	2022-06-06	01:13:00	2022-06-06	12:50:00	164	404	105	24	0	673
hjf005	2022-06-08	2022-06-08	01:34:00	2022-06-08	12:01:00	185	325	112	5	0	622
hjf005	2022-06-09	2022-06-09	00:48:00	2022-06-09	07:26:00	121	231	46	0	123	521
hjf005	2022-06-10	2022-06-10	01:20:00	2022-06-10	11:22:00	162	319	108	13	0	589
hjf005	2022-06-11	2022-06-11	02:05:00	2022-06-11	07:13:00	118	120	70	0	103	411
hjf005	2022-06-12	2022-06-12	01:10:00	2022-06-12	08:56:00	134	247	85	0	0	466
hjf005	2022-06-13	2022-06-13	00:46:00	2022-06-13	10:39:00	156	346	91	0	104	697
hjf005	2022-06-14	2022-06-14	00:39:00	2022-06-14	07:22:00	124	203	76	0	142	545
hjf005	2022-06-15	2022-06-15	01:03:00	2022-06-15	10:36:00	224	234	111	4	0	569
hjf005	2022-06-16	2022-06-15	23:47:00	2022-06-16	07:24:00	165	188	104	0	0	457
hjf005	2022-06-17	2022-06-17	01:17:00	2022-06-17	10:58:00	161	310	110	0	0	581
hjf005	2022-06-19	2022-06-19	01:11:00	2022-06-19	10:18:00	164	287	96	0	0	547
hjf005	2022-06-20	2022-06-20	00:53:00	2022-06-20	07:25:00	111	202	79	0	126	518
hjf005	2022-06-21	2022-06-21	00:13:00	2022-06-21	08:16:00	129	238	115	1	105	587
hjf005	2022-06-22	2022-06-22	00:07:00	2022-06-22	07:28:00	115	239	87	0	73	514
hjf005	2022-06-23	2022-06-23	00:18:00	2022-06-23	07:25:00	126	263	36	2	129	554
hjf005	2022-06-24	2022-06-24	01:33:00	2022-06-24	07:49:00	109	205	62	0	154	530
hjf005	2022-06-25	2022-06-25	00:15:00	2022-06-25	08:42:00	165	192	117	33	50	524
hjf005	2022-06-26	2022-06-26	02:39:00	2022-06-26	12:36:00	162	314	120	1	0	596
hjf005	2022-06-27	2022-06-27	00:36:00	2022-06-27	08:24:00	112	254	102	0	120	588
hjf005	2022-06-28	2022-06-28	00:14:00	2022-06-28	07:25:00	171	175	85	0	118	549
hjf005	2022-06-29	2022-06-29	00:23:00	2022-06-29	08:37:00	129	262	100	3	65	556
hjf005	2022-06-29	2022-06-29	00:23:00	2022-06-29	08:37:00	129	262	100	3	65	556
hjf005	2022-06-30	2022-06-30	00:04:00	2022-06-30	07:25:00	133	235	68	5	155	591
hjf005	2022-07-01	2022-06-30	23:52:00	2022-07-01	08:35:00	187	220	109	7	57	573
hjf005	2022-07-02	2022-07-02	00:09:00	2022-07-02	16:11:00	187	305	160	2	40	692
hjf005	2022-07-04	2022-07-04	00:06:00	2022-07-04	07:26:00	119	245	76	0	94	534
hjf005	2022-07-05	2022-07-05	01:30:00	2022-07-05	07:25:00	129	146	80	0	126	481
hjf005	2022-07-07	2022-07-07	03:18:00	2022-07-07	07:27:00	81	116	52	0	66	315
hjf005	2022-07-08	2022-07-08	00:33:00	2022-07-08	08:42:00	140	247	102	0	0	489
hjf005	2022-07-09	2022-07-09	00:37:00	2022-07-09	17:25:00	192	445	115	76	0	752
hjf005	2022-07-10	2022-07-10	01:36:00	2022-07-10	10:35:00	139	279	116	5	128	662
hjf005	2022-07-11	2022-07-11	00:26:00	2022-07-11	07:20:00	126	191	97	0	121	535
hjf005	2022-07-12	2022-07-12	00:19:00	2022-07-12	08:44:00	114	263	95	33	133	605
hjf005	2022-07-14	2022-07-14	00:13:00	2022-07-14	07:23:00	114	228	88	0	176	606
hjf005	2022-07-15	2022-07-15	00:02:00	2022-07-15	07:17:00	159	182	94	0	160	595
hjf005	2022-07-16	2022-07-16	00:23:00	2022-07-16	17:01:00	221	429	129	27	0	779
hjf005	2022-07-17	2022-07-17	01:57:00	2022-07-17	11:52:00	232	216	68	79	160	676
hjf005	2022-07-18	2022-07-18	00:47:00	2022-07-18	08:44:00	145	219	83	30	112	559
hjf005	2022-07-19	2022-07-19	00:45:00	2022-07-19	07:10:00	112	203	70	0	88	473
hjf005	2022-07-20	2022-07-20	00:07:00	2022-07-20	07:26:00	130	262	46	1	40	478
hjf005	2022-07-21	2022-07-21	00:59:00	2022-07-21	07:26:00	117	209	61	0	180	567
hjf005	2022-07-22	2022-07-22	00:17:00	2022-07-22	17:37:00	279	355	139	25	0	773
hjf005	2022-07-23	2022-07-23	00:35:00	2022-07-23	07:33:00	105	221	88	4	0	414
hjf005	2022-07-24	2022-07-24	01:02:00	2022-07-24	12:40:00	282	238	157	21	0	677
hjf005	2022-07-25	2022-07-25	00:53:00	2022-07-25	08:45:00	125	236	90	21	114	565
hjf005	2022-07-27	2022-07-27	00:06:00	2022-07-27	07:25:00	117	252	69	1	81	519
hjf005	2022-07-28	2022-07-28	00:07:00	2022-07-28	07:26:00	121	242	71	5	175	609
hjf005	2022-07-29	2022-07-29	00:45:00	2022-07-29	08:43:00	143	228	107	0	0	478
hjf005	2022-07-30	2022-07-30	00:11:00	2022-07-30	08:44:00	117	323	49	24	157	646
hjf005	2022-07-30	2022-07-30	00:11:00	2022-07-30	08:44:00	117	323	49	24	157	646
hjf005	2022-07-31	2022-07-31	01:28:00	2022-07-31	14:18:00	207	427	113	23	0	747
hjf005	2022-08-01	2022-08-01	00:44:00	2022-08-01	08:06:00	113	231	75	23	0	419
hjf005	2022-08-02	2022-08-02	01:16:00	2022-08-02	07:25:00	116	205	48	0	150	519
hjf005	2022-08-03	2022-08-03	00:24:00	2022-08-03	08:47:00	124	250	103	26	119	596
hjf005	2022-08-04	2022-08-03	23:54:00	2022-08-04	06:02:00	101	222	44	1	170	537
hjf005	2022-08-06	2022-08-06	00:20:00	2022-08-06	07:24:00	107	245	71	1	201	624
hjf005	2022-08-07	2022-08-07	00:24:00	2022-08-07	11:08:00	160	362	119	3	9	650
hjf005	2022-08-08	2022-08-07	23:52:00	2022-08-08	08:27:00	191	187	133	4	130	641
hjf005	2022-08-09	2022-08-09	01:23:00	2022-08-09	08:43:00	124	219	63	34	139	545
hjf005	2022-08-10	2022-08-10	00:05:00	2022-08-10	07:23:00	111	226	100	1	112	549
hjf005	2022-08-11	2022-08-10	23:30:00	2022-08-11	05:32:00	141	146	75	0	137	499
hjf005	2022-08-12	2022-08-11	23:59:00	2022-08-12	08:04:00	134	304	45	2	133	616
hjf005	2022-08-13	2022-08-12	23:46:00	2022-08-13	07:26:00	142	239	79	0	41	501
hjf005	2022-08-14	2022-08-14	01:32:00	2022-08-14	12:20:00	165	378	81	24	0	624
hjf005	2022-08-15	2022-08-15	00:28:00	2022-08-15	08:44:00	123	275	71	27	122	591
hjf005	2022-08-16	2022-08-16	00:29:00	2022-08-16	08:04:00	114	249	91	1	0	454
hjf005	2022-08-17	2022-08-17	00:24:00	2022-08-17	10:44:00	172	299	144	5	92	707
hjf005	2022-08-18	2022-08-18	00:45:00	2022-08-18	07:26:00	129	214	45	13	113	501
hjf005	2022-08-19	2022-08-19	00:41:00	2022-08-19	08:41:00	110	281	63	26	101	555
hjf005	2022-08-20	2022-08-19	23:58:00	2022-08-20	07:24:00	173	167	93	13	30	463
hjf005	2022-08-23	2022-08-23	00:49:00	2022-08-23	07:47:00	122	220	76	0	66	484
hjf005	2022-08-24	2022-08-24	00:21:00	2022-08-24	12:02:00	188	388	124	1	22	722
hjf005	2022-08-26	2022-08-26	00:20:00	2022-08-26	07:24:00	125	229	70	0	201	625
hjf005	2022-08-27	2022-08-26	23:53:00	2022-08-27	07:20:00	126	252	69	0	85	532
hjf005	2022-08-28	2022-08-28	01:06:00	2022-08-28	06:20:00	130	120	64	0	0	314
hjf005	2022-08-29	2022-08-28	23:52:00	2022-08-29	06:25:00	106	198	89	0	54	447
hjf005	2022-08-30	2022-08-30	00:52:00	2022-08-30	10:29:00	155	300	122	0	0	577
hjf005	2022-08-31	2022-08-30	22:24:00	2022-08-31	06:02:00	125	251	82	0	0	458
hjf005	2022-08-31	2022-08-30	22:24:00	2022-08-31	06:02:00	125	251	82	0	0	458
hjf005	2022-09-01	2022-09-01	00:12:00	2022-09-01	08:24:00	125	256	99	12	0	480
hjf005	2022-09-02	2022-09-01	22:57:00	2022-09-02	06:00:00	114	235	74	0	49	472
hjf005	2022-09-03	2022-09-02	23:36:00	2022-09-03	17:43:00	142	265	86	0	0	493
hjf005	2022-09-04	2022-09-04	02:58:00	2022-09-04	10:14:00	116	241	79	0	121	557
hjf005	2022-09-07	2022-09-07	00:36:00	2022-09-07	09:36:00	212	226	101	1	162	701
hjf005	2022-09-08	2022-09-08	00:32:00	2022-09-08	08:44:00	129	240	101	22	124	594
hjf005	2022-09-09	2022-09-09	01:38:00	2022-09-09	12:59:00	188	355	123	15	0	666
hjf005	2022-09-12	2022-09-12	00:34:00	2022-09-12	07:24:00	147	166	91	6	63	467
hjf005	2022-09-13	2022-09-12	23:17:00	2022-09-13	07:26:00	142	274	68	5	134	618
hjf005	2022-09-14	2022-09-14	00:16:00	2022-09-14	12:08:00	193	377	130	12	0	700
hjf005	2022-09-15	2022-09-15	00:47:00	2022-09-15	07:23:00	158	152	85	1	134	529
hjf005	2022-09-16	2022-09-16	00:20:00	2022-09-16	10:53:00	164	346	97	26	0	607
hjf005	2022-09-17	2022-09-17	00:33:00	2022-09-17	07:24:00	150	165	96	0	62	473
hjf006	2022-04-04	2022-04-04	01:24:00	2022-04-04	13:57:00	170	274	103	0	0	547
hjf006	2022-04-05	2022-04-05	00:13:00	2022-04-05	07:21:00	124	235	60	9	129	548
hjf006	2022-04-06	2022-04-06	00:47:00	2022-04-06	07:08:00	129	167	85	0	111	492
hjf006	2022-04-07	2022-04-06	23:02:00	2022-04-07	07:18:00	135	192	115	54	96	538
hjf006	2022-04-08	2022-04-08	00:32:00	2022-04-08	07:23:00	116	209	74	12	123	522
hjf006	2022-04-09	2022-04-09	00:32:00	2022-04-09	07:18:00	105	189	112	0	42	448
hjf006	2022-04-10	2022-04-10	03:20:00	2022-04-10	11:58:00	157	285	73	3	81	596
hjf006	2022-04-11	2022-04-11	01:09:00	2022-04-11	07:20:00	94	198	66	13	63	421
hjf006	2022-04-12	2022-04-12	00:22:00	2022-04-12	07:17:00	96	220	98	1	118	532
hjf006	2022-04-13	2022-04-13	01:11:00	2022-04-13	07:19:00	107	170	67	24	127	471
hjf006	2022-04-14	2022-04-14	00:33:00	2022-04-14	07:06:00	105	178	87	23	54	424
hjf006	2022-04-15	2022-04-15	00:16:00	2022-04-15	07:19:00	135	204	84	0	58	481
hjf006	2022-04-17	2022-04-17	02:15:00	2022-04-17	10:49:00	107	271	135	1	14	527
hjf006	2022-04-18	2022-04-18	01:30:00	2022-04-18	13:41:00	191	321	126	2	0	638
hjf006	2022-04-19	2022-04-19	00:48:00	2022-04-19	06:57:00	101	199	69	0	144	513
hjf006	2022-04-20	2022-04-20	00:53:00	2022-04-20	07:57:00	116	214	66	28	118	514
hjf006	2022-04-21	2022-04-21	00:41:00	2022-04-21	08:14:00	108	228	87	30	48	471
hjf006	2022-04-22	2022-04-21	23:56:00	2022-04-22	10:13:00	144	315	103	55	0	562
hjf006	2022-04-23	2022-04-23	01:12:00	2022-04-23	08:44:00	104	239	78	31	50	471
hjf006	2022-04-25	2022-04-25	01:54:00	2022-04-25	11:53:00	153	325	59	0	0	537
hjf006	2022-04-26	2022-04-26	00:17:00	2022-04-26	07:19:00	156	184	80	2	125	545
hjf006	2022-04-27	2022-04-27	00:14:00	2022-04-27	07:23:00	176	172	79	2	161	588
hjf006	2022-04-28	2022-04-27	23:44:00	2022-04-28	08:39:00	145	306	33	51	73	557
hjf006	2022-04-29	2022-04-28	23:42:00	2022-04-29	07:11:00	132	235	82	0	135	584
hjf006	2022-04-30	2022-04-30	00:26:00	2022-04-30	07:21:00	156	167	90	2	28	441
hjf006	2022-04-30	2022-04-30	00:26:00	2022-04-30	07:21:00	156	167	90	2	28	441
hjf006	2022-05-01	2022-05-01	01:42:00	2022-05-01	11:51:00	207	242	143	17	0	592
hjf006	2022-05-02	2022-05-02	08:25:00	2022-05-02	11:48:00	53	107	41	2	55	256
hjf006	2022-05-03	2022-05-03	00:47:00	2022-05-03	07:05:00	109	199	70	0	74	452
hjf006	2022-05-04	2022-05-04	00:38:00	2022-05-04	07:22:00	91	166	40	107	75	372
hjf006	2022-05-05	2022-05-05	00:28:00	2022-05-05	07:22:00	116	198	72	28	71	457
hjf006	2022-05-06	2022-05-06	00:36:00	2022-05-06	07:22:00	125	180	96	5	166	567
hjf006	2022-05-08	2022-05-08	03:09:00	2022-05-08	12:57:00	159	307	118	4	0	584
hjf006	2022-05-09	2022-05-09	01:22:00	2022-05-09	07:09:00	87	172	88	0	175	522
hjf006	2022-05-10	2022-05-10	00:03:00	2022-05-10	06:42:00	138	182	79	0	141	540
hjf006	2022-05-11	2022-05-10	23:13:00	2022-05-11	07:22:00	148	221	119	1	158	646
hjf006	2022-05-12	2022-05-12	00:15:00	2022-05-12	07:05:00	121	187	96	6	65	469
hjf006	2022-05-13	2022-05-13	00:08:00	2022-05-13	12:24:00	153	402	73	27	0	628
hjf006	2022-05-14	2022-05-14	00:36:00	2022-05-14	07:00:00	104	226	12	42	43	385
hjf006	2022-05-15	2022-05-15	01:57:00	2022-05-15	12:15:00	164	298	111	45	0	573
hjf006	2022-05-16	2022-05-16	10:10:00	2022-05-16	13:39:00	60	84	52	13	0	196
hjf006	2022-05-17	2022-05-17	01:12:00	2022-05-17	07:22:00	139	166	65	0	118	488
hjf006	2022-05-18	2022-05-18	02:26:00	2022-05-18	07:17:00	56	161	74	0	202	493
hjf006	2022-05-19	2022-05-19	02:09:00	2022-05-19	06:59:00	58	153	79	0	68	358
hjf006	2022-05-20	2022-05-20	02:04:00	2022-05-20	07:16:00	115	134	63	0	133	445
hjf006	2022-05-21	2022-05-21	01:24:00	2022-05-21	07:22:00	120	149	84	5	68	421
hjf006	2022-05-22	2022-05-22	02:52:00	2022-05-22	13:11:00	179	295	140	5	0	614
hjf006	2022-05-23	2022-05-23	02:26:00	2022-05-23	13:23:00	237	271	124	25	0	632
hjf006	2022-05-24	2022-05-23	23:49:00	2022-05-24	07:24:00	119	271	65	0	81	536
hjf006	2022-05-25	2022-05-25	01:16:00	2022-05-25	08:03:00	110	225	71	1	96	502
hjf006	2022-05-27	2022-05-27	03:12:00	2022-05-27	12:17:00	211	205	100	29	0	516
hjf006	2022-05-28	2022-05-28	02:10:00	2022-05-28	07:14:00	90	158	56	0	96	400
hjf006	2022-05-29	2022-05-29	04:39:00	2022-05-29	13:57:00	149	258	151	0	0	558
hjf006	2022-05-30	2022-05-30	01:09:00	2022-05-30	09:26:00	170	200	122	5	92	584
hjf006	2022-05-31	2022-05-31	00:29:00	2022-05-31	07:11:00	113	210	79	0	132	534
hjf006	2022-06-01	2022-06-01	01:43:00	2022-06-01	07:01:00	109	138	58	13	109	414
hjf006	2022-06-03	2022-06-03	02:55:00	2022-06-03	12:07:00	149	304	94	5	0	547
hjf006	2022-06-05	2022-06-05	01:51:00	2022-06-05	09:14:00	144	184	103	12	0	431
hjf006	2022-06-06	2022-06-06	00:49:00	2022-06-06	13:38:00	313	267	182	7	0	762
hjf006	2022-06-07	2022-06-07	01:13:00	2022-06-07	07:05:00	133	184	35	0	109	461
hjf006	2022-06-08	2022-06-08	00:38:00	2022-06-08	12:43:00	196	386	123	20	0	705
hjf006	2022-06-09	2022-06-09	01:01:00	2022-06-09	07:05:00	101	200	63	0	67	431
hjf006	2022-06-10	2022-06-10	01:30:00	2022-06-10	08:16:00	154	158	93	1	91	496
hjf006	2022-06-11	2022-06-11	00:14:00	2022-06-11	07:19:00	128	187	108	2	55	478
hjf006	2022-06-13	2022-06-13	00:52:00	2022-06-13	12:34:00	171	428	91	12	0	690
hjf006	2022-06-14	2022-06-14	01:20:00	2022-06-14	07:21:00	99	198	64	0	163	524
hjf006	2022-06-15	2022-06-15	00:12:00	2022-06-15	11:44:00	216	410	64	2	31	721
hjf006	2022-06-17	2022-06-17	00:25:00	2022-06-17	12:24:00	190	337	160	32	86	773
hjf006	2022-06-18	2022-06-18	01:13:00	2022-06-18	08:53:00	124	193	116	27	59	492
hjf006	2022-06-20	2022-06-20	00:37:00	2022-06-20	07:21:00	116	242	41	5	101	500
hjf006	2022-06-21	2022-06-21	00:01:00	2022-06-21	07:21:00	118	190	127	5	61	496
hjf006	2022-06-22	2022-06-21	23:59:00	2022-06-22	07:16:00	120	222	86	9	27	455
hjf006	2022-06-23	2022-06-23	00:55:00	2022-06-23	07:21:00	104	206	70	6	51	431
hjf006	2022-06-24	2022-06-24	01:12:00	2022-06-24	07:48:00	101	214	78	3	169	562
hjf006	2022-06-25	2022-06-25	00:24:00	2022-06-25	07:22:00	105	237	50	26	23	415
hjf006	2022-06-27	2022-06-27	02:14:00	2022-06-27	07:22:00	84	182	0	42	0	266
hjf006	2022-06-29	2022-06-29	01:30:00	2022-06-29	08:40:00	124	188	115	3	81	508
hjf006	2022-06-30	2022-06-30	00:12:00	2022-06-30	07:19:00	90	202	127	8	95	514
hjf006	2022-06-30	2022-06-30	00:12:00	2022-06-30	07:19:00	90	202	127	8	95	514
hjf006	2022-07-02	2022-07-01	23:53:00	2022-07-02	08:39:00	138	260	99	29	107	604
hjf006	2022-07-05	2022-07-05	00:49:00	2022-07-05	07:22:00	136	161	95	1	111	503
hjf006	2022-07-06	2022-07-06	00:27:00	2022-07-06	08:44:00	203	198	95	1	43	539
hjf006	2022-07-07	2022-07-07	00:26:00	2022-07-07	07:22:00	128	170	106	12	134	538
hjf006	2022-07-09	2022-07-08	23:52:00	2022-07-09	08:40:00	174	294	48	12	0	516
hjf006	2022-07-12	2022-07-12	00:51:00	2022-07-12	08:41:00	157	191	81	41	0	429
hjf006	2022-07-14	2022-07-14	00:19:00	2022-07-14	07:20:00	134	187	100	0	79	500
hjf006	2022-07-15	2022-07-15	00:55:00	2022-07-15	06:31:00	95	154	87	0	75	411
hjf006	2022-07-16	2022-07-16	00:40:00	2022-07-16	07:22:00	111	189	94	8	143	537
hjf006	2022-07-18	2022-07-17	23:55:00	2022-07-18	07:06:00	90	234	106	1	138	568
hjf006	2022-07-19	2022-07-18	23:46:00	2022-07-19	07:20:00	98	233	123	0	74	528
hjf006	2022-07-20	2022-07-20	00:38:00	2022-07-20	07:20:00	118	219	65	0	52	454
hjf006	2022-07-21	2022-07-21	01:03:00	2022-07-21	07:19:00	79	190	107	0	65	441
hjf006	2022-07-22	2022-07-21	23:56:00	2022-07-22	07:21:00	115	243	86	1	59	503
hjf006	2022-07-23	2022-07-23	00:17:00	2022-07-23	16:01:00	179	373	131	26	0	683
hjf006	2022-07-25	2022-07-25	01:34:00	2022-07-25	08:46:00	120	253	36	23	114	523
hjf006	2022-07-28	2022-07-28	00:31:00	2022-07-28	07:21:00	96	252	58	4	129	535
hjf006	2022-07-29	2022-07-28	23:24:00	2022-07-29	07:20:00	156	204	104	12	46	510
hjf006	2022-07-29	2022-07-28	23:24:00	2022-07-29	07:20:00	156	204	104	12	46	510
hjf006	2022-08-04	2022-08-04	00:30:00	2022-08-04	06:09:00	77	169	92	1	43	381
hjf006	2022-08-11	2022-08-10	22:16:00	2022-08-11	05:34:00	108	208	122	0	0	438
hjf006	2022-08-15	2022-08-14	23:54:00	2022-08-15	07:09:00	121	227	84	3	91	523
hjf006	2022-08-22	2022-08-22	00:17:00	2022-08-22	08:43:00	127	255	80	44	87	549
hjf006	2022-08-29	2022-08-29	00:17:00	2022-08-29	07:14:00	122	217	78	0	0	417
hjf006	2022-08-31	2022-08-30	21:44:00	2022-08-31	06:03:00	147	233	119	0	0	499
hjf006	2022-09-07	2022-09-07	00:57:00	2022-09-07	08:05:00	121	226	75	6	0	422
hjf006	2022-09-08	2022-09-08	01:34:00	2022-09-08	07:13:00	90	158	81	10	114	443
hjf006	2022-09-10	2022-09-10	00:20:00	2022-09-10	07:16:00	122	215	79	0	76	492
hjf006	2022-09-12	2022-09-11	23:51:00	2022-09-12	07:06:00	126	232	77	0	52	487
hjf007	2022-05-02	2022-05-01	23:30:00	2022-05-02	07:12:00	192	177	93	0	97	559
hjf007	2022-05-03	2022-05-02	23:56:00	2022-05-03	08:42:00	168	202	112	44	96	578
hjf007	2022-05-04	2022-05-03	23:52:00	2022-05-04	07:07:00	153	195	87	0	146	581
hjf007	2022-05-05	2022-05-05	00:06:00	2022-05-05	08:12:00	150	207	95	34	102	554
hjf007	2022-05-06	2022-05-06	00:51:00	2022-05-06	10:53:00	209	224	123	46	0	556
hjf007	2022-05-07	2022-05-07	00:25:00	2022-05-07	08:42:00	156	207	97	37	27	487
hjf007	2022-05-10	2022-05-09	23:49:00	2022-05-10	08:45:00	171	243	82	40	135	631
hjf007	2022-05-11	2022-05-11	00:44:00	2022-05-11	09:52:00	72	275	157	44	82	586
hjf007	2022-05-13	2022-05-13	00:06:00	2022-05-13	07:43:00	122	251	84	0	71	528
hjf007	2022-05-14	2022-05-14	00:09:00	2022-05-14	08:45:00	150	245	74	47	70	539
hjf007	2022-05-15	2022-05-15	05:15:00	2022-05-15	09:30:00	105	115	32	3	0	252
hjf007	2022-05-17	2022-05-16	23:27:00	2022-05-17	08:41:00	165	263	70	56	153	651
hjf007	2022-05-18	2022-05-18	00:49:00	2022-05-18	07:14:00	148	163	73	1	269	653
hjf007	2022-05-19	2022-05-18	23:42:00	2022-05-19	08:12:00	182	194	91	43	133	600
hjf007	2022-05-21	2022-05-21	01:00:00	2022-05-21	08:45:00	88	224	111	42	94	517
hjf007	2022-05-22	2022-05-22	04:26:00	2022-05-22	12:24:00	144	243	88	3	0	475
hjf007	2022-05-23	2022-05-23	00:27:00	2022-05-23	11:04:00	213	268	106	50	94	681
hjf007	2022-05-24	2022-05-23	23:43:00	2022-05-24	08:42:00	137	250	104	48	124	615
hjf007	2022-05-28	2022-05-28	00:03:00	2022-05-28	08:37:00	136	249	68	61	90	543
hjf007	2022-05-31	2022-05-30	23:50:00	2022-05-31	08:44:00	118	363	6	47	109	596
hjf007	2022-05-31	2022-05-30	23:50:00	2022-05-31	08:44:00	118	363	6	47	109	596
hjf007	2022-06-02	2022-06-02	00:07:00	2022-06-02	08:41:00	135	263	80	36	106	584
hjf007	2022-06-03	2022-06-03	01:08:00	2022-06-03	12:30:00	129	457	53	43	0	639
hjf007	2022-06-07	2022-06-06	23:26:00	2022-06-07	07:24:00	176	219	82	1	112	589
hjf007	2022-06-08	2022-06-08	00:45:00	2022-06-08	07:09:00	136	167	80	1	204	587
hjf007	2022-06-09	2022-06-09	00:20:00	2022-06-09	08:41:00	185	187	82	47	99	553
hjf007	2022-06-10	2022-06-10	00:06:00	2022-06-10	09:51:00	203	244	126	12	49	622
hjf007	2022-06-11	2022-06-10	23:50:00	2022-06-11	07:24:00	126	246	81	1	110	563
hjf007	2022-06-15	2022-06-14	23:19:00	2022-06-15	11:08:00	144	451	70	44	0	665
hjf007	2022-06-17	2022-06-16	22:33:00	2022-06-17	10:20:00	129	306	161	111	37	633
hjf007	2022-06-18	2022-06-17	23:52:00	2022-06-18	07:24:00	135	215	102	0	114	566
hjf007	2022-06-21	2022-06-21	00:03:00	2022-06-21	08:54:00	133	294	76	28	263	766
hjf007	2022-06-22	2022-06-22	00:10:00	2022-06-22	06:56:00	49	287	67	3	19	422
hjf007	2022-06-30	2022-06-30	00:51:00	2022-06-30	07:24:00	97	219	77	0	91	484
hjf007	2022-06-30	2022-06-30	00:51:00	2022-06-30	07:24:00	97	219	77	0	91	484
hjf007	2022-07-01	2022-06-30	23:51:00	2022-07-01	08:34:00	139	282	102	0	67	590
hjf007	2022-07-04	2022-07-04	00:02:00	2022-07-04	08:38:00	182	234	72	28	0	488
hjf007	2022-07-07	2022-07-06	23:43:00	2022-07-07	07:26:00	148	256	57	2	148	609
hjf007	2022-07-08	2022-07-07	23:33:00	2022-07-08	08:40:00	143	279	95	30	0	517
hjf007	2022-07-09	2022-07-08	23:53:00	2022-07-09	08:44:00	144	261	84	42	0	489
hjf007	2022-07-11	2022-07-10	23:11:00	2022-07-11	06:07:00	128	178	101	9	0	407
hjf007	2022-07-13	2022-07-13	00:01:00	2022-07-13	08:43:00	145	230	109	38	69	553
hjf007	2022-07-14	2022-07-13	23:52:00	2022-07-14	07:24:00	144	195	113	0	126	578
hjf007	2022-07-18	2022-07-18	00:02:00	2022-07-18	08:43:00	156	218	109	38	0	483
hjf007	2022-07-19	2022-07-18	23:24:00	2022-07-19	08:38:00	143	227	144	40	87	601
hjf007	2022-07-20	2022-07-19	23:33:00	2022-07-20	07:24:00	117	232	120	2	72	541
hjf007	2022-07-22	2022-07-22	00:11:00	2022-07-22	07:10:00	119	180	114	6	99	512
hjf007	2022-07-23	2022-07-22	23:37:00	2022-07-23	07:03:00	172	186	85	3	40	483
hjf007	2022-07-27	2022-07-27	00:08:00	2022-07-27	08:39:00	122	261	92	36	55	530
hjf007	2022-07-27	2022-07-27	00:08:00	2022-07-27	08:39:00	122	261	92	36	55	530
hjf007	2022-08-02	2022-08-01	23:36:00	2022-08-02	08:41:00	132	326	57	30	124	639
hjf007	2022-08-04	2022-08-03	22:15:00	2022-08-04	05:57:00	158	223	78	3	0	459
hjf007	2022-08-06	2022-08-05	23:39:00	2022-08-06	08:36:00	170	205	121	41	86	582
hjf007	2022-08-08	2022-08-08	00:14:00	2022-08-08	08:37:00	185	187	97	34	114	583
hjf007	2022-08-09	2022-08-09	00:15:00	2022-08-09	08:41:00	130	236	112	28	0	478
hjf007	2022-08-10	2022-08-09	23:24:00	2022-08-10	08:42:00	150	266	108	34	82	606
hjf007	2022-08-11	2022-08-10	21:35:00	2022-08-11	05:29:00	166	211	92	5	34	503
hjf007	2022-08-12	2022-08-11	23:13:00	2022-08-12	07:11:00	132	247	99	0	116	594
hjf007	2022-08-15	2022-08-14	23:23:00	2022-08-15	08:37:00	162	268	91	33	129	650
hjf007	2022-08-16	2022-08-15	22:58:00	2022-08-16	07:23:00	146	245	113	1	44	548
hjf007	2022-08-17	2022-08-17	00:50:00	2022-08-17	10:16:00	195	259	110	2	88	652
hjf007	2022-08-19	2022-08-18	23:57:00	2022-08-19	08:41:00	164	252	72	36	114	602
hjf007	2022-08-20	2022-08-19	23:30:00	2022-08-20	08:37:00	159	236	97	55	0	492
hjf007	2022-08-22	2022-08-22	00:18:00	2022-08-22	08:41:00	146	251	82	24	92	571
hjf007	2022-08-23	2022-08-22	22:40:00	2022-08-23	07:20:00	208	195	116	1	58	577
hjf007	2022-08-24	2022-08-24	00:27:00	2022-08-24	08:38:00	182	244	65	0	143	634
hjf007	2022-08-31	2022-08-30	21:30:00	2022-08-31	05:43:00	142	240	111	0	23	516
hjf007	2022-09-02	2022-09-01	23:06:00	2022-09-02	05:49:00	130	250	18	5	0	398
hjf007	2022-09-08	2022-09-08	00:16:00	2022-09-08	08:41:00	131	207	127	40	95	560
hjf007	2022-09-09	2022-09-08	23:52:00	2022-09-09	07:49:00	191	203	83	0	233	710
hjf007	2022-09-12	2022-09-11	23:11:00	2022-09-12	07:24:00	197	215	79	2	86	577
hjf007	2022-09-13	2022-09-12	23:21:00	2022-09-13	08:09:00	227	231	36	34	143	637
hjf008	2022-05-02	2022-05-02	01:42:00	2022-05-02	07:05:00	91	195	29	8	211	526
hjf008	2022-05-03	2022-05-02	23:43:00	2022-05-03	06:59:00	124	227	73	12	93	517
hjf008	2022-05-04	2022-05-04	00:31:00	2022-05-04	07:04:00	104	191	98	0	176	569
hjf008	2022-05-05	2022-05-05	00:41:00	2022-05-05	07:01:00	107	191	80	2	96	474
hjf008	2022-05-06	2022-05-06	00:50:00	2022-05-06	07:10:00	109	142	103	26	120	474
hjf008	2022-05-07	2022-05-07	00:03:00	2022-05-07	06:47:00	124	143	87	50	41	395
hjf008	2022-05-09	2022-05-09	01:14:00	2022-05-09	06:59:00	102	162	78	3	121	463
hjf008	2022-05-11	2022-05-11	00:34:00	2022-05-11	06:54:00	104	189	54	33	190	537
hjf008	2022-05-12	2022-05-12	00:31:00	2022-05-12	06:59:00	118	194	74	2	0	386
hjf008	2022-05-13	2022-05-13	00:05:00	2022-05-13	07:39:00	110	264	43	37	65	482
hjf008	2022-05-14	2022-05-13	23:54:00	2022-05-14	07:02:00	165	160	103	0	88	516
hjf008	2022-05-16	2022-05-16	00:37:00	2022-05-16	06:59:00	115	197	69	1	89	470
hjf008	2022-05-17	2022-05-17	00:06:00	2022-05-17	07:01:00	119	228	66	2	118	531
hjf008	2022-05-18	2022-05-18	00:48:00	2022-05-18	07:06:00	126	209	42	1	170	547
hjf008	2022-05-19	2022-05-19	01:58:00	2022-05-19	06:57:00	89	165	43	2	0	297
hjf008	2022-05-20	2022-05-20	03:40:00	2022-05-20	07:55:00	81	141	32	1	0	254
hjf008	2022-05-21	2022-05-21	00:38:00	2022-05-21	06:52:00	107	200	67	0	109	483
hjf008	2022-05-23	2022-05-23	01:13:00	2022-05-23	06:49:00	109	161	66	0	233	569
hjf008	2022-05-24	2022-05-24	01:14:00	2022-05-24	08:42:00	100	244	47	57	101	492
hjf008	2022-05-28	2022-05-27	23:51:00	2022-05-28	08:39:00	125	285	56	62	0	466
hjf008	2022-05-30	2022-05-30	01:20:00	2022-05-30	07:33:00	127	165	81	0	150	523
hjf008	2022-05-30	2022-05-30	01:20:00	2022-05-30	07:33:00	127	165	81	0	150	523
hjf008	2022-06-01	2022-06-01	00:54:00	2022-06-01	08:16:00	115	258	67	2	108	548
hjf008	2022-06-03	2022-06-03	00:51:00	2022-06-03	08:45:00	123	238	99	14	70	530
hjf008	2022-06-04	2022-06-04	00:39:00	2022-06-04	06:59:00	95	216	67	2	133	511
hjf008	2022-06-07	2022-06-07	00:30:00	2022-06-07	06:59:00	167	204	16	2	119	506
hjf008	2022-06-09	2022-06-09	00:20:00	2022-06-09	06:59:00	128	179	88	4	59	454
hjf008	2022-06-11	2022-06-11	01:02:00	2022-06-11	06:59:00	128	165	63	1	107	463
hjf008	2022-06-14	2022-06-14	01:39:00	2022-06-14	06:59:00	98	152	70	0	123	443
hjf008	2022-06-20	2022-06-19	23:54:00	2022-06-20	07:08:00	125	201	105	3	140	571
hjf008	2022-06-23	2022-06-23	00:12:00	2022-06-23	06:59:00	127	225	55	0	0	407
hjf008	2022-06-24	2022-06-24	00:33:00	2022-06-24	14:08:00	175	345	64	35	0	584
hjf008	2022-07-07	2022-07-07	00:19:00	2022-07-07	07:24:00	150	212	63	0	120	545
hjf008	2022-07-08	2022-07-08	00:12:00	2022-07-08	08:18:00	121	262	90	13	0	473
hjf008	2022-07-09	2022-07-08	23:46:00	2022-07-09	07:05:00	109	272	53	5	0	434
hjf008	2022-07-11	2022-07-11	00:14:00	2022-07-11	08:43:00	122	250	88	49	0	460
hjf008	2022-07-13	2022-07-13	00:07:00	2022-07-13	07:06:00	131	205	83	0	82	501
hjf008	2022-07-15	2022-07-15	00:04:00	2022-07-15	07:04:00	121	236	63	0	73	493
hjf008	2022-07-19	2022-07-19	00:32:00	2022-07-19	08:39:00	111	238	81	57	82	512
hjf008	2022-07-20	2022-07-20	01:09:00	2022-07-20	07:21:00	121	214	37	0	0	372
hjf008	2022-07-21	2022-07-21	00:51:00	2022-07-21	07:19:00	118	201	68	1	102	489
hjf008	2022-07-23	2022-07-23	01:25:00	2022-07-23	07:07:00	95	202	45	0	33	375
hjf008	2022-07-24	2022-07-24	01:24:00	2022-07-24	06:58:00	85	196	51	2	55	387
hjf008	2022-07-26	2022-07-26	00:08:00	2022-07-26	07:19:00	138	234	53	6	0	425
hjf008	2022-08-01	2022-08-01	01:05:00	2022-08-01	07:12:00	142	141	83	1	0	366
hjf008	2022-08-08	2022-08-07	23:45:00	2022-08-08	08:39:00	137	275	71	51	83	566
hjf008	2022-08-11	2022-08-10	23:24:00	2022-08-11	05:30:00	101	206	56	3	0	363
hjf008	2022-08-12	2022-08-12	00:25:00	2022-08-12	07:04:00	105	225	68	1	143	541
hjf008	2022-09-13	2022-09-12	23:33:00	2022-09-13	08:06:00	142	269	97	5	132	640
hjf008	2022-09-14	2022-09-14	02:56:00	2022-09-14	07:25:00	89	133	42	5	112	376
hjf008	2022-09-17	2022-09-16	23:58:00	2022-09-17	07:12:00	120	270	39	5	0	429
hjm001	2022-04-04	2022-04-04	01:23:00	2022-04-04	10:47:00	135	333	93	3	118	679
hjm001	2022-04-05	2022-04-04	23:57:00	2022-04-05	07:12:00	107	239	89	0	186	621
hjm001	2022-04-06	2022-04-06	01:18:00	2022-04-06	10:45:00	200	246	118	3	109	673
hjm001	2022-04-07	2022-04-07	01:11:00	2022-04-07	08:44:00	108	238	79	28	0	425
hjm001	2022-04-08	2022-04-08	03:18:00	2022-04-08	13:27:00	158	277	152	22	64	651
hjm001	2022-04-09	2022-04-09	00:52:00	2022-04-09	08:52:00	128	243	105	4	93	569
hjm001	2022-04-10	2022-04-10	00:59:00	2022-04-10	13:13:00	258	294	151	31	0	703
hjm001	2022-04-11	2022-04-11	01:57:00	2022-04-11	10:54:00	139	293	103	2	103	638
hjm001	2022-04-12	2022-04-12	00:09:00	2022-04-12	07:09:00	112	239	63	6	145	559
hjm001	2022-04-13	2022-04-13	00:20:00	2022-04-13	10:51:00	219	271	141	0	140	771
hjm001	2022-04-14	2022-04-14	01:29:00	2022-04-14	08:13:00	94	222	62	26	101	479
hjm001	2022-04-15	2022-04-14	23:19:00	2022-04-15	08:09:00	181	213	101	35	124	619
hjm001	2022-04-30	2022-04-30	01:06:00	2022-04-30	08:29:00	148	253	7	35	54	462
hjm001	2022-04-30	2022-04-30	01:06:00	2022-04-30	08:29:00	148	253	7	35	54	462
hjm001	2022-05-01	2022-05-01	01:01:00	2022-05-01	14:13:00	232	348	179	33	0	759
hjm001	2022-05-02	2022-05-01	23:56:00	2022-05-02	10:34:00	223	254	156	5	93	726
hjm001	2022-05-03	2022-05-02	23:50:00	2022-05-03	08:15:00	136	284	57	28	56	533
hjm001	2022-05-04	2022-05-04	01:01:00	2022-05-04	10:44:00	116	289	163	15	132	700
hjm001	2022-05-05	2022-05-05	00:46:00	2022-05-05	06:51:00	120	150	94	1	119	483
hjm001	2022-05-06	2022-05-06	01:03:00	2022-05-06	10:49:00	216	242	127	1	43	628
hjm001	2022-05-07	2022-05-07	11:54:00	2022-05-07	17:22:00	84	181	54	9	76	395
hjm001	2022-05-09	2022-05-09	01:37:00	2022-05-09	10:45:00	194	225	129	0	101	649
hjm001	2022-05-11	2022-05-11	01:36:00	2022-05-11	10:57:00	148	330	79	4	149	706
hjm001	2022-05-12	2022-05-12	00:01:00	2022-05-12	08:15:00	116	232	109	37	103	560
hjm001	2022-05-14	2022-05-14	00:48:00	2022-05-14	08:38:00	124	242	82	22	114	562
hjm001	2022-05-16	2022-05-16	01:16:00	2022-05-16	10:48:00	184	240	144	4	46	614
hjm001	2022-05-17	2022-05-17	00:50:00	2022-05-17	08:18:00	110	226	80	32	111	527
hjm001	2022-05-20	2022-05-20	00:31:00	2022-05-20	10:57:00	175	330	121	0	34	660
hjm001	2022-05-21	2022-05-21	00:17:00	2022-05-21	08:36:00	133	252	105	9	131	621
hjm001	2022-05-24	2022-05-23	23:45:00	2022-05-24	08:18:00	143	269	74	27	126	612
hjm001	2022-05-27	2022-05-26	23:46:00	2022-05-27	10:41:00	178	363	110	4	6	657
hjm001	2022-05-28	2022-05-28	00:42:00	2022-05-28	08:44:00	122	241	96	23	97	556
hjm001	2022-05-31	2022-05-31	00:09:00	2022-05-31	07:15:00	112	229	85	0	130	556
hjm001	2022-05-31	2022-05-31	00:09:00	2022-05-31	07:15:00	112	229	85	0	130	556
hjm001	2022-06-01	2022-05-31	21:50:00	2022-06-01	10:53:00	167	482	117	17	135	901
hjm001	2022-06-02	2022-06-02	00:10:00	2022-06-02	08:18:00	118	217	113	40	0	448
hjm001	2022-06-03	2022-06-03	00:56:00	2022-06-03	10:54:00	158	307	133	0	42	640
hjm001	2022-06-04	2022-06-03	23:48:00	2022-06-04	08:44:00	166	222	123	25	75	586
hjm001	2022-06-07	2022-06-06	23:40:00	2022-06-07	07:09:00	170	186	93	0	182	631
hjm001	2022-06-08	2022-06-07	23:55:00	2022-06-08	10:52:00	168	377	109	3	121	775
hjm001	2022-06-09	2022-06-09	00:49:00	2022-06-09	08:12:00	106	205	64	68	119	494
hjm001	2022-06-11	2022-06-11	00:06:00	2022-06-11	08:47:00	109	296	52	64	127	584
hjm001	2022-06-13	2022-06-13	01:28:00	2022-06-13	10:21:00	196	228	109	0	113	646
hjm001	2022-06-14	2022-06-14	00:54:00	2022-06-14	08:09:00	104	200	84	47	168	556
hjm001	2022-06-15	2022-06-15	00:54:00	2022-06-15	09:18:00	144	271	74	15	0	489
hjm001	2022-06-16	2022-06-16	00:34:00	2022-06-16	06:59:00	99	209	77	0	44	429
hjm001	2022-06-20	2022-06-20	01:40:00	2022-06-20	08:39:00	93	208	44	74	0	345
hjm001	2022-06-21	2022-06-21	00:05:00	2022-06-21	08:45:00	132	289	72	27	0	493
hjm001	2022-06-22	2022-06-21	23:43:00	2022-06-22	08:44:00	141	290	102	8	69	602
hjm001	2022-06-23	2022-06-22	21:49:00	2022-06-23	08:16:00	140	298	125	64	96	659
hjm001	2022-06-24	2022-06-24	00:16:00	2022-06-24	07:45:00	114	247	87	1	0	448
hjm001	2022-06-25	2022-06-24	22:22:00	2022-06-25	17:35:00	262	538	158	22	50	1008
hjm001	2022-06-27	2022-06-26	23:28:00	2022-06-27	08:47:00	127	291	94	47	126	638
hjm001	2022-06-28	2022-06-27	23:45:00	2022-06-28	08:44:00	141	272	96	30	123	632
hjm001	2022-06-29	2022-06-28	23:46:00	2022-06-29	08:41:00	140	241	125	29	89	595
hjm001	2022-06-30	2022-06-29	23:20:00	2022-06-30	08:48:00	132	266	136	34	122	656
hjm001	2022-06-30	2022-06-29	23:20:00	2022-06-30	08:48:00	132	266	136	34	122	656
hjm001	2022-07-01	2022-06-30	23:25:00	2022-07-01	08:45:00	158	329	51	22	66	604
hjm001	2022-07-02	2022-07-01	23:45:00	2022-07-02	08:46:00	86	335	80	40	0	501
hjm001	2022-07-04	2022-07-04	00:12:00	2022-07-04	08:46:00	127	273	85	29	123	608
hjm001	2022-07-05	2022-07-04	23:20:00	2022-07-05	08:47:00	133	308	94	32	139	674
hjm001	2022-07-06	2022-07-05	23:28:00	2022-07-06	08:41:00	127	286	83	57	94	590
hjm001	2022-07-07	2022-07-06	23:34:00	2022-07-07	08:44:00	194	202	112	42	137	645
hjm001	2022-07-08	2022-07-07	23:40:00	2022-07-08	08:41:00	159	212	98	72	24	493
hjm001	2022-07-09	2022-07-08	23:58:00	2022-07-09	08:24:00	123	258	98	27	0	479
hjm001	2022-07-11	2022-07-10	23:26:00	2022-07-11	08:45:00	134	326	74	25	90	624
hjm001	2022-07-12	2022-07-11	22:34:00	2022-07-12	08:44:00	161	302	89	58	119	671
hjm001	2022-07-13	2022-07-12	23:28:00	2022-07-13	08:44:00	141	246	136	33	68	591
hjm001	2022-07-14	2022-07-13	23:35:00	2022-07-14	06:33:00	118	216	83	1	223	640
hjm001	2022-07-15	2022-07-14	23:16:00	2022-07-15	08:45:00	142	285	107	35	0	534
hjm001	2022-07-18	2022-07-17	23:34:00	2022-07-18	08:42:00	196	236	96	20	134	662
hjm001	2022-07-19	2022-07-19	00:21:00	2022-07-19	08:39:00	120	273	61	44	0	454
hjm001	2022-07-20	2022-07-19	23:42:00	2022-07-20	07:16:00	121	248	84	1	89	542
hjm001	2022-07-22	2022-07-22	00:09:00	2022-07-22	10:42:00	180	327	117	9	49	673
hjm001	2022-07-23	2022-07-22	23:55:00	2022-07-23	17:41:00	211	471	105	67	0	787
hjm001	2022-07-25	2022-07-24	23:17:00	2022-07-25	08:45:00	143	304	99	22	131	677
hjm001	2022-07-26	2022-07-25	23:52:00	2022-07-26	06:40:00	138	186	83	1	152	559
hjm001	2022-07-27	2022-07-26	23:45:00	2022-07-27	08:38:00	144	267	86	36	49	546
hjm001	2022-07-28	2022-07-27	23:54:00	2022-07-28	08:41:00	110	262	81	74	77	530
hjm001	2022-07-29	2022-07-28	23:45:00	2022-07-29	09:42:00	146	335	102	14	28	611
hjm001	2022-07-30	2022-07-29	23:49:00	2022-07-30	08:40:00	129	298	61	43	0	488
hjm001	2022-07-30	2022-07-29	23:49:00	2022-07-30	08:40:00	129	298	61	43	0	488
hjm001	2022-08-01	2022-08-01	00:27:00	2022-08-01	07:03:00	96	219	59	22	112	486
hjm001	2022-08-02	2022-08-01	23:40:00	2022-08-02	08:46:00	131	284	85	46	110	610
hjm001	2022-08-03	2022-08-02	23:36:00	2022-08-03	10:40:00	205	288	146	25	140	779
hjm001	2022-08-04	2022-08-03	23:52:00	2022-08-04	08:45:00	184	204	96	49	34	518
hjm001	2022-08-05	2022-08-04	23:36:00	2022-08-05	06:43:00	134	195	97	1	0	426
hjm001	2022-08-06	2022-08-05	22:58:00	2022-08-06	05:43:00	113	174	106	12	45	438
hjm001	2022-08-08	2022-08-07	23:16:00	2022-08-08	08:43:00	151	276	89	51	0	516
hjm001	2022-08-09	2022-08-08	22:12:00	2022-08-09	08:43:00	125	316	82	108	121	644
hjm001	2022-08-10	2022-08-09	23:45:00	2022-08-10	10:43:00	161	361	111	25	29	662
hjm001	2022-08-12	2022-08-11	23:24:00	2022-08-12	08:44:00	149	287	88	36	104	628
hjm001	2022-08-13	2022-08-12	23:05:00	2022-08-13	05:23:00	118	209	51	0	0	378
hjm002	2022-04-04	2022-04-04	00:44:00	2022-04-04	12:29:00	161	327	122	37	0	610
hjm002	2022-04-05	2022-04-05	00:36:00	2022-04-05	08:10:00	116	248	81	9	51	496
hjm002	2022-04-06	2022-04-06	01:29:00	2022-04-06	07:53:00	145	143	81	15	131	500
hjm002	2022-04-07	2022-04-07	01:11:00	2022-04-07	08:41:00	159	191	93	7	0	443
hjm002	2022-04-08	2022-04-08	00:50:00	2022-04-08	09:19:00	126	250	98	35	76	550
hjm002	2022-04-09	2022-04-09	01:30:00	2022-04-09	08:41:00	86	201	130	14	61	478
hjm002	2022-04-10	2022-04-10	03:30:00	2022-04-10	12:00:00	99	249	145	17	0	493
hjm002	2022-04-11	2022-04-10	23:59:00	2022-04-11	08:35:00	103	251	136	26	128	618
hjm002	2022-04-12	2022-04-12	01:37:00	2022-04-12	08:13:00	124	171	84	17	53	432
hjm002	2022-04-13	2022-04-13	00:54:00	2022-04-13	08:10:00	113	213	99	11	68	493
hjm002	2022-04-14	2022-04-14	00:48:00	2022-04-14	08:12:00	160	180	95	9	34	469
hjm002	2022-04-15	2022-04-14	22:30:00	2022-04-15	08:15:00	141	193	127	124	53	514
hjm002	2022-04-16	2022-04-16	01:06:00	2022-04-16	07:14:00	146	144	78	0	52	420
hjm002	2022-04-17	2022-04-17	02:53:00	2022-04-17	13:34:00	178	281	147	35	71	677
hjm002	2022-04-18	2022-04-18	00:49:00	2022-04-18	07:18:00	143	162	84	0	87	476
hjm002	2022-04-20	2022-04-20	00:22:00	2022-04-20	07:49:00	133	215	99	0	159	606
hjm002	2022-04-21	2022-04-21	00:34:00	2022-04-21	08:09:00	114	252	71	18	50	487
hjm002	2022-04-22	2022-04-22	00:37:00	2022-04-22	11:00:00	187	270	165	1	42	664
hjm002	2022-04-23	2022-04-23	01:37:00	2022-04-23	08:38:00	136	166	86	33	86	474
hjm002	2022-04-24	2022-04-24	02:40:00	2022-04-24	11:39:00	151	249	120	19	28	548
hjm002	2022-04-25	2022-04-25	00:18:00	2022-04-25	07:54:00	133	232	91	0	213	669
hjm002	2022-04-26	2022-04-26	01:27:00	2022-04-26	08:08:00	91	177	89	44	74	431
hjm002	2022-04-27	2022-04-27	01:05:00	2022-04-27	10:48:00	211	239	119	14	59	628
hjm002	2022-04-28	2022-04-28	01:48:00	2022-04-28	08:10:00	113	190	69	10	104	476
hjm002	2022-04-29	2022-04-29	01:11:00	2022-04-29	11:12:00	166	265	170	0	22	623
hjm002	2022-04-30	2022-04-30	00:58:00	2022-04-30	08:42:00	112	251	82	19	23	468
hjm002	2022-04-30	2022-04-30	00:58:00	2022-04-30	08:42:00	112	251	82	19	23	468
hjm002	2022-05-01	2022-05-01	02:48:00	2022-05-01	10:21:00	161	184	108	0	78	531
hjm002	2022-05-02	2022-05-02	01:59:00	2022-05-02	10:57:00	172	230	125	11	43	570
hjm002	2022-05-03	2022-05-03	01:25:00	2022-05-03	08:15:00	117	177	108	8	69	471
hjm002	2022-05-04	2022-05-04	01:12:00	2022-05-04	07:55:00	104	213	78	8	212	607
hjm002	2022-05-05	2022-05-05	01:49:00	2022-05-05	08:13:00	114	211	49	10	142	516
hjm002	2022-05-06	2022-05-06	01:26:00	2022-05-06	10:52:00	161	281	120	4	16	578
hjm002	2022-05-07	2022-05-07	01:26:00	2022-05-07	08:41:00	124	190	107	14	113	534
hjm002	2022-05-08	2022-05-08	00:30:00	2022-05-08	12:15:00	140	300	85	180	0	525
hjm002	2022-05-09	2022-05-09	01:19:00	2022-05-09	10:51:00	141	244	145	42	80	610
hjm002	2022-05-10	2022-05-10	01:32:00	2022-05-10	08:19:00	103	181	107	16	0	391
hjm002	2022-05-11	2022-05-11	01:15:00	2022-05-11	07:54:00	118	186	93	2	184	581
hjm002	2022-05-12	2022-05-12	00:50:00	2022-05-12	08:11:00	100	173	127	41	99	499
hjm002	2022-05-13	2022-05-13	00:40:00	2022-05-13	07:50:00	112	266	52	0	78	508
hjm002	2022-05-14	2022-05-14	01:08:00	2022-05-14	05:52:00	83	145	56	0	85	369
hjm002	2022-05-15	2022-05-15	01:57:00	2022-05-15	13:31:00	250	260	128	9	56	694
hjm002	2022-05-16	2022-05-16	01:44:00	2022-05-16	07:41:00	106	181	68	2	195	550
hjm002	2022-05-17	2022-05-16	23:46:00	2022-05-17	08:14:00	153	198	93	64	51	495
hjm002	2022-05-18	2022-05-18	01:22:00	2022-05-18	07:57:00	106	187	92	10	211	596
hjm002	2022-05-19	2022-05-19	00:41:00	2022-05-19	07:57:00	123	251	37	25	139	550
hjm002	2022-05-20	2022-05-20	01:00:00	2022-05-20	07:14:00	104	189	81	0	183	557
hjm002	2022-05-21	2022-05-21	01:19:00	2022-05-21	08:32:00	106	187	127	13	87	507
hjm002	2022-05-22	2022-05-22	03:23:00	2022-05-22	12:15:00	121	278	100	33	62	561
hjm002	2022-05-23	2022-05-23	00:53:00	2022-05-23	07:10:00	98	176	103	0	246	623
hjm002	2022-05-24	2022-05-24	00:53:00	2022-05-24	08:14:00	120	222	88	11	112	542
hjm002	2022-05-26	2022-05-26	01:33:00	2022-05-26	10:00:00	139	262	95	11	36	532
hjm002	2022-05-27	2022-05-27	01:15:00	2022-05-27	10:51:00	143	268	154	11	20	585
hjm002	2022-05-28	2022-05-28	02:00:00	2022-05-28	08:44:00	94	195	91	24	70	450
hjm002	2022-05-29	2022-05-29	01:49:00	2022-05-29	10:27:00	188	221	109	0	92	610
hjm002	2022-05-30	2022-05-30	01:32:00	2022-05-30	07:14:00	128	139	75	0	242	584
hjm002	2022-05-31	2022-05-31	00:23:00	2022-05-31	08:18:00	123	245	93	14	58	519
hjm002	2022-05-31	2022-05-31	00:23:00	2022-05-31	08:18:00	123	245	93	14	58	519
hjm002	2022-06-01	2022-06-01	01:29:00	2022-06-01	09:19:00	101	218	143	8	98	560
hjm002	2022-06-02	2022-06-02	00:34:00	2022-06-02	08:12:00	89	224	137	8	114	564
hjm002	2022-06-03	2022-06-03	00:41:00	2022-06-03	06:06:00	100	180	45	0	154	479
hjm002	2022-06-04	2022-06-04	00:29:00	2022-06-04	08:39:00	136	291	23	40	52	502
hjm002	2022-06-05	2022-06-05	01:35:00	2022-06-05	07:30:00	132	134	84	5	78	428
hjm002	2022-06-07	2022-06-07	00:27:00	2022-06-07	08:16:00	110	262	86	11	78	536
hjm002	2022-06-08	2022-06-08	00:25:00	2022-06-08	10:57:00	225	241	146	20	98	710
hjm002	2022-06-09	2022-06-09	01:06:00	2022-06-09	08:16:00	141	171	96	22	129	537
hjm002	2022-06-10	2022-06-10	00:59:00	2022-06-10	10:50:00	149	318	121	3	40	628
hjm002	2022-06-11	2022-06-11	01:18:00	2022-06-11	08:38:00	91	248	74	27	112	525
hjm002	2022-06-14	2022-06-14	02:15:00	2022-06-14	08:16:00	106	186	59	10	0	351
hjm002	2022-06-15	2022-06-15	00:31:00	2022-06-15	10:58:00	237	245	132	13	86	700
hjm002	2022-06-16	2022-06-16	02:21:00	2022-06-16	16:25:00	154	317	67	14	0	538
hjm002	2022-06-18	2022-06-18	01:49:00	2022-06-18	08:43:00	115	216	68	15	104	503
hjm002	2022-06-21	2022-06-21	01:02:00	2022-06-21	08:49:00	93	225	144	5	92	554
hjm002	2022-06-22	2022-06-22	00:40:00	2022-06-22	07:13:00	109	203	81	0	40	433
hjm002	2022-06-23	2022-06-22	23:15:00	2022-06-23	07:54:00	135	242	132	10	109	618
hjm002	2022-06-24	2022-06-24	00:50:00	2022-06-24	07:47:00	115	213	89	0	153	570
hjm002	2022-06-25	2022-06-25	00:47:00	2022-06-25	08:30:00	160	200	91	12	44	495
hjm002	2022-06-27	2022-06-26	22:56:00	2022-06-27	08:30:00	139	338	85	12	126	688
hjm002	2022-06-30	2022-06-30	00:03:00	2022-06-30	08:42:00	118	287	103	11	109	617
hjm002	2022-06-30	2022-06-30	00:03:00	2022-06-30	08:42:00	118	287	103	11	109	617
hjm002	2022-07-01	2022-07-01	00:24:00	2022-07-01	08:32:00	125	249	103	11	65	542
hjm002	2022-07-02	2022-07-02	00:41:00	2022-07-02	16:23:00	163	351	144	11	10	668
hjm002	2022-07-03	2022-07-03	01:42:00	2022-07-03	09:18:00	124	216	116	0	66	522
hjm002	2022-07-04	2022-07-04	01:00:00	2022-07-04	08:40:00	132	199	105	24	108	544
hjm002	2022-07-05	2022-07-05	00:46:00	2022-07-05	08:33:00	113	272	70	12	0	455
hjm002	2022-07-06	2022-07-06	01:15:00	2022-07-06	08:44:00	149	178	110	12	27	464
hjm002	2022-07-07	2022-07-07	00:27:00	2022-07-07	08:41:00	131	272	79	12	115	597
hjm002	2022-07-08	2022-07-08	00:36:00	2022-07-08	08:26:00	118	245	88	19	0	451
hjm002	2022-07-09	2022-07-09	00:38:00	2022-07-09	08:43:00	141	261	74	9	0	476
hjm002	2022-07-10	2022-07-10	01:23:00	2022-07-10	08:05:00	78	207	117	0	187	589
hjm002	2022-07-11	2022-07-11	00:57:00	2022-07-11	08:41:00	130	248	74	12	103	555
hjm002	2022-07-12	2022-07-12	00:49:00	2022-07-12	08:44:00	176	184	105	10	108	573
hjm002	2022-07-14	2022-07-14	00:28:00	2022-07-14	07:52:00	111	249	70	14	138	568
hjm002	2022-07-16	2022-07-16	01:00:00	2022-07-16	09:52:00	132	299	90	11	21	542
hjm002	2022-07-18	2022-07-18	00:15:00	2022-07-18	08:39:00	106	249	135	14	97	587
hjm002	2022-07-19	2022-07-19	01:18:00	2022-07-19	08:30:00	153	160	112	7	0	425
hjm002	2022-07-20	2022-07-20	00:08:00	2022-07-20	08:07:00	171	192	108	8	0	471
hjm002	2022-07-21	2022-07-21	01:22:00	2022-07-21	09:06:00	142	241	81	0	78	542
hjm002	2022-07-22	2022-07-22	01:13:00	2022-07-22	10:46:00	143	313	110	7	18	584
hjm002	2022-07-24	2022-07-24	02:36:00	2022-07-24	08:24:00	97	163	88	0	236	584
hjm002	2022-07-25	2022-07-25	00:38:00	2022-07-25	08:41:00	167	194	121	1	151	633
hjm002	2022-07-26	2022-07-26	01:26:00	2022-07-26	07:49:00	108	184	69	22	118	479
hjm002	2022-07-27	2022-07-27	00:33:00	2022-07-27	08:41:00	142	243	88	15	57	530
hjm002	2022-07-29	2022-07-29	00:49:00	2022-07-29	09:40:00	128	269	119	15	45	561
hjm002	2022-07-29	2022-07-29	00:49:00	2022-07-29	09:40:00	128	269	119	15	45	561
hjm002	2022-07-30	2022-07-30	01:21:00	2022-07-30	08:44:00	151	196	77	19	58	482
hjm002	2022-07-31	2022-07-31	01:33:00	2022-07-31	09:06:00	167	192	90	4	0	449
hjm002	2022-08-01	2022-08-01	00:47:00	2022-08-01	08:40:00	139	189	118	27	104	550
hjm002	2022-08-02	2022-08-01	23:52:00	2022-08-02	08:43:00	164	252	108	7	122	646
hjm002	2022-08-03	2022-08-03	01:36:00	2022-08-03	07:08:00	97	169	66	0	272	604
hjm002	2022-08-05	2022-08-05	00:25:00	2022-08-05	08:32:00	176	192	112	7	80	560
hjm002	2022-08-06	2022-08-06	00:16:00	2022-08-06	05:39:00	93	170	60	0	100	423
hjm002	2022-08-08	2022-08-08	00:16:00	2022-08-08	08:38:00	145	248	92	17	0	485
hjm002	2022-08-09	2022-08-09	00:19:00	2022-08-09	08:42:00	115	323	59	6	107	604
hjm002	2022-08-10	2022-08-10	01:06:00	2022-08-10	09:39:00	175	206	112	20	97	590
hjm002	2022-08-12	2022-08-12	00:39:00	2022-08-12	08:41:00	113	220	142	7	77	552
hjm002	2022-08-13	2022-08-12	23:29:00	2022-08-13	05:40:00	131	156	84	0	169	540
hjm002	2022-08-15	2022-08-14	21:55:00	2022-08-15	08:36:00	142	293	185	21	0	620
hjm002	2022-08-16	2022-08-16	00:58:00	2022-08-16	08:35:00	130	251	68	8	115	564
hjm002	2022-08-17	2022-08-17	00:35:00	2022-08-17	07:17:00	110	215	77	0	200	602
hjm002	2022-08-18	2022-08-17	22:56:00	2022-08-18	08:41:00	170	251	96	68	100	617
hjm002	2022-08-19	2022-08-19	00:46:00	2022-08-19	08:41:00	118	261	90	6	93	562
hjm002	2022-08-20	2022-08-20	01:07:00	2022-08-20	08:40:00	150	176	82	45	93	501
hjm002	2022-08-22	2022-08-22	00:35:00	2022-08-22	08:27:00	125	286	56	5	97	564
hjm002	2022-08-23	2022-08-23	00:48:00	2022-08-23	08:35:00	153	201	102	11	137	593
hjm002	2022-08-25	2022-08-25	01:01:00	2022-08-25	08:34:00	119	226	102	6	72	519
hjm002	2022-08-27	2022-08-27	00:16:00	2022-08-27	10:41:00	227	251	147	0	0	625
hjm002	2022-09-09	2022-09-09	01:17:00	2022-09-09	07:14:00	120	155	81	1	232	588
hjm003	2022-04-05	2022-04-04	23:59:00	2022-04-05	07:05:00	113	200	102	11	0	415
hjm003	2022-04-06	2022-04-06	00:23:00	2022-04-06	08:41:00	230	194	54	20	83	561
hjm003	2022-04-09	2022-04-09	00:03:00	2022-04-09	06:48:00	114	191	89	11	0	394
hjm003	2022-04-11	2022-04-11	00:38:00	2022-04-11	07:33:00	114	192	96	13	79	481
hjm003	2022-04-12	2022-04-12	00:36:00	2022-04-12	07:10:00	153	154	87	0	84	478
hjm003	2022-04-15	2022-04-14	23:55:00	2022-04-15	07:14:00	170	187	82	0	0	439
hjm003	2022-04-30	2022-04-29	23:11:00	2022-04-30	07:00:00	169	188	112	0	0	469
hjm003	2022-04-30	2022-04-29	23:11:00	2022-04-30	07:00:00	169	188	112	0	0	469
hjm003	2022-05-01	2022-05-01	00:13:00	2022-05-01	09:47:00	163	267	144	0	0	574
hjm003	2022-05-03	2022-05-02	23:40:00	2022-05-03	07:02:00	131	224	87	0	59	501
hjm003	2022-05-05	2022-05-04	23:53:00	2022-05-05	07:00:00	154	164	109	0	0	427
hjm003	2022-05-06	2022-05-06	00:14:00	2022-05-06	07:10:00	98	226	92	0	17	433
hjm003	2022-05-09	2022-05-09	00:23:00	2022-05-09	07:05:00	125	195	82	0	54	456
hjm003	2022-05-11	2022-05-11	00:58:00	2022-05-11	07:07:00	94	203	72	0	52	421
hjm003	2022-05-12	2022-05-12	01:02:00	2022-05-12	07:10:00	93	200	75	0	0	368
hjm003	2022-05-13	2022-05-13	01:05:00	2022-05-13	07:10:00	103	182	80	0	40	405
hjm003	2022-05-14	2022-05-14	01:03:00	2022-05-14	07:00:00	116	181	60	0	91	448
hjm003	2022-05-16	2022-05-16	00:31:00	2022-05-16	07:03:00	148	158	85	1	0	391
hjm003	2022-05-17	2022-05-17	01:00:00	2022-05-17	07:03:00	115	174	74	0	0	363
hjm003	2022-05-18	2022-05-18	00:56:00	2022-05-18	07:04:00	117	167	83	1	143	510
hjm003	2022-05-19	2022-05-19	00:33:00	2022-05-19	07:11:00	152	161	85	0	0	398
hjm003	2022-05-20	2022-05-20	01:18:00	2022-05-20	07:14:00	100	203	53	0	28	384
hjm003	2022-05-21	2022-05-21	00:31:00	2022-05-21	07:00:00	107	211	71	0	27	416
hjm003	2022-05-23	2022-05-23	00:56:00	2022-05-23	07:06:00	110	173	86	1	55	424
hjm003	2022-05-27	2022-05-27	01:23:00	2022-05-27	07:14:00	101	183	67	0	166	517
hjm003	2022-05-31	2022-05-31	03:30:00	2022-05-31	07:14:00	81	97	46	0	0	224
hjm003	2022-05-31	2022-05-31	03:30:00	2022-05-31	07:14:00	81	97	46	0	0	224
hjm003	2022-06-01	2022-06-01	01:07:00	2022-06-01	07:10:00	102	177	84	0	157	520
hjm003	2022-06-07	2022-06-06	23:33:00	2022-06-07	07:12:00	126	257	76	0	0	459
hjm003	2022-06-08	2022-06-08	00:29:00	2022-06-08	10:46:00	161	342	52	62	0	555
hjm003	2022-06-09	2022-06-09	01:23:00	2022-06-09	06:43:00	102	199	18	1	0	319
hjm003	2022-06-10	2022-06-10	00:13:00	2022-06-10	07:09:00	104	248	64	0	34	450
hjm003	2022-06-11	2022-06-11	00:48:00	2022-06-11	07:00:00	102	204	66	0	0	372
hjm003	2022-06-12	2022-06-12	01:44:00	2022-06-12	09:02:00	146	193	99	0	0	438
hjm003	2022-06-13	2022-06-12	23:38:00	2022-06-13	07:04:00	162	174	106	4	76	518
hjm003	2022-06-14	2022-06-14	00:38:00	2022-06-14	07:09:00	119	190	81	1	0	390
hjm003	2022-06-15	2022-06-15	00:13:00	2022-06-15	07:10:00	124	240	49	4	0	413
hjm003	2022-06-17	2022-06-17	00:22:00	2022-06-17	07:00:00	122	217	59	0	43	441
hjm003	2022-06-18	2022-06-18	00:10:00	2022-06-18	07:00:00	124	246	40	0	0	410
hjm003	2022-06-19	2022-06-19	01:05:00	2022-06-19	08:37:00	124	236	92	0	0	452
hjm003	2022-06-24	2022-06-24	01:09:00	2022-06-24	07:16:00	106	217	44	0	0	367
hjm003	2022-06-25	2022-06-25	00:39:00	2022-06-25	08:44:00	123	253	55	54	0	431
hjm003	2022-06-26	2022-06-26	02:07:00	2022-06-26	08:21:00	115	200	59	0	0	374
hjm003	2022-06-29	2022-06-29	00:21:00	2022-06-29	07:10:00	101	193	113	2	0	407
hjm003	2022-06-30	2022-06-30	00:51:00	2022-06-30	08:31:00	116	248	70	26	0	434
hjm003	2022-07-01	2022-07-01	01:12:00	2022-07-01	08:49:00	126	244	62	25	0	432
hjm003	2022-07-02	2022-07-01	23:31:00	2022-07-02	07:14:00	141	277	45	0	40	503
hjm003	2022-07-03	2022-07-03	02:17:00	2022-07-03	10:02:00	117	248	99	1	0	464
hjm003	2022-07-04	2022-07-04	00:24:00	2022-07-04	08:34:00	134	255	63	38	0	452
hjm003	2022-07-09	2022-07-09	00:38:00	2022-07-09	07:10:00	109	207	76	0	0	392
hjm003	2022-07-10	2022-07-10	00:43:00	2022-07-10	09:58:00	159	304	92	0	0	555
hjm003	2022-07-11	2022-07-11	01:33:00	2022-07-11	08:05:00	106	205	57	24	0	368
hjm003	2022-07-12	2022-07-12	00:14:00	2022-07-12	07:00:00	120	229	57	0	0	406
hjm003	2022-07-13	2022-07-13	00:46:00	2022-07-13	07:12:00	104	238	42	2	0	384
hjm003	2022-07-14	2022-07-14	00:55:00	2022-07-14	07:14:00	108	196	75	0	0	379
hjm003	2022-07-15	2022-07-15	00:52:00	2022-07-15	07:09:00	116	229	30	2	55	430
hjm003	2022-07-16	2022-07-16	01:40:00	2022-07-16	09:12:00	111	245	69	27	0	425
hjm003	2022-07-23	2022-07-23	00:23:00	2022-07-23	07:16:00	128	203	82	0	0	413
hjm003	2022-07-25	2022-07-25	01:48:00	2022-07-25	07:11:00	90	179	54	0	0	323
hjm003	2022-07-26	2022-07-26	00:18:00	2022-07-26	07:11:00	114	186	110	3	0	410
hjm003	2022-07-27	2022-07-27	00:44:00	2022-07-27	07:16:00	139	163	89	1	0	391
hjm004	2022-04-04	2022-04-04	01:19:00	2022-04-04	07:41:00	78	227	61	16	256	622
hjm004	2022-04-05	2022-04-05	00:12:00	2022-04-05	08:09:00	121	257	79	20	115	572
hjm004	2022-04-06	2022-04-06	01:16:00	2022-04-06	09:14:00	110	281	74	13	109	574
hjm004	2022-04-07	2022-04-07	00:28:00	2022-04-07	08:42:00	124	250	98	22	95	567
hjm004	2022-04-08	2022-04-08	00:28:00	2022-04-08	11:19:00	161	358	116	16	0	635
hjm004	2022-04-09	2022-04-09	00:08:00	2022-04-09	08:42:00	137	275	83	19	68	563
hjm004	2022-04-10	2022-04-10	02:24:00	2022-04-10	12:32:00	219	234	131	24	0	584
hjm004	2022-04-11	2022-04-11	00:45:00	2022-04-11	09:17:00	120	273	100	19	169	662
hjm004	2022-04-12	2022-04-12	00:33:00	2022-04-12	08:12:00	96	260	81	22	129	566
hjm004	2022-04-13	2022-04-13	00:48:00	2022-04-13	11:17:00	142	347	113	27	65	667
hjm004	2022-04-14	2022-04-14	00:43:00	2022-04-14	08:12:00	109	233	87	20	71	500
hjm004	2022-04-15	2022-04-15	00:04:00	2022-04-15	08:12:00	92	339	39	18	0	470
hjm004	2022-04-16	2022-04-16	00:04:00	2022-04-16	08:12:00	95	284	51	58	66	496
hjm004	2022-04-17	2022-04-17	01:56:00	2022-04-17	14:58:00	183	332	180	0	0	695
hjm004	2022-04-18	2022-04-18	01:01:00	2022-04-18	10:49:00	120	357	93	18	62	632
hjm004	2022-04-19	2022-04-19	00:21:00	2022-04-19	08:12:00	120	255	70	26	148	593
hjm004	2022-04-20	2022-04-20	00:25:00	2022-04-20	12:59:00	168	394	168	24	0	730
hjm004	2022-04-21	2022-04-21	00:28:00	2022-04-21	08:10:00	109	246	79	28	112	546
hjm004	2022-04-22	2022-04-22	02:17:00	2022-04-22	10:24:00	95	273	98	21	67	533
hjm004	2022-04-23	2022-04-23	00:24:00	2022-04-23	08:42:00	133	263	72	30	111	579
hjm004	2022-04-25	2022-04-25	01:38:00	2022-04-25	11:07:00	114	300	86	0	26	526
hjm004	2022-04-26	2022-04-26	00:45:00	2022-04-26	08:07:00	111	279	36	16	98	524
hjm004	2022-04-27	2022-04-27	00:53:00	2022-04-27	12:59:00	201	375	130	20	0	706
hjm004	2022-04-28	2022-04-28	00:27:00	2022-04-28	08:12:00	117	283	42	23	87	529
hjm004	2022-04-29	2022-04-29	00:47:00	2022-04-29	11:19:00	138	354	119	21	0	611
hjm004	2022-04-29	2022-04-29	00:47:00	2022-04-29	11:19:00	138	354	119	21	0	611
hjm004	2022-04-30	2022-04-30	01:30:00	2022-04-30	07:14:00	84	183	64	13	48	379
hjm004	2022-05-01	2022-05-01	01:41:00	2022-05-01	13:03:00	176	371	125	10	0	672
hjm004	2022-05-02	2022-05-02	01:20:00	2022-05-02	12:49:00	144	399	124	22	0	667
hjm004	2022-05-03	2022-05-03	01:18:00	2022-05-03	08:12:00	97	246	48	23	76	467
hjm004	2022-05-04	2022-05-04	01:39:00	2022-05-04	12:52:00	161	316	146	0	0	623
hjm004	2022-05-05	2022-05-05	00:54:00	2022-05-05	08:12:00	144	192	89	13	119	544
hjm004	2022-05-06	2022-05-06	01:11:00	2022-05-06	11:54:00	228	261	137	17	0	626
hjm004	2022-05-07	2022-05-07	00:39:00	2022-05-07	08:36:00	137	252	67	21	84	540
hjm004	2022-05-08	2022-05-08	03:09:00	2022-05-08	13:10:00	161	354	79	7	0	594
hjm004	2022-05-09	2022-05-09	01:48:00	2022-05-09	12:49:00	214	289	144	14	0	647
hjm004	2022-05-10	2022-05-09	23:52:00	2022-05-10	08:12:00	128	265	69	38	103	565
hjm004	2022-05-11	2022-05-11	00:32:00	2022-05-11	10:44:00	128	331	127	26	104	690
hjm004	2022-05-12	2022-05-12	00:42:00	2022-05-12	08:12:00	115	267	51	17	100	533
hjm004	2022-05-13	2022-05-13	01:26:00	2022-05-13	11:19:00	135	361	72	25	0	568
hjm004	2022-05-14	2022-05-14	00:44:00	2022-05-14	08:42:00	105	340	25	8	115	585
hjm004	2022-05-15	2022-05-15	01:53:00	2022-05-15	12:52:00	232	269	147	11	0	648
hjm004	2022-05-16	2022-05-16	01:20:00	2022-05-16	12:07:00	150	365	106	26	0	621
hjm004	2022-05-17	2022-05-17	00:56:00	2022-05-17	08:12:00	105	247	40	44	97	489
hjm004	2022-05-18	2022-05-18	03:20:00	2022-05-18	11:14:00	120	271	73	10	31	495
hjm004	2022-05-19	2022-05-19	00:28:00	2022-05-19	08:12:00	109	277	67	11	116	569
hjm004	2022-05-20	2022-05-20	01:08:00	2022-05-20	11:14:00	194	315	88	9	0	597
hjm004	2022-05-21	2022-05-21	00:40:00	2022-05-21	07:14:00	65	256	73	0	111	505
hjm004	2022-05-23	2022-05-23	01:40:00	2022-05-23	11:00:00	116	292	119	33	81	608
hjm004	2022-05-24	2022-05-24	00:34:00	2022-05-24	08:12:00	102	241	98	17	0	441
hjm004	2022-05-25	2022-05-25	01:31:00	2022-05-25	10:54:00	142	309	78	34	0	529
hjm004	2022-05-26	2022-05-26	01:03:00	2022-05-26	11:08:00	150	355	96	4	19	620
hjm004	2022-05-27	2022-05-27	02:23:00	2022-05-27	11:19:00	112	308	83	33	0	503
hjm004	2022-05-28	2022-05-28	00:39:00	2022-05-28	08:42:00	132	287	54	10	77	550
hjm004	2022-05-29	2022-05-29	08:40:00	2022-05-29	12:23:00	65	103	55	0	0	223
hjm004	2022-05-30	2022-05-30	02:12:00	2022-05-30	09:22:00	98	272	60	0	115	545
hjm004	2022-05-31	2022-05-31	01:04:00	2022-05-31	08:09:00	90	279	42	14	114	525
hjm004	2022-05-31	2022-05-31	01:04:00	2022-05-31	08:09:00	90	279	42	14	114	525
hjm004	2022-06-01	2022-06-01	01:22:00	2022-06-01	07:50:00	105	229	54	0	109	497
hjm004	2022-06-02	2022-06-02	01:13:00	2022-06-02	08:12:00	98	229	77	15	0	404
hjm004	2022-06-03	2022-06-03	01:08:00	2022-06-03	11:54:00	163	352	127	4	0	642
hjm004	2022-06-04	2022-06-04	01:54:00	2022-06-04	10:43:00	139	301	81	8	0	521
hjm004	2022-06-05	2022-06-05	02:03:00	2022-06-05	09:52:00	128	229	105	7	0	462
hjm004	2022-06-06	2022-06-06	01:13:00	2022-06-06	12:12:00	153	396	105	5	0	654
hjm004	2022-06-07	2022-06-06	23:56:00	2022-06-07	08:12:00	139	327	17	13	117	600
hjm004	2022-06-08	2022-06-08	00:25:00	2022-06-08	10:46:00	155	357	52	57	0	564
hjm004	2022-06-09	2022-06-09	01:32:00	2022-06-09	08:12:00	89	230	67	14	107	493
hjm004	2022-06-10	2022-06-10	00:23:00	2022-06-10	07:06:00	96	237	70	0	0	403
hjm004	2022-06-11	2022-06-11	00:06:00	2022-06-11	08:39:00	104	282	76	51	137	599
hjm004	2022-06-12	2022-06-12	01:10:00	2022-06-12	08:56:00	105	240	111	10	0	456
hjm004	2022-06-13	2022-06-12	23:43:00	2022-06-13	07:14:00	137	222	87	5	78	524
hjm004	2022-06-14	2022-06-13	23:46:00	2022-06-14	08:12:00	100	246	142	18	164	652
hjm004	2022-06-16	2022-06-16	00:18:00	2022-06-16	07:19:00	117	230	74	0	0	421
hjm004	2022-06-17	2022-06-17	00:05:00	2022-06-17	06:31:00	133	170	83	0	0	386
hjm004	2022-06-18	2022-06-17	23:59:00	2022-06-18	08:40:00	91	349	58	23	132	630
hjm004	2022-06-19	2022-06-19	01:30:00	2022-06-19	07:18:00	103	188	56	1	20	367
hjm004	2022-06-20	2022-06-19	23:58:00	2022-06-20	07:17:00	120	195	123	1	115	553
hjm004	2022-06-21	2022-06-21	00:25:00	2022-06-21	08:42:00	131	269	64	33	129	593
hjm004	2022-06-22	2022-06-22	00:08:00	2022-06-22	08:42:00	73	299	107	35	72	551
hjm004	2022-06-23	2022-06-22	23:43:00	2022-06-23	08:13:00	121	268	92	29	142	623
hjm004	2022-06-24	2022-06-23	23:46:00	2022-06-24	07:00:00	108	241	82	3	146	577
hjm004	2022-06-25	2022-06-25	00:02:00	2022-06-25	08:42:00	106	320	74	20	36	536
hjm004	2022-06-27	2022-06-27	00:06:00	2022-06-27	08:37:00	127	270	52	62	109	558
hjm004	2022-06-28	2022-06-28	00:03:00	2022-06-28	08:42:00	119	257	87	56	112	575
hjm004	2022-06-29	2022-06-29	00:12:00	2022-06-29	08:37:00	103	240	79	83	77	499
hjm004	2022-06-30	2022-06-30	02:11:00	2022-06-30	08:42:00	120	180	73	18	123	496
hjm004	2022-06-30	2022-06-30	02:11:00	2022-06-30	08:42:00	120	180	73	18	123	496
hjm004	2022-07-01	2022-07-01	00:04:00	2022-07-01	08:41:00	141	236	115	25	58	550
hjm004	2022-07-02	2022-07-01	23:47:00	2022-07-02	08:42:00	91	256	168	20	146	661
hjm004	2022-07-04	2022-07-04	00:27:00	2022-07-04	08:42:00	127	247	98	23	138	610
hjm004	2022-07-05	2022-07-04	23:59:00	2022-07-05	08:42:00	134	213	97	79	103	547
hjm004	2022-07-06	2022-07-06	00:11:00	2022-07-06	08:41:00	143	220	132	15	67	562
hjm004	2022-07-07	2022-07-06	23:42:00	2022-07-07	08:42:00	113	259	148	20	132	652
hjm004	2022-07-08	2022-07-07	23:50:00	2022-07-08	08:41:00	171	219	118	23	33	541
hjm004	2022-07-09	2022-07-08	23:50:00	2022-07-09	08:42:00	160	214	135	23	157	666
hjm004	2022-07-12	2022-07-11	23:53:00	2022-07-12	08:42:00	155	229	118	27	128	630
hjm004	2022-07-13	2022-07-13	00:14:00	2022-07-13	08:42:00	118	279	84	27	84	565
hjm004	2022-07-14	2022-07-13	23:49:00	2022-07-14	07:49:00	134	176	133	37	123	566
hjm004	2022-07-15	2022-07-14	23:49:00	2022-07-15	08:42:00	125	272	120	16	106	623
hjm004	2022-07-18	2022-07-18	00:15:00	2022-07-18	08:42:00	144	220	110	33	123	597
hjm004	2022-07-20	2022-07-20	00:08:00	2022-07-20	08:12:00	132	242	93	17	64	531
hjm004	2022-07-21	2022-07-21	00:44:00	2022-07-21	07:16:00	91	235	64	2	190	580
hjm004	2022-07-22	2022-07-22	00:20:00	2022-07-22	10:44:00	199	244	165	16	20	628
hjm004	2022-07-23	2022-07-23	00:38:00	2022-07-23	08:29:00	124	299	30	18	0	453
hjm004	2022-07-25	2022-07-25	00:04:00	2022-07-25	08:42:00	140	248	113	17	123	624
hjm004	2022-07-26	2022-07-26	00:17:00	2022-07-26	07:16:00	94	230	84	11	148	556
hjm004	2022-07-27	2022-07-27	00:23:00	2022-07-27	08:42:00	110	276	96	17	111	593
hjm004	2022-07-28	2022-07-28	00:33:00	2022-07-28	08:42:00	128	244	98	19	106	576
hjm004	2022-07-29	2022-07-29	00:17:00	2022-07-29	10:08:00	174	309	93	15	22	598
hjm004	2022-07-30	2022-07-30	00:40:00	2022-07-30	08:42:00	157	202	105	18	151	615
hjm004	2022-07-30	2022-07-30	00:40:00	2022-07-30	08:42:00	157	202	105	18	151	615
hjm004	2022-08-01	2022-08-01	01:09:00	2022-08-01	08:42:00	126	232	81	14	112	551
hjm004	2022-08-02	2022-08-02	00:55:00	2022-08-02	08:27:00	109	199	106	38	0	414
hjm004	2022-08-04	2022-08-04	00:43:00	2022-08-04	08:42:00	166	191	102	20	0	459
hjm004	2022-08-05	2022-08-05	00:16:00	2022-08-05	08:42:00	67	301	113	25	100	581
hjm004	2022-08-10	2022-08-10	00:31:00	2022-08-10	10:44:00	170	276	154	13	19	619
hjm004	2022-08-11	2022-08-11	00:33:00	2022-08-11	08:42:00	130	241	99	19	114	584
hjm004	2022-08-12	2022-08-12	00:17:00	2022-08-12	08:24:00	120	224	127	16	117	588
hjm004	2022-08-13	2022-08-13	00:51:00	2022-08-13	05:47:00	105	130	61	0	149	445
hjm004	2022-08-15	2022-08-15	00:55:00	2022-08-15	08:42:00	106	217	121	23	114	558
hjm004	2022-08-16	2022-08-16	00:23:00	2022-08-16	08:19:00	140	199	118	19	116	573
hjm004	2022-08-18	2022-08-18	00:19:00	2022-08-18	07:15:00	91	250	54	21	101	496
hjm004	2022-08-19	2022-08-19	00:30:00	2022-08-19	08:41:00	121	262	98	10	106	587
hjm004	2022-08-20	2022-08-20	00:33:00	2022-08-20	08:42:00	113	315	48	13	113	589
hjm004	2022-08-22	2022-08-22	00:23:00	2022-08-22	08:42:00	112	270	104	13	118	604
hjm004	2022-08-23	2022-08-23	00:13:00	2022-08-23	08:39:00	114	308	69	15	135	626
hjm004	2022-08-24	2022-08-24	00:26:00	2022-08-24	11:54:00	156	426	58	48	18	658
hjm004	2022-08-25	2022-08-25	00:12:00	2022-08-25	08:42:00	138	294	64	14	115	611
hjm004	2022-08-26	2022-08-26	01:04:00	2022-08-26	08:42:00	112	245	93	8	145	595
hjm004	2022-08-27	2022-08-27	00:33:00	2022-08-27	08:42:00	128	324	30	7	0	482
hjm004	2022-09-08	2022-09-08	00:50:00	2022-09-08	08:13:00	107	269	60	7	108	544
hjm004	2022-09-12	2022-09-12	00:34:00	2022-09-12	05:42:00	63	204	41	0	0	308
hjm004	2022-09-13	2022-09-13	00:32:00	2022-09-13	08:12:00	124	255	71	10	119	569
hjm004	2022-09-15	2022-09-15	00:56:00	2022-09-15	08:12:00	96	272	60	8	111	539
hjm004	2022-09-16	2022-09-16	00:23:00	2022-09-16	09:19:00	112	313	43	68	56	524
hjm005	2022-04-04	2022-04-04	02:18:00	2022-04-04	13:19:00	171	368	85	37	0	624
hjm005	2022-04-05	2022-04-04	23:40:00	2022-04-05	08:13:00	187	224	56	46	115	582
hjm005	2022-04-06	2022-04-06	01:15:00	2022-04-06	07:10:00	126	155	74	0	205	560
hjm005	2022-04-07	2022-04-07	00:11:00	2022-04-07	08:44:00	164	178	93	78	88	523
hjm005	2022-04-08	2022-04-08	01:02:00	2022-04-08	11:20:00	167	286	143	22	0	596
hjm005	2022-04-09	2022-04-09	00:52:00	2022-04-09	08:44:00	143	224	35	70	73	475
hjm005	2022-04-10	2022-04-10	02:29:00	2022-04-10	12:17:00	142	349	94	3	0	585
hjm005	2022-04-11	2022-04-11	01:15:00	2022-04-11	07:10:00	104	185	64	2	142	495
hjm005	2022-04-12	2022-04-12	01:19:00	2022-04-12	08:04:00	75	264	47	19	139	525
hjm005	2022-04-13	2022-04-13	01:01:00	2022-04-13	08:22:00	114	236	80	11	97	527
hjm005	2022-04-14	2022-04-14	00:39:00	2022-04-14	08:08:00	141	193	113	2	45	492
hjm005	2022-04-15	2022-04-15	00:57:00	2022-04-15	08:17:00	107	247	75	11	112	541
hjm005	2022-04-16	2022-04-16	00:30:00	2022-04-16	08:17:00	146	208	88	25	99	541
hjm005	2022-04-17	2022-04-17	03:50:00	2022-04-17	14:28:00	166	343	114	15	0	623
hjm005	2022-04-18	2022-04-18	01:43:00	2022-04-18	07:54:00	111	162	84	14	153	510
hjm005	2022-04-20	2022-04-20	01:37:00	2022-04-20	06:54:00	105	194	16	2	0	315
hjm005	2022-04-21	2022-04-21	00:51:00	2022-04-21	08:18:00	151	204	68	24	127	550
hjm005	2022-04-22	2022-04-22	00:54:00	2022-04-22	10:58:00	189	336	59	20	105	689
hjm005	2022-04-30	2022-04-30	02:25:00	2022-04-30	08:39:00	109	145	78	42	0	332
hjm005	2022-04-30	2022-04-30	02:25:00	2022-04-30	08:39:00	109	145	78	42	0	332
hjm005	2022-05-01	2022-05-01	01:51:00	2022-05-01	14:44:00	300	295	166	12	0	761
hjm005	2022-05-02	2022-05-02	02:33:00	2022-05-02	08:21:00	111	144	64	29	187	506
hjm005	2022-05-03	2022-05-03	01:35:00	2022-05-03	07:12:00	96	190	51	0	84	421
hjm005	2022-05-04	2022-05-04	02:03:00	2022-05-04	13:58:00	180	383	122	30	0	685
hjm005	2022-05-05	2022-05-05	02:03:00	2022-05-05	08:15:00	132	150	68	22	132	482
hjm005	2022-05-06	2022-05-06	01:09:00	2022-05-06	10:59:00	154	315	82	39	51	602
hjm005	2022-05-07	2022-05-07	01:42:00	2022-05-07	08:48:00	105	233	62	26	0	400
hjm005	2022-05-08	2022-05-08	03:24:00	2022-05-08	14:52:00	157	389	114	28	0	660
hjm005	2022-05-09	2022-05-09	01:38:00	2022-05-09	08:01:00	139	189	48	7	205	581
hjm005	2022-05-10	2022-05-10	01:58:00	2022-05-10	08:16:00	130	181	47	20	99	457
hjm005	2022-05-12	2022-05-12	01:00:00	2022-05-12	08:13:00	158	176	70	29	108	512
hjm005	2022-05-13	2022-05-13	00:49:00	2022-05-13	11:00:00	168	291	151	1	43	653
hjm005	2022-05-14	2022-05-14	02:16:00	2022-05-14	08:44:00	89	201	41	57	122	453
hjm005	2022-05-15	2022-05-15	03:04:00	2022-05-15	10:59:00	151	281	39	4	112	583
hjm005	2022-05-16	2022-05-16	01:46:00	2022-05-16	11:01:00	165	220	156	14	100	641
hjm005	2022-05-17	2022-05-17	01:18:00	2022-05-17	07:12:00	101	165	88	0	102	456
hjm005	2022-05-18	2022-05-18	01:44:00	2022-05-18	09:01:00	155	203	73	6	175	606
hjm005	2022-05-19	2022-05-18	23:54:00	2022-05-19	08:13:00	119	190	88	102	128	525
hjm005	2022-05-20	2022-05-20	01:02:00	2022-05-20	12:33:00	177	370	120	24	0	667
hjm005	2022-05-21	2022-05-21	01:40:00	2022-05-21	08:45:00	131	201	77	16	93	502
hjm005	2022-05-22	2022-05-22	02:56:00	2022-05-22	12:01:00	127	295	123	0	34	579
hjm005	2022-05-23	2022-05-23	01:27:00	2022-05-23	07:53:00	100	167	104	15	280	651
hjm005	2022-05-24	2022-05-24	01:32:00	2022-05-24	08:12:00	163	176	35	26	90	464
hjm005	2022-05-25	2022-05-25	02:05:00	2022-05-25	10:54:00	148	263	111	7	0	522
hjm005	2022-05-28	2022-05-28	01:28:00	2022-05-28	08:47:00	137	203	56	43	62	458
hjm005	2022-05-28	2022-05-28	01:28:00	2022-05-28	08:47:00	137	203	56	43	62	458
hjm005	2022-06-01	2022-06-01	01:04:00	2022-06-01	09:15:00	143	273	71	4	153	640
hjm005	2022-06-02	2022-06-02	01:38:00	2022-06-02	08:16:00	91	191	96	20	0	378
hjm005	2022-06-03	2022-06-03	01:18:00	2022-06-03	12:47:00	183	286	96	4	0	565
hjm005	2022-06-06	2022-06-06	01:23:00	2022-06-06	13:47:00	205	372	110	2	0	687
hjm005	2022-06-07	2022-06-07	00:03:00	2022-06-07	06:53:00	103	187	119	1	94	503
hjm005	2022-06-08	2022-06-07	23:58:00	2022-06-08	07:10:00	125	207	100	0	122	554
hjm005	2022-06-09	2022-06-09	01:04:00	2022-06-09	07:00:00	113	192	41	10	120	466
hjm005	2022-06-10	2022-06-10	00:23:00	2022-06-10	07:06:00	108	197	98	0	47	450
hjm005	2022-06-11	2022-06-11	00:05:00	2022-06-11	08:48:00	71	290	134	28	136	631
hjm005	2022-06-13	2022-06-12	23:27:00	2022-06-13	07:04:00	140	189	126	2	64	519
hjm005	2022-06-14	2022-06-14	00:13:00	2022-06-14	08:14:00	73	222	162	24	179	636
hjm005	2022-06-15	2022-06-14	23:55:00	2022-06-15	07:13:00	115	249	74	0	0	438
hjm005	2022-06-16	2022-06-16	00:00:00	2022-06-16	07:11:00	139	196	86	10	0	421
hjm005	2022-06-17	2022-06-16	23:33:00	2022-06-17	07:00:00	149	198	100	0	0	447
hjm005	2022-06-20	2022-06-20	00:35:00	2022-06-20	08:46:00	116	224	129	22	149	618
hjm005	2022-06-21	2022-06-21	01:04:00	2022-06-21	08:49:00	146	184	109	26	123	562
hjm005	2022-06-22	2022-06-21	23:50:00	2022-06-22	07:05:00	130	212	93	0	113	548
hjm005	2022-06-23	2022-06-22	23:50:00	2022-06-23	08:15:00	134	222	127	22	113	596
hjm005	2022-06-24	2022-06-23	23:47:00	2022-06-24	14:16:00	154	394	170	0	0	718
hjm005	2022-06-25	2022-06-24	23:54:00	2022-06-25	07:17:00	132	213	98	0	0	443
hjm005	2022-06-28	2022-06-28	01:43:00	2022-06-28	08:46:00	94	205	42	82	0	341
hjm005	2022-06-30	2022-06-30	00:57:00	2022-06-30	08:45:00	95	221	64	88	0	380
hjm005	2022-06-30	2022-06-30	00:57:00	2022-06-30	08:45:00	95	221	64	88	0	380
hjm005	2022-07-01	2022-07-01	00:04:00	2022-07-01	08:47:00	138	288	62	35	0	488
hjm005	2022-07-02	2022-07-02	01:18:00	2022-07-02	08:42:00	138	196	93	17	0	427
hjm005	2022-07-05	2022-07-05	01:18:00	2022-07-05	08:47:00	127	256	32	34	0	415
hjm005	2022-07-06	2022-07-06	01:06:00	2022-07-06	08:48:00	156	182	110	14	79	527
hjm005	2022-07-07	2022-07-07	00:58:00	2022-07-07	08:30:00	125	253	74	0	131	583
hjm005	2022-07-13	2022-07-13	01:03:00	2022-07-13	08:46:00	133	261	56	13	94	544
hjm005	2022-07-14	2022-07-14	00:40:00	2022-07-14	07:14:00	98	257	37	2	111	503
hjm005	2022-07-15	2022-07-15	00:57:00	2022-07-15	08:42:00	125	240	84	16	116	565
hjm005	2022-07-16	2022-07-16	00:29:00	2022-07-16	07:11:00	101	214	47	40	0	362
hjm005	2022-07-18	2022-07-18	01:10:00	2022-07-18	07:04:00	93	196	65	0	93	447
hjm005	2022-07-19	2022-07-19	01:02:00	2022-07-19	08:46:00	132	282	30	20	0	444
hjm005	2022-07-20	2022-07-20	00:43:00	2022-07-20	08:15:00	128	236	66	22	0	430
hjm005	2022-07-21	2022-07-21	01:18:00	2022-07-21	09:16:00	143	219	116	0	109	587
hjm005	2022-07-23	2022-07-23	01:01:00	2022-07-23	08:42:00	83	176	74	128	0	333
hjm005	2022-07-25	2022-07-25	01:55:00	2022-07-25	08:45:00	140	171	51	48	113	475
hjm005	2022-07-27	2022-07-27	01:25:00	2022-07-27	08:47:00	133	169	83	57	103	488
hjm005	2022-08-09	2022-08-09	00:49:00	2022-08-09	08:42:00	137	277	22	37	139	575
hjm005	2022-08-11	2022-08-11	00:59:00	2022-08-11	08:44:00	111	237	99	18	0	447
hjm005	2022-08-12	2022-08-12	01:06:00	2022-08-12	08:44:00	128	274	39	17	122	563
hjm005	2022-08-13	2022-08-13	01:23:00	2022-08-13	05:47:00	110	115	39	0	0	264
hjm005	2022-08-16	2022-08-16	00:35:00	2022-08-16	08:48:00	127	271	84	11	118	600
hjm005	2022-08-17	2022-08-17	00:29:00	2022-08-17	13:15:00	207	454	82	23	0	743
hjm005	2022-08-18	2022-08-18	01:18:00	2022-08-18	04:51:00	83	99	31	0	0	213
hjm005	2022-08-19	2022-08-19	01:34:00	2022-08-19	08:37:00	138	217	42	26	0	397
hjm005	2022-08-20	2022-08-20	01:29:00	2022-08-20	08:46:00	114	211	69	43	0	394
hjm006	2022-04-04	2022-04-04	01:31:00	2022-04-04	07:54:00	94	219	65	5	111	489
hjm006	2022-04-05	2022-04-05	00:58:00	2022-04-05	08:15:00	133	207	76	21	93	509
hjm006	2022-04-06	2022-04-06	01:47:00	2022-04-06	07:52:00	94	199	63	9	117	473
hjm006	2022-04-07	2022-04-07	00:11:00	2022-04-07	08:43:00	108	316	50	38	76	550
hjm006	2022-04-08	2022-04-08	01:36:00	2022-04-08	08:32:00	140	175	89	12	62	466
hjm006	2022-04-09	2022-04-09	00:43:00	2022-04-09	08:44:00	124	256	74	27	65	519
hjm006	2022-04-10	2022-04-10	03:31:00	2022-04-10	13:02:00	149	313	108	1	0	570
hjm006	2022-04-11	2022-04-11	01:51:00	2022-04-11	07:47:00	87	184	70	15	173	514
hjm006	2022-04-12	2022-04-12	01:27:00	2022-04-12	07:12:00	95	185	62	3	133	475
hjm006	2022-04-13	2022-04-13	01:09:00	2022-04-13	08:21:00	117	268	30	17	146	561
hjm006	2022-04-14	2022-04-14	00:56:00	2022-04-14	08:06:00	100	264	42	24	48	454
hjm006	2022-04-15	2022-04-15	01:00:00	2022-04-15	08:14:00	153	153	106	22	86	498
hjm006	2022-04-16	2022-04-16	00:54:00	2022-04-16	07:04:00	99	191	75	5	53	418
hjm006	2022-04-17	2022-04-17	01:55:00	2022-04-17	10:47:00	141	295	70	26	0	506
hjm006	2022-04-18	2022-04-18	00:46:00	2022-04-18	07:47:00	123	171	114	13	75	483
hjm006	2022-04-19	2022-04-19	01:11:00	2022-04-19	08:11:00	112	201	78	29	128	519
hjm006	2022-04-20	2022-04-20	01:02:00	2022-04-20	07:56:00	65	213	135	1	207	620
hjm006	2022-04-21	2022-04-21	00:59:00	2022-04-21	08:11:00	94	236	74	28	74	478
hjm006	2022-04-22	2022-04-22	02:31:00	2022-04-22	07:25:00	86	172	36	0	156	450
hjm006	2022-04-23	2022-04-23	02:09:00	2022-04-23	08:44:00	91	171	107	26	40	409
hjm006	2022-04-24	2022-04-24	04:05:00	2022-04-24	13:31:00	141	275	136	14	0	552
hjm006	2022-04-25	2022-04-25	02:05:00	2022-04-25	09:01:00	87	206	82	41	97	472
hjm006	2022-04-26	2022-04-26	01:34:00	2022-04-26	08:09:00	139	152	80	24	59	430
hjm006	2022-04-27	2022-04-27	02:10:00	2022-04-27	09:34:00	162	165	105	12	80	512
hjm006	2022-04-28	2022-04-28	01:09:00	2022-04-28	08:14:00	128	188	88	21	70	474
hjm006	2022-04-30	2022-04-30	02:09:00	2022-04-30	12:50:00	188	372	36	45	0	596
hjm006	2022-04-30	2022-04-30	02:09:00	2022-04-30	12:50:00	188	372	36	45	0	596
hjm006	2022-05-01	2022-05-01	04:47:00	2022-05-01	13:53:00	195	212	120	19	0	527
hjm006	2022-05-02	2022-05-02	02:24:00	2022-05-02	12:45:00	155	285	59	16	0	499
hjm006	2022-05-03	2022-05-03	01:13:00	2022-05-03	08:13:00	101	198	85	36	51	435
hjm006	2022-05-04	2022-05-04	01:52:00	2022-05-04	06:21:00	111	95	57	6	242	505
hjm006	2022-05-05	2022-05-05	01:29:00	2022-05-05	08:12:00	116	209	61	17	69	455
hjm006	2022-05-06	2022-05-06	02:19:00	2022-05-06	11:23:00	146	276	112	10	0	534
hjm006	2022-05-08	2022-05-08	03:12:00	2022-05-08	12:26:00	141	338	61	14	0	540
hjm006	2022-05-09	2022-05-09	01:57:00	2022-05-09	13:32:00	148	284	116	16	0	548
hjm006	2022-05-10	2022-05-10	01:37:00	2022-05-10	07:12:00	67	230	19	19	98	414
hjm006	2022-05-11	2022-05-11	02:14:00	2022-05-11	09:34:00	122	228	90	0	88	528
hjm006	2022-05-12	2022-05-12	03:13:00	2022-05-12	08:09:00	87	163	15	31	91	356
hjm006	2022-05-13	2022-05-13	03:06:00	2022-05-13	11:29:00	155	227	106	15	0	488
hjm006	2022-05-15	2022-05-15	04:01:00	2022-05-15	12:54:00	136	324	46	27	0	506
hjm006	2022-05-16	2022-05-16	02:08:00	2022-05-16	07:54:00	106	163	73	4	170	512
hjm006	2022-05-17	2022-05-17	02:01:00	2022-05-17	08:13:00	93	185	68	26	79	425
hjm006	2022-05-18	2022-05-18	01:22:00	2022-05-18	11:52:00	158	337	118	17	5	618
hjm006	2022-05-19	2022-05-19	01:25:00	2022-05-19	08:15:00	91	247	49	23	90	477
hjm006	2022-05-20	2022-05-20	01:42:00	2022-05-20	12:25:00	163	402	54	24	0	619
hjm006	2022-05-22	2022-05-22	03:12:00	2022-05-22	12:16:00	128	288	121	7	0	537
hjm006	2022-05-23	2022-05-23	03:25:00	2022-05-23	13:37:00	160	242	79	12	0	481
hjm006	2022-05-24	2022-05-24	01:09:00	2022-05-24	08:11:00	109	220	68	25	93	490
hjm006	2022-05-25	2022-05-25	02:16:00	2022-05-25	09:34:00	118	208	94	18	0	420
hjm006	2022-05-26	2022-05-26	01:57:00	2022-05-26	11:46:00	167	290	131	1	0	588
hjm006	2022-05-27	2022-05-27	01:36:00	2022-05-27	11:37:00	210	246	133	12	0	589
hjm006	2022-05-28	2022-05-28	02:25:00	2022-05-28	07:17:00	83	112	88	9	0	283
hjm006	2022-05-29	2022-05-29	03:29:00	2022-05-29	13:42:00	184	275	149	5	0	608
hjm006	2022-05-30	2022-05-30	01:53:00	2022-05-30	07:51:00	111	163	78	6	107	459
hjm006	2022-05-31	2022-05-31	01:31:00	2022-05-31	08:13:00	103	210	73	16	0	386
hjm006	2022-05-31	2022-05-31	01:31:00	2022-05-31	08:13:00	103	210	73	16	0	386
hjm006	2022-06-01	2022-06-01	00:47:00	2022-06-01	09:00:00	139	235	104	15	97	575
hjm006	2022-06-02	2022-06-02	02:42:00	2022-06-02	08:16:00	108	164	45	17	0	317
hjm006	2022-06-03	2022-06-03	01:36:00	2022-06-03	07:41:00	129	138	98	0	167	532
hjm006	2022-06-07	2022-06-06	23:52:00	2022-06-07	08:12:00	129	226	132	13	75	562
hjm006	2022-06-08	2022-06-07	23:58:00	2022-06-08	11:25:00	173	392	98	24	60	723
hjm006	2022-06-09	2022-06-09	01:04:00	2022-06-09	07:00:00	82	209	65	0	75	431
hjm006	2022-06-10	2022-06-10	00:23:00	2022-06-10	07:06:00	106	258	39	0	122	525
hjm006	2022-06-11	2022-06-10	23:50:00	2022-06-11	06:23:00	109	220	60	4	84	473
hjm006	2022-06-13	2022-06-12	23:30:00	2022-06-13	07:13:00	127	224	110	2	0	461
hjm006	2022-06-14	2022-06-13	23:48:00	2022-06-14	08:09:00	180	192	104	25	130	606
hjm006	2022-06-15	2022-06-14	23:53:00	2022-06-15	07:13:00	134	182	114	10	0	430
hjm006	2022-06-16	2022-06-16	00:04:00	2022-06-16	07:18:00	157	167	99	11	0	423
hjm006	2022-06-17	2022-06-16	23:33:00	2022-06-17	07:00:00	90	223	134	0	0	447
hjm006	2022-06-18	2022-06-18	00:06:00	2022-06-18	08:42:00	163	227	95	31	71	556
hjm006	2022-06-20	2022-06-20	00:33:00	2022-06-20	07:16:00	100	181	122	0	100	503
hjm006	2022-06-21	2022-06-21	00:57:00	2022-06-21	08:46:00	114	247	91	17	78	530
hjm006	2022-06-22	2022-06-21	23:50:00	2022-06-22	06:51:00	134	186	101	0	63	484
hjm006	2022-06-23	2022-06-22	23:50:00	2022-06-23	08:13:00	79	275	134	15	47	535
hjm006	2022-06-24	2022-06-23	23:47:00	2022-06-24	07:02:00	121	219	95	0	130	565
hjm006	2022-06-25	2022-06-24	23:56:00	2022-06-25	08:39:00	126	280	104	13	0	510
hjm006	2022-06-27	2022-06-26	23:37:00	2022-06-27	06:58:00	109	258	74	0	0	441
hjm006	2022-06-28	2022-06-28	00:20:00	2022-06-28	08:38:00	148	246	81	23	59	534
hjm006	2022-06-29	2022-06-29	00:26:00	2022-06-29	07:12:00	107	265	31	3	86	489
hjm006	2022-06-30	2022-06-30	00:21:00	2022-06-30	08:39:00	128	280	75	15	69	552
hjm006	2022-06-30	2022-06-30	00:21:00	2022-06-30	08:39:00	128	280	75	15	69	552
hjm006	2022-07-01	2022-07-01	00:30:00	2022-07-01	08:30:00	151	203	109	17	0	463
hjm006	2022-07-04	2022-07-04	00:04:00	2022-07-04	08:42:00	144	255	92	27	95	586
hjm006	2022-07-08	2022-07-07	23:50:00	2022-07-08	06:56:00	109	241	73	3	0	423
hjm006	2022-07-11	2022-07-10	23:49:00	2022-07-11	08:41:00	150	257	87	38	105	599
hjm006	2022-07-15	2022-07-14	23:59:00	2022-07-15	08:08:00	147	299	25	18	0	471
hjm006	2022-07-19	2022-07-18	23:52:00	2022-07-19	08:39:00	133	276	105	13	85	599
hjm006	2022-07-20	2022-07-20	00:40:00	2022-07-20	07:15:00	107	230	54	4	0	391
hjm006	2022-07-25	2022-07-25	00:07:00	2022-07-25	08:35:00	109	259	39	101	75	482
hjm006	2022-07-29	2022-07-29	00:21:00	2022-07-29	09:41:00	192	214	130	24	0	536
hjm006	2022-08-06	2022-08-05	23:29:00	2022-08-06	05:37:00	107	219	39	3	0	365
hjm006	2022-08-09	2022-08-09	00:23:00	2022-08-09	04:57:00	84	151	39	0	96	370
zjf001	2022-04-04	2022-04-03	22:30:00	2022-04-04	06:56:00	111	241	134	20	93	579
zjf001	2022-04-05	2022-04-04	22:10:00	2022-04-05	06:33:00	82	281	133	7	80	576
zjf001	2022-04-06	2022-04-05	23:11:00	2022-04-06	05:16:00	88	196	67	14	67	418
zjf001	2022-04-07	2022-04-06	22:52:00	2022-04-07	06:58:00	81	267	132	6	53	533
zjf001	2022-04-08	2022-04-07	23:22:00	2022-04-08	04:25:00	58	172	63	10	44	337
zjf001	2022-04-09	2022-04-08	22:35:00	2022-04-09	06:15:00	68	247	116	29	35	466
zjf001	2022-04-10	2022-04-09	22:41:00	2022-04-10	05:33:00	79	204	98	31	37	418
zjf001	2022-04-11	2022-04-10	21:57:00	2022-04-11	06:52:00	135	275	119	6	140	669
zjf001	2022-04-12	2022-04-11	22:35:00	2022-04-12	06:50:00	123	273	74	25	70	540
zjf001	2022-04-13	2022-04-12	22:13:00	2022-04-13	06:34:00	127	283	85	6	61	556
zjf001	2022-04-14	2022-04-13	22:56:00	2022-04-14	06:53:00	64	285	104	24	49	502
zjf001	2022-04-15	2022-04-14	22:42:00	2022-04-15	07:03:00	145	232	123	1	0	500
zjf001	2022-04-16	2022-04-15	22:27:00	2022-04-16	05:44:00	147	189	98	3	90	524
zjf001	2022-04-17	2022-04-16	23:44:00	2022-04-17	06:52:00	122	229	77	0	38	466
zjf001	2022-04-18	2022-04-17	22:58:00	2022-04-18	09:29:00	138	269	143	81	72	622
zjf001	2022-04-19	2022-04-18	22:58:00	2022-04-19	06:13:00	68	247	116	4	92	523
zjf001	2022-04-20	2022-04-19	22:38:00	2022-04-20	06:51:00	118	219	98	58	115	550
zjf001	2022-04-21	2022-04-20	22:41:00	2022-04-21	06:47:00	74	255	155	2	55	539
zjf001	2022-04-22	2022-04-21	22:49:00	2022-04-22	06:48:00	129	270	77	3	79	555
zjf001	2022-04-23	2022-04-22	23:00:00	2022-04-23	06:41:00	54	256	148	3	36	494
zjf001	2022-04-24	2022-04-23	22:27:00	2022-04-24	06:37:00	45	308	132	5	69	554
zjf001	2022-04-25	2022-04-24	22:43:00	2022-04-25	06:50:00	121	230	131	5	42	524
zjf001	2022-04-26	2022-04-25	22:36:00	2022-04-26	07:01:00	126	280	99	0	74	579
zjf001	2022-04-27	2022-04-26	23:03:00	2022-04-27	05:41:00	116	177	83	22	45	421
zjf001	2022-04-28	2022-04-27	22:59:00	2022-04-28	06:08:00	95	224	110	0	62	491
zjf001	2022-04-29	2022-04-28	22:31:00	2022-04-29	06:25:00	98	245	114	17	78	535
zjf001	2022-04-30	2022-04-29	22:49:00	2022-04-30	07:00:00	61	256	118	56	20	455
zjf001	2022-04-30	2022-04-29	22:49:00	2022-04-30	07:00:00	61	256	118	56	20	455
zjf001	2022-05-01	2022-04-30	23:09:00	2022-05-01	06:35:00	80	246	113	7	15	454
zjf001	2022-05-02	2022-05-01	23:09:00	2022-05-02	07:01:00	159	222	91	0	47	519
zjf001	2022-05-03	2022-05-02	22:11:00	2022-05-03	07:01:00	173	243	110	4	27	553
zjf001	2022-05-04	2022-05-03	22:20:00	2022-05-04	06:32:00	73	287	132	0	61	553
zjf001	2022-05-05	2022-05-04	22:31:00	2022-05-05	07:00:00	75	285	146	3	86	592
zjf001	2022-05-06	2022-05-05	22:06:00	2022-05-06	06:32:00	106	263	134	3	28	531
zjf001	2022-05-07	2022-05-06	22:31:00	2022-05-07	06:34:00	128	223	106	26	23	480
zjf001	2022-05-09	2022-05-08	22:59:00	2022-05-09	06:41:00	121	215	126	0	96	558
zjf001	2022-05-10	2022-05-09	23:47:00	2022-05-10	07:01:00	65	242	115	12	65	487
zjf001	2022-05-11	2022-05-11	00:11:00	2022-05-11	05:57:00	86	180	80	0	80	426
zjf001	2022-05-12	2022-05-11	22:55:00	2022-05-12	06:44:00	40	248	113	68	46	447
zjf001	2022-05-13	2022-05-12	23:15:00	2022-05-13	07:00:00	139	176	67	83	68	450
zjf001	2022-05-14	2022-05-13	23:22:00	2022-05-14	06:06:00	108	184	99	13	79	470
zjf001	2022-05-15	2022-05-14	23:55:00	2022-05-15	06:06:00	90	177	104	0	27	398
zjf001	2022-05-16	2022-05-15	21:33:00	2022-05-16	06:57:00	99	300	140	25	102	641
zjf001	2022-05-17	2022-05-16	22:12:00	2022-05-17	06:52:00	138	238	135	9	62	573
zjf001	2022-05-18	2022-05-17	22:01:00	2022-05-18	06:46:00	119	317	89	0	45	570
zjf001	2022-05-19	2022-05-18	22:26:00	2022-05-19	06:59:00	151	222	98	42	107	578
zjf001	2022-05-20	2022-05-19	22:32:00	2022-05-20	06:20:00	161	197	105	5	65	528
zjf001	2022-05-21	2022-05-20	22:53:00	2022-05-21	05:51:00	110	207	101	0	84	502
zjf001	2022-05-22	2022-05-21	23:01:00	2022-05-22	06:26:00	160	196	79	10	54	489
zjf001	2022-05-23	2022-05-22	22:59:00	2022-05-23	06:30:00	91	253	106	1	0	450
zjf001	2022-05-24	2022-05-23	22:33:00	2022-05-24	08:09:00	91	284	96	105	65	536
zjf001	2022-05-25	2022-05-24	22:21:00	2022-05-25	06:38:00	162	230	101	4	0	493
zjf001	2022-05-27	2022-05-26	21:13:00	2022-05-27	06:51:00	139	278	160	1	99	676
zjf001	2022-05-28	2022-05-27	22:41:00	2022-05-28	06:28:00	142	203	113	9	57	515
zjf001	2022-05-29	2022-05-28	23:51:00	2022-05-29	03:14:00	70	101	29	3	0	200
zjf001	2022-05-30	2022-05-29	23:48:00	2022-05-30	06:50:00	108	214	98	2	150	570
zjf001	2022-05-31	2022-05-30	22:43:00	2022-05-31	06:56:00	175	216	97	5	63	551
zjf001	2022-05-31	2022-05-30	22:43:00	2022-05-31	06:56:00	175	216	97	5	63	551
zjf001	2022-06-01	2022-05-31	22:08:00	2022-06-01	05:30:00	106	246	78	12	117	547
zjf001	2022-06-02	2022-06-01	22:35:00	2022-06-02	06:54:00	112	246	140	1	85	583
zjf001	2022-06-03	2022-06-02	22:36:00	2022-06-03	06:43:00	96	262	125	4	106	589
zjf001	2022-06-04	2022-06-03	22:27:00	2022-06-04	05:19:00	121	189	69	33	69	448
zjf001	2022-06-05	2022-06-04	22:22:00	2022-06-05	06:49:00	57	288	145	17	0	490
zjf001	2022-06-06	2022-06-05	22:42:00	2022-06-06	07:01:00	99	271	128	1	88	586
zjf001	2022-06-07	2022-06-06	23:03:00	2022-06-07	08:42:00	171	236	86	86	108	601
zjf001	2022-06-08	2022-06-07	23:24:00	2022-06-08	06:54:00	102	285	61	2	52	500
zjf001	2022-06-09	2022-06-08	23:03:00	2022-06-09	06:32:00	143	206	92	8	70	511
zjf001	2022-06-10	2022-06-09	23:03:00	2022-06-10	07:03:00	105	254	114	7	57	530
zjf001	2022-06-11	2022-06-10	22:14:00	2022-06-11	07:18:00	159	244	134	7	44	581
zjf001	2022-06-12	2022-06-11	23:08:00	2022-06-12	07:13:00	71	260	110	44	45	486
zjf001	2022-06-13	2022-06-12	23:07:00	2022-06-13	06:19:00	101	254	71	6	194	620
zjf001	2022-06-14	2022-06-13	23:09:00	2022-06-14	05:03:00	93	194	67	0	85	439
zjf001	2022-06-15	2022-06-14	23:27:00	2022-06-15	05:30:00	88	181	94	0	105	468
zjf001	2022-06-16	2022-06-15	22:34:00	2022-06-16	06:40:00	115	269	86	16	174	644
zjf001	2022-06-17	2022-06-16	23:10:00	2022-06-17	07:40:00	169	203	91	47	0	463
zjf001	2022-06-18	2022-06-18	00:01:00	2022-06-18	07:12:00	97	217	110	7	33	457
zjf001	2022-06-19	2022-06-18	23:21:00	2022-06-19	07:20:00	57	255	123	44	165	600
zjf001	2022-06-20	2022-06-19	22:20:00	2022-06-20	07:33:00	83	308	151	11	87	629
zjf001	2022-06-21	2022-06-20	22:46:00	2022-06-21	06:33:00	110	242	115	0	77	544
zjf001	2022-06-22	2022-06-21	22:35:00	2022-06-22	07:25:00	70	270	118	72	67	525
zjf001	2022-06-23	2022-06-22	23:25:00	2022-06-23	08:44:00	71	262	149	77	117	599
zjf001	2022-06-24	2022-06-23	23:36:00	2022-06-24	06:18:00	68	240	94	0	99	501
zjf001	2022-06-25	2022-06-24	22:40:00	2022-06-25	06:50:00	63	257	141	29	19	480
zjf001	2022-06-27	2022-06-26	22:15:00	2022-06-27	07:29:00	141	284	121	8	97	643
zjf001	2022-06-28	2022-06-27	22:23:00	2022-06-28	06:40:00	164	241	88	4	82	575
zjf001	2022-06-29	2022-06-28	23:09:00	2022-06-29	06:49:00	150	219	77	14	137	583
zjf001	2022-06-30	2022-06-29	22:56:00	2022-06-30	06:49:00	103	233	122	15	91	549
zjf001	2022-06-30	2022-06-29	22:56:00	2022-06-30	06:49:00	103	233	122	15	91	549
zjf001	2022-07-01	2022-06-30	23:34:00	2022-07-01	08:41:00	136	213	89	109	40	478
zjf001	2022-07-02	2022-07-01	22:09:00	2022-07-02	06:50:00	174	254	93	0	96	617
zjf001	2022-07-03	2022-07-02	23:03:00	2022-07-03	07:13:00	73	244	129	44	0	446
zjf001	2022-07-04	2022-07-03	22:18:00	2022-07-04	07:23:00	120	262	159	4	82	623
zjf001	2022-07-05	2022-07-04	22:53:00	2022-07-05	05:54:00	114	207	100	0	93	514
zjf001	2022-07-06	2022-07-05	22:35:00	2022-07-06	07:12:00	88	281	148	0	67	584
zjf001	2022-07-07	2022-07-06	22:56:00	2022-07-07	05:46:00	132	179	99	0	0	410
zjf001	2022-07-08	2022-07-07	23:08:00	2022-07-08	08:44:00	116	280	89	91	0	485
zjf001	2022-07-09	2022-07-08	22:41:00	2022-07-09	06:35:00	131	273	70	0	35	509
zjf001	2022-07-11	2022-07-10	21:40:00	2022-07-11	08:07:00	147	309	141	30	78	675
zjf001	2022-07-12	2022-07-11	21:35:00	2022-07-12	06:54:00	135	294	130	0	94	653
zjf001	2022-07-13	2022-07-12	22:34:00	2022-07-13	07:41:00	139	254	130	24	59	582
zjf001	2022-07-14	2022-07-13	22:49:00	2022-07-14	06:47:00	113	249	115	1	47	524
zjf001	2022-07-15	2022-07-14	22:37:00	2022-07-15	08:42:00	138	265	121	81	44	568
zjf001	2022-07-16	2022-07-15	22:40:00	2022-07-16	06:51:00	176	223	86	6	20	505
zjf001	2022-07-18	2022-07-17	22:18:00	2022-07-18	08:07:00	127	299	113	50	91	630
zjf001	2022-07-19	2022-07-18	23:16:00	2022-07-19	08:07:00	78	270	110	73	43	501
zjf001	2022-07-20	2022-07-19	23:00:00	2022-07-20	08:32:00	74	258	139	101	0	471
zjf001	2022-07-21	2022-07-20	23:01:00	2022-07-21	06:50:00	174	177	100	18	74	525
zjf001	2022-07-22	2022-07-21	22:50:00	2022-07-22	08:29:00	108	315	64	92	0	487
zjf001	2022-07-25	2022-07-24	23:44:00	2022-07-25	06:43:00	120	207	86	6	99	512
zjf001	2022-07-27	2022-07-26	23:24:00	2022-07-27	06:11:00	89	242	76	0	204	611
zjf001	2022-07-28	2022-07-27	23:16:00	2022-07-28	06:15:00	133	200	86	0	94	513
zjf001	2022-07-29	2022-07-28	23:11:00	2022-07-29	07:08:00	136	224	103	14	53	516
zjf001	2022-07-30	2022-07-29	22:04:00	2022-07-30	07:11:00	172	260	115	0	62	609
zjf001	2022-07-31	2022-07-30	23:27:00	2022-07-31	06:37:00	103	241	84	2	45	473
zjf001	2022-07-31	2022-07-30	23:27:00	2022-07-31	06:37:00	103	241	84	2	45	473
zjf001	2022-08-03	2022-08-02	22:40:00	2022-08-03	06:55:00	123	227	135	10	0	485
zjf001	2022-08-04	2022-08-03	22:52:00	2022-08-04	06:49:00	123	264	90	0	92	569
zjf001	2022-08-05	2022-08-05	00:26:00	2022-08-05	04:04:00	62	99	57	0	150	368
zjf001	2022-08-06	2022-08-05	22:32:00	2022-08-06	07:00:00	95	339	68	6	25	527
zjf001	2022-08-08	2022-08-07	21:56:00	2022-08-08	06:05:00	91	264	134	0	76	565
zjf001	2022-08-09	2022-08-08	22:43:00	2022-08-09	08:09:00	43	493	30	0	70	636
zjf001	2022-08-10	2022-08-09	22:47:00	2022-08-10	06:28:00	87	232	72	70	95	486
zjf001	2022-08-11	2022-08-10	23:08:00	2022-08-11	05:54:00	99	255	48	4	0	402
zjf001	2022-08-12	2022-08-11	22:44:00	2022-08-12	06:35:00	149	212	110	0	71	542
zjf001	2022-08-14	2022-08-13	22:04:00	2022-08-14	07:40:00	161	270	124	21	0	555
zjf001	2022-08-15	2022-08-14	22:29:00	2022-08-15	07:11:00	138	268	109	7	104	619
zjf001	2022-08-16	2022-08-15	23:07:00	2022-08-16	07:08:00	85	363	20	13	89	557
zjf001	2022-08-17	2022-08-16	22:46:00	2022-08-17	05:52:00	87	261	45	33	0	393
zjf001	2022-08-18	2022-08-17	22:58:00	2022-08-18	06:56:00	144	235	71	28	79	529
zjf001	2022-08-19	2022-08-18	22:58:00	2022-08-19	07:06:00	76	343	69	0	65	553
zjf001	2022-08-20	2022-08-19	23:01:00	2022-08-20	02:41:00	39	162	3	16	0	204
zjf001	2022-08-23	2022-08-22	22:37:00	2022-08-23	06:41:00	171	223	90	0	88	572
zjf001	2022-08-24	2022-08-23	23:19:00	2022-08-24	07:34:00	87	259	78	71	127	551
zjf001	2022-08-25	2022-08-24	23:40:00	2022-08-25	06:46:00	71	266	75	14	0	412
zjf001	2022-09-13	2022-09-12	21:58:00	2022-09-13	06:47:00	174	240	95	20	0	509
zjf001	2022-09-14	2022-09-13	22:40:00	2022-09-14	06:31:00	131	237	86	17	170	624
zjf001	2022-09-15	2022-09-15	00:35:00	2022-09-15	06:47:00	98	221	43	10	65	427
zjf001	2022-09-16	2022-09-15	23:45:00	2022-09-16	09:23:00	100	285	113	80	35	533
zjf001	2022-09-18	2022-09-17	22:48:00	2022-09-18	07:27:00	129	258	132	0	0	519
zjf001	2022-09-19	2022-09-18	22:41:00	2022-09-19	06:43:00	140	247	94	1	186	667
zjf002	2022-04-04	2022-04-04	00:04:00	2022-04-04	09:41:00	131	376	70	0	100	677
zjf002	2022-04-05	2022-04-04	22:13:00	2022-04-05	06:56:00	194	238	80	11	139	651
zjf002	2022-04-06	2022-04-05	23:10:00	2022-04-06	09:00:00	198	260	132	0	50	640
zjf002	2022-04-07	2022-04-06	23:03:00	2022-04-07	06:56:00	201	202	70	0	0	473
zjf002	2022-04-08	2022-04-07	22:59:00	2022-04-08	08:39:00	155	317	96	12	75	643
zjf002	2022-04-09	2022-04-08	21:26:00	2022-04-09	07:49:00	269	268	63	23	65	665
zjf002	2022-04-10	2022-04-10	00:26:00	2022-04-10	10:51:00	292	278	55	0	0	625
zjf002	2022-04-11	2022-04-10	23:04:00	2022-04-11	10:06:00	328	283	40	11	0	651
zjf002	2022-04-12	2022-04-11	23:24:00	2022-04-12	06:57:00	195	197	61	0	69	522
zjf002	2022-04-13	2022-04-12	22:16:00	2022-04-13	09:31:00	249	254	158	14	0	661
zjf002	2022-04-14	2022-04-13	22:18:00	2022-04-14	07:28:00	156	295	99	0	68	618
zjf002	2022-04-15	2022-04-14	21:30:00	2022-04-15	07:29:00	275	261	59	4	0	595
zjf002	2022-04-16	2022-04-15	22:39:00	2022-04-16	07:34:00	221	226	88	0	118	653
zjf002	2022-04-17	2022-04-16	23:42:00	2022-04-17	07:35:00	251	196	26	0	58	531
zjf002	2022-04-18	2022-04-18	00:22:00	2022-04-18	10:55:00	198	300	132	3	41	671
zjf002	2022-04-19	2022-04-18	21:42:00	2022-04-19	06:56:00	213	262	79	0	0	554
zjf002	2022-04-20	2022-04-19	21:47:00	2022-04-20	10:43:00	392	268	116	0	0	776
zjf002	2022-04-21	2022-04-20	21:50:00	2022-04-21	06:52:00	239	249	53	1	55	596
zjf002	2022-04-22	2022-04-21	21:14:00	2022-04-22	10:40:00	290	345	171	0	0	806
zjf002	2022-04-23	2022-04-22	23:10:00	2022-04-23	06:52:00	169	205	85	3	0	459
zjf002	2022-04-24	2022-04-23	22:23:00	2022-04-24	12:16:00	367	328	136	2	72	903
zjf002	2022-04-25	2022-04-24	21:49:00	2022-04-25	08:47:00	237	301	108	12	48	694
zjf002	2022-04-26	2022-04-25	22:42:00	2022-04-26	08:05:00	257	208	72	26	105	642
zjf002	2022-04-27	2022-04-26	22:23:00	2022-04-27	11:00:00	322	317	115	3	26	780
zjf002	2022-04-28	1970-01-01	08:00:00	2022-04-28	20:00:00	270	235	114	20	0	619
zjf002	2022-04-29	1970-01-01	08:00:00	2022-04-29	07:01:00	228	254	168	11	177	827
zjf002	2022-04-30	2022-04-30	00:15:00	2022-04-30	08:07:00	183	187	79	23	46	495
zjf002	2022-05-01	2022-05-01	00:03:00	2022-05-01	14:46:00	287	409	179	8	163	1038
zjf002	2022-05-02	2022-05-01	22:35:00	2022-05-02	11:33:00	290	274	131	10	15	710
zjf002	2022-05-03	2022-05-02	22:30:00	2022-05-03	08:07:00	118	287	147	25	40	592
zjf002	2022-05-04	2022-05-04	00:00:00	2022-05-04	06:22:00	126	189	63	4	148	526
zjf002	2022-05-05	2022-05-04	23:06:00	2022-05-05	08:05:00	111	343	59	26	76	589
zjf002	2022-05-06	2022-05-05	23:06:00	2022-05-06	07:30:00	127	287	90	0	28	532
zjf002	2022-05-07	2022-05-06	21:57:00	2022-05-07	06:53:00	222	247	67	0	86	622
zjf002	2022-05-08	2022-05-07	23:49:00	2022-05-08	18:28:00	327	464	244	3	71	1106
zjf002	2022-05-09	2022-05-08	23:16:00	2022-05-09	06:50:00	70	311	73	0	0	454
zjf002	2022-05-10	1970-01-01	08:00:00	2022-05-10	20:00:00	283	273	123	40	107	786
zjf002	2022-05-11	1970-01-01	08:00:00	2022-05-11	12:45:00	212	467	261	65	0	940
zjf002	2022-05-12	2022-05-11	21:27:00	2022-05-12	08:06:00	225	261	109	44	82	677
zjf002	2022-05-13	2022-05-12	20:08:00	2022-05-13	11:07:00	235	444	168	52	26	873
zjf002	2022-05-14	2022-05-13	22:42:00	2022-05-14	08:06:00	220	244	64	36	113	641
zjf002	2022-05-15	1970-01-01	08:00:00	2022-05-14	20:00:00	277	862	118	7	0	1257
zjf002	2022-05-16	1970-01-01	08:00:00	2022-05-16	20:00:00	354	402	184	0	0	940
zjf002	2022-05-17	1970-01-01	08:00:00	2022-05-17	08:47:00	339	278	97	53	218	932
zjf002	2022-05-18	1970-01-01	08:00:00	2022-05-17	20:00:00	320	306	137	84	80	843
zjf002	2022-05-19	1970-01-01	08:00:00	2022-05-19	20:00:00	0	0	0	0	0	0
zjf002	2022-05-20	1970-01-01	08:00:00	2022-05-20	11:03:00	291	306	190	116	51	838
zjf002	2022-05-21	2022-05-20	22:36:00	2022-05-21	06:52:00	222	217	51	6	88	578
zjf002	2022-05-22	2022-05-21	22:09:00	2022-05-22	19:19:00	427	467	232	93	0	1126
zjf002	2022-05-23	2022-05-22	22:02:00	2022-05-23	11:10:00	285	333	167	3	17	802
zjf002	2022-05-24	2022-05-23	22:36:00	2022-05-24	08:10:00	249	228	65	32	0	542
zjf002	2022-05-25	2022-05-24	20:33:00	2022-05-25	09:55:00	185	372	239	6	0	796
zjf002	2022-05-27	2022-05-26	22:43:00	2022-05-27	11:02:00	293	299	122	25	0	714
zjf002	2022-05-28	2022-05-27	23:06:00	2022-05-28	08:05:00	207	208	96	28	0	511
zjf002	2022-05-29	2022-05-28	22:47:00	2022-05-29	14:56:00	294	429	238	8	95	1056
zjf002	2022-05-30	2022-05-29	23:47:00	2022-05-30	11:16:00	272	314	99	4	0	685
zjf002	2022-05-30	2022-05-29	23:47:00	2022-05-30	11:16:00	272	314	99	4	0	685
zjf002	2022-05-31	2022-05-30	22:27:00	2022-05-31	06:56:00	176	258	75	0	80	589
zjf002	2022-06-01	2022-05-31	20:56:00	2022-06-01	10:59:00	281	361	192	9	20	854
zjf002	2022-06-02	2022-06-01	22:15:00	2022-06-02	06:58:00	240	200	72	11	87	599
zjf002	2022-06-03	2022-06-02	22:06:00	2022-06-03	11:08:00	299	370	111	2	0	780
zjf002	2022-06-04	2022-06-03	22:56:00	2022-06-04	06:55:00	204	192	83	0	0	479
zjf002	2022-06-06	2022-06-05	22:50:00	2022-06-06	11:36:00	195	430	141	0	18	784
zjf002	2022-06-07	2022-06-06	21:27:00	2022-06-07	08:45:00	233	326	85	34	0	644
zjf002	2022-06-08	2022-06-07	21:33:00	2022-06-08	07:20:00	77	302	191	17	169	739
zjf002	2022-06-09	2022-06-08	20:41:00	2022-06-09	08:42:00	164	350	171	36	0	685
zjf002	2022-06-10	2022-06-09	22:22:00	2022-06-10	11:11:00	279	353	137	0	0	769
zjf002	2022-06-11	2022-06-10	22:38:00	2022-06-11	06:55:00	187	233	77	0	66	563
zjf002	2022-06-12	2022-06-11	22:39:00	2022-06-12	11:27:00	50	630	88	0	0	768
zjf002	2022-06-13	2022-06-12	23:11:00	2022-06-13	07:23:00	157	244	91	0	0	492
zjf002	2022-06-15	2022-06-14	22:46:00	2022-06-15	10:16:00	201	351	125	13	73	750
zjf002	2022-06-16	2022-06-15	23:38:00	2022-06-16	07:15:00	136	222	96	3	0	454
zjf002	2022-06-17	2022-06-16	20:12:00	2022-06-17	08:41:00	235	324	183	7	123	865
zjf002	2022-06-18	2022-06-17	22:34:00	2022-06-18	06:53:00	202	221	54	22	77	554
zjf002	2022-06-19	2022-06-18	23:09:00	2022-06-19	07:38:00	157	231	108	13	0	496
zjf002	2022-06-21	2022-06-20	22:57:00	2022-06-21	08:04:00	245	225	39	38	0	509
zjf002	2022-06-23	2022-06-22	22:28:00	2022-06-23	06:55:00	130	236	138	3	0	504
zjf002	2022-06-24	2022-06-23	20:11:00	2022-06-24	07:13:00	172	289	118	83	94	673
zjf002	2022-06-25	2022-06-24	20:07:00	2022-06-25	06:55:00	259	301	56	32	92	708
zjf002	2022-06-26	2022-06-25	22:14:00	2022-06-26	08:31:00	233	279	105	0	0	617
zjf002	2022-06-28	2022-06-27	22:16:00	2022-06-28	08:04:00	229	252	62	45	101	644
zjf002	2022-06-30	2022-06-29	22:28:00	2022-06-30	08:09:00	219	252	52	58	0	523
zjf002	2022-07-01	2022-06-30	23:01:00	2022-07-01	08:38:00	213	229	75	60	93	610
zjf002	2022-07-02	2022-07-02	01:18:00	2022-07-02	08:02:00	176	166	28	34	161	531
zjf002	2022-07-07	2022-07-06	22:16:00	2022-07-07	08:29:00	219	234	123	37	30	606
zjf002	2022-07-08	2022-07-07	22:05:00	2022-07-08	06:56:00	140	256	135	0	78	609
zjf002	2022-07-09	2022-07-08	23:04:00	2022-07-09	06:53:00	147	215	107	0	35	504
zjf002	2022-07-11	2022-07-10	22:50:00	2022-07-11	08:07:00	153	332	35	37	65	585
zjf002	2022-07-12	2022-07-11	23:10:00	2022-07-12	06:54:00	188	203	73	0	0	464
zjf002	2022-07-13	2022-07-12	21:56:00	2022-07-13	11:05:00	264	335	121	69	14	734
zjf002	2022-07-15	2022-07-14	21:01:00	2022-07-15	08:38:00	289	264	87	57	25	665
zjf002	2022-07-17	2022-07-17	00:11:00	2022-07-17	10:46:00	201	269	165	0	0	635
zjf002	2022-07-18	2022-07-17	22:23:00	2022-07-18	08:05:00	183	226	150	23	112	671
zjf002	2022-07-19	2022-07-18	22:47:00	2022-07-19	06:44:00	169	184	112	12	34	499
zjf002	2022-07-20	2022-07-19	23:32:00	2022-07-20	11:22:00	305	283	63	59	0	651
zjf002	2022-07-22	2022-07-21	22:40:00	2022-07-22	08:36:00	270	209	71	46	0	550
zjf002	2022-07-26	2022-07-25	20:36:00	2022-07-26	07:13:00	220	260	143	14	0	623
zjf002	2022-07-27	2022-07-26	22:05:00	2022-07-27	06:57:00	190	242	80	20	0	512
zjf002	2022-07-28	2022-07-27	22:13:00	2022-07-28	06:53:00	198	207	115	0	0	520
zjf002	2022-07-28	2022-07-27	22:13:00	2022-07-28	06:53:00	197	208	115	0	0	520
zjf002	2022-07-31	2022-07-30	22:24:00	2022-07-31	08:13:00	196	269	114	10	0	579
zjf002	2022-08-02	2022-08-01	21:08:00	2022-08-02	08:09:00	248	265	116	32	0	629
zjf002	2022-08-03	2022-08-02	20:56:00	2022-08-03	07:28:00	239	312	79	2	0	630
zjf002	2022-08-06	2022-08-06	00:52:00	2022-08-06	06:53:00	185	137	39	0	144	505
zjf002	2022-08-07	2022-08-06	23:06:00	2022-08-07	11:29:00	293	287	148	15	243	971
zjf002	2022-08-08	2022-08-07	23:24:00	2022-08-08	08:04:00	195	215	71	39	0	481
zjf002	2022-08-09	2022-08-08	21:41:00	2022-08-09	06:54:00	213	230	86	24	0	529
zjf002	2022-08-11	2022-08-10	22:48:00	2022-08-11	06:53:00	211	212	62	0	0	485
zjf002	2022-08-12	2022-08-11	23:29:00	2022-08-12	06:55:00	189	194	56	7	0	439
zjf002	2022-08-13	2022-08-12	23:58:00	2022-08-13	08:12:00	197	206	91	0	0	494
zjf002	2022-08-14	2022-08-13	21:59:00	2022-08-14	18:04:00	282	548	319	56	0	1149
zjf002	2022-08-16	2022-08-15	22:54:00	2022-08-16	06:55:00	150	227	104	0	0	481
zjf002	2022-08-17	2022-08-16	22:53:00	2022-08-17	09:58:00	279	286	100	0	81	746
zjf002	2022-08-18	2022-08-17	22:01:00	2022-08-18	08:09:00	227	247	98	36	0	572
zjf002	2022-08-19	2022-08-18	22:41:00	2022-08-19	08:08:00	197	256	57	57	0	510
zjf002	2022-08-24	2022-08-23	22:33:00	2022-08-24	10:05:00	296	246	95	55	89	726
zjf002	2022-08-26	2022-08-25	21:46:00	2022-08-26	11:22:00	200	282	133	201	78	693
zjf002	2022-08-27	2022-08-26	22:07:00	2022-08-27	08:09:00	259	291	52	0	0	602
zjf002	2022-08-30	2022-08-29	23:16:00	2022-08-30	07:28:00	124	272	96	0	0	492
zjf002	2022-08-31	2022-08-31	00:22:00	2022-08-31	07:45:00	163	202	78	0	121	564
zjf002	2022-09-14	2022-09-13	23:01:00	2022-09-14	11:20:00	287	277	108	67	37	709
zjf002	2022-09-15	2022-09-14	22:12:00	2022-09-15	08:11:00	222	228	98	51	0	548
zjf002	2022-09-16	2022-09-16	00:59:00	2022-09-16	06:58:00	101	170	35	53	0	306
zjf002	2022-09-17	2022-09-16	23:19:00	2022-09-17	08:09:00	181	199	89	61	0	469
zjf002	2022-09-18	2022-09-17	22:35:00	2022-09-18	01:51:00	0	180	16	0	0	196
zjf003	2022-04-04	2022-04-03	22:46:00	2022-04-04	07:49:00	193	227	100	23	167	687
zjf003	2022-04-05	2022-04-04	22:18:00	2022-04-05	08:05:00	149	295	98	45	97	639
zjf003	2022-04-06	2022-04-05	22:34:00	2022-04-06	08:39:00	148	345	112	0	64	669
zjf003	2022-04-07	2022-04-07	00:40:00	2022-04-07	08:05:00	118	198	94	35	60	470
zjf003	2022-04-08	2022-04-07	23:41:00	2022-04-08	07:40:00	101	313	63	2	79	556
zjf003	2022-04-12	2022-04-11	23:47:00	2022-04-12	08:05:00	64	383	25	26	60	532
zjf003	2022-04-13	2022-04-12	22:56:00	2022-04-13	07:29:00	122	254	136	1	156	668
zjf003	2022-04-14	2022-04-13	23:29:00	2022-04-14	07:33:00	117	269	95	3	56	537
zjf003	2022-04-15	2022-04-14	23:30:00	2022-04-15	08:03:00	153	207	118	35	0	478
zjf003	2022-04-16	2022-04-16	00:49:00	2022-04-16	07:37:00	76	289	25	18	0	390
zjf003	2022-04-17	2022-04-16	22:44:00	2022-04-17	07:00:00	128	286	82	0	67	563
zjf003	2022-04-18	2022-04-17	22:31:00	2022-04-18	06:49:00	125	278	92	3	67	562
zjf003	2022-04-19	2022-04-18	22:54:00	2022-04-19	08:04:00	84	366	53	47	70	573
zjf003	2022-04-20	2022-04-20	00:00:00	2022-04-20	09:00:00	130	332	78	0	0	540
zjf003	2022-04-21	2022-04-20	22:51:00	2022-04-21	06:57:00	118	303	65	0	62	548
zjf003	2022-04-22	2022-04-21	22:15:00	2022-04-22	06:40:00	117	345	42	1	69	573
zjf003	2022-04-23	2022-04-23	00:03:00	2022-04-23	07:30:00	131	225	89	2	42	487
zjf003	2022-04-24	2022-04-23	23:28:00	2022-04-24	09:01:00	136	297	139	1	0	572
zjf003	2022-04-25	2022-04-24	23:00:00	2022-04-25	08:51:00	107	259	159	66	34	559
zjf003	2022-04-26	2022-04-25	22:45:00	2022-04-26	08:06:00	92	284	142	43	67	585
zjf003	2022-04-27	2022-04-27	00:39:00	2022-04-27	10:37:00	189	212	131	66	17	549
zjf003	2022-04-28	2022-04-27	23:01:00	2022-04-28	08:06:00	50	390	28	77	95	563
zjf003	2022-04-29	2022-04-29	01:31:00	2022-04-29	11:12:00	135	299	55	0	16	505
zjf003	2022-04-30	2022-04-29	23:05:00	2022-04-30	07:09:00	100	211	91	82	31	433
zjf003	2022-04-30	2022-04-29	23:05:00	2022-04-30	07:09:00	100	211	91	82	31	433
zjf003	2022-05-01	2022-04-30	23:13:00	2022-05-01	10:45:00	122	521	32	17	36	711
zjf003	2022-05-02	2022-05-01	23:04:00	2022-05-02	11:34:00	187	406	73	1	0	666
zjf003	2022-05-03	2022-05-02	21:58:00	2022-05-03	08:05:00	292	239	37	39	0	568
zjf003	2022-05-04	2022-05-03	22:52:00	2022-05-04	07:34:00	190	222	110	0	150	672
zjf003	2022-05-05	2022-05-04	22:46:00	2022-05-05	08:06:00	204	233	94	29	104	635
zjf003	2022-05-06	2022-05-05	22:30:00	2022-05-06	11:03:00	287	349	117	0	0	753
zjf003	2022-05-07	2022-05-06	23:18:00	2022-05-07	08:07:00	99	287	101	42	41	528
zjf003	2022-05-08	2022-05-07	23:21:00	2022-05-08	09:11:00	102	425	63	0	0	590
zjf003	2022-05-09	2022-05-08	23:25:00	2022-05-09	06:40:00	73	325	36	1	185	619
zjf003	2022-05-10	2022-05-09	23:17:00	2022-05-10	08:05:00	113	316	75	24	104	608
zjf003	2022-05-11	2022-05-10	22:38:00	2022-05-11	07:20:00	138	258	126	0	117	639
zjf003	2022-05-12	2022-05-11	23:56:00	2022-05-12	08:03:00	127	207	119	34	62	515
zjf003	2022-05-13	2022-05-12	22:37:00	2022-05-13	07:10:00	123	298	89	3	197	707
zjf003	2022-05-14	2022-05-13	23:21:00	2022-05-14	06:45:00	122	263	59	0	37	481
zjf003	2022-05-15	2022-05-14	23:23:00	2022-05-15	10:08:00	156	343	111	35	0	610
zjf003	2022-05-16	2022-05-15	23:03:00	2022-05-16	06:56:00	88	260	125	0	59	532
zjf003	2022-05-17	2022-05-16	22:59:00	2022-05-17	08:46:00	149	315	96	27	72	632
zjf003	2022-05-18	2022-05-17	22:31:00	2022-05-18	07:00:00	127	283	99	0	16	525
zjf003	2022-05-19	2022-05-18	22:44:00	2022-05-19	06:58:00	126	266	102	0	96	590
zjf003	2022-05-20	2022-05-19	22:32:00	2022-05-20	07:00:00	162	216	130	0	0	508
zjf003	2022-05-21	2022-05-20	22:31:00	2022-05-21	08:42:00	145	286	123	57	53	607
zjf003	2022-05-22	2022-05-21	22:16:00	2022-05-22	11:03:00	182	470	115	0	22	789
zjf003	2022-05-23	2022-05-22	22:39:00	2022-05-23	11:03:00	155	322	126	5	32	635
zjf003	2022-05-24	2022-05-23	22:15:00	2022-05-24	08:08:00	127	332	41	93	95	595
zjf003	2022-05-25	2022-05-24	22:24:00	2022-05-25	07:05:00	101	337	83	0	0	521
zjf003	2022-05-27	2022-05-26	22:34:00	2022-05-27	06:50:00	142	270	83	1	0	495
zjf003	2022-05-28	2022-05-27	22:31:00	2022-05-28	08:07:00	111	333	95	37	24	563
zjf003	2022-05-29	2022-05-28	23:03:00	2022-05-29	09:53:00	124	414	112	0	0	650
zjf003	2022-05-30	2022-05-29	23:54:00	2022-05-30	06:56:00	67	259	96	0	84	506
zjf003	2022-05-31	2022-05-30	22:59:00	2022-05-31	08:01:00	92	359	59	32	62	572
zjf003	2022-05-31	2022-05-30	22:59:00	2022-05-31	08:01:00	92	359	59	32	62	572
zjf003	2022-06-01	2022-05-31	22:23:00	2022-06-01	07:03:00	110	330	80	0	50	570
zjf003	2022-06-02	2022-06-01	23:36:00	2022-06-02	07:15:00	93	236	130	0	53	512
zjf003	2022-06-03	2022-06-02	22:32:00	2022-06-03	06:50:00	112	312	74	0	44	542
zjf003	2022-06-04	2022-06-03	22:48:00	2022-06-04	06:50:00	143	229	110	0	112	594
zjf003	2022-06-05	2022-06-04	22:45:00	2022-06-05	08:42:00	132	325	117	23	0	574
zjf003	2022-06-06	2022-06-05	22:54:00	2022-06-06	07:37:00	117	363	28	15	0	508
zjf003	2022-06-07	2022-06-06	22:52:00	2022-06-07	08:43:00	146	346	65	34	83	640
zjf003	2022-06-08	2022-06-07	22:51:00	2022-06-08	07:09:00	131	240	127	0	29	527
zjf003	2022-06-09	2022-06-08	22:43:00	2022-06-09	08:44:00	88	415	50	48	82	635
zjf003	2022-06-10	2022-06-09	23:46:00	2022-06-10	07:02:00	116	240	80	0	0	436
zjf003	2022-06-11	2022-06-10	23:19:00	2022-06-11	07:00:00	97	301	63	0	67	528
zjf003	2022-06-12	2022-06-11	22:16:00	2022-06-12	10:00:00	185	469	46	4	0	700
zjf003	2022-06-13	2022-06-12	22:38:00	2022-06-13	06:41:00	108	284	91	0	46	529
zjf003	2022-06-14	2022-06-13	22:43:00	2022-06-14	06:50:00	134	217	136	0	184	671
zjf003	2022-06-15	2022-06-14	22:47:00	2022-06-15	07:00:00	134	285	72	2	0	491
zjf003	2022-06-16	2022-06-15	22:39:00	2022-06-16	07:00:00	144	230	127	0	125	626
zjf003	2022-06-17	2022-06-16	22:57:00	2022-06-17	07:55:00	111	345	57	25	32	545
zjf003	2022-06-18	2022-06-17	23:41:00	2022-06-18	07:13:00	121	303	28	0	94	546
zjf003	2022-06-19	2022-06-18	22:45:00	2022-06-19	09:31:00	120	353	142	31	0	615
zjf003	2022-06-20	2022-06-19	23:41:00	2022-06-20	08:05:00	106	294	47	57	86	533
zjf003	2022-06-21	2022-06-20	22:55:00	2022-06-21	08:05:00	152	312	37	49	72	573
zjf003	2022-06-22	2022-06-21	22:14:00	2022-06-22	06:53:00	122	309	88	0	136	655
zjf003	2022-06-23	2022-06-22	22:28:00	2022-06-23	08:38:00	122	360	42	86	0	524
zjf003	2022-06-24	2022-06-23	22:45:00	2022-06-24	14:45:00	173	427	83	1	0	683
zjf003	2022-06-25	2022-06-24	22:38:00	2022-06-25	06:26:00	116	258	93	1	49	516
zjf003	2022-06-26	2022-06-25	22:15:00	2022-06-26	08:56:00	171	330	140	0	0	641
zjf003	2022-06-27	2022-06-26	23:44:00	2022-06-27	08:09:00	120	244	89	52	36	489
zjf003	2022-06-28	2022-06-27	22:47:00	2022-06-28	08:03:00	118	300	92	46	39	549
zjf003	2022-06-29	2022-06-28	22:01:00	2022-06-29	06:44:00	83	359	81	0	0	523
zjf003	2022-06-30	2022-06-29	23:39:00	2022-06-30	08:10:00	99	288	80	44	48	515
zjf003	2022-06-30	2022-06-29	23:39:00	2022-06-30	08:10:00	99	288	80	44	48	515
zjf003	2022-07-01	2022-06-30	22:45:00	2022-07-01	08:35:00	126	297	101	66	22	546
zjf003	2022-07-02	2022-07-01	22:57:00	2022-07-02	06:45:00	110	278	80	0	23	491
zjf003	2022-07-04	2022-07-03	23:24:00	2022-07-04	08:06:00	194	183	102	43	50	529
zjf003	2022-07-05	2022-07-04	21:42:00	2022-07-05	08:04:00	140	338	97	47	55	630
zjf003	2022-07-06	2022-07-05	22:22:00	2022-07-06	10:47:00	122	422	107	94	0	651
zjf003	2022-07-07	2022-07-06	22:04:00	2022-07-07	08:35:00	158	269	136	68	0	563
zjf003	2022-07-08	2022-07-07	22:25:00	2022-07-08	08:39:00	125	281	131	77	28	565
zjf003	2022-07-09	2022-07-08	22:22:00	2022-07-09	08:10:00	91	393	43	61	0	527
zjf003	2022-07-10	2022-07-09	21:52:00	2022-07-10	08:59:00	138	420	98	11	0	656
zjf003	2022-07-11	2022-07-10	22:26:00	2022-07-11	06:43:00	167	226	104	0	22	519
zjf003	2022-07-12	2022-07-11	22:34:00	2022-07-12	08:09:00	113	363	46	53	57	579
zjf003	2022-07-13	2022-07-12	22:14:00	2022-07-13	10:43:00	158	353	182	56	0	693
zjf003	2022-07-14	2022-07-13	21:54:00	2022-07-14	06:43:00	115	373	35	6	0	523
zjf003	2022-07-15	2022-07-14	22:11:00	2022-07-15	08:39:00	130	300	129	69	18	577
zjf003	2022-07-16	2022-07-15	22:15:00	2022-07-16	06:37:00	109	336	57	0	0	502
zjf003	2022-07-17	2022-07-16	22:44:00	2022-07-17	09:16:00	158	400	57	17	0	615
zjf003	2022-07-18	2022-07-17	22:20:00	2022-07-18	08:10:00	154	356	25	55	36	571
zjf003	2022-07-19	2022-07-18	22:18:00	2022-07-19	08:10:00	125	353	61	53	62	601
zjf003	2022-07-20	2022-07-19	22:16:00	2022-07-20	10:06:00	154	387	114	55	0	655
zjf003	2022-07-22	2022-07-21	21:50:00	2022-07-22	08:20:00	115	364	79	72	34	592
zjf003	2022-07-23	2022-07-22	22:12:00	2022-07-23	06:40:00	137	270	97	4	47	551
zjf003	2022-07-24	2022-07-23	21:42:00	2022-07-24	11:04:00	152	530	116	4	0	798
zjf003	2022-07-25	2022-07-24	22:19:00	2022-07-25	08:08:00	99	284	118	88	0	501
zjf003	2022-07-26	2022-07-25	21:54:00	2022-07-26	06:43:00	142	281	106	0	0	529
zjf003	2022-07-27	2022-07-26	22:24:00	2022-07-27	10:48:00	243	266	167	68	0	676
zjf003	2022-07-28	2022-07-27	21:49:00	2022-07-28	06:43:00	126	279	119	10	64	588
zjf003	2022-07-29	2022-07-28	22:06:00	2022-07-29	08:38:00	129	330	62	111	23	544
zjf003	2022-07-30	2022-07-29	22:25:00	2022-07-30	08:09:00	143	348	48	45	0	539
zjf003	2022-07-30	2022-07-29	22:25:00	2022-07-30	08:09:00	143	348	48	45	0	539
zjf003	2022-07-31	2022-07-30	22:11:00	2022-07-31	07:17:00	171	234	141	0	0	546
zjf003	2022-08-03	2022-08-02	21:37:00	2022-08-03	07:12:00	124	361	72	18	0	557
zjf003	2022-08-09	2022-08-08	22:02:00	2022-08-09	05:53:00	135	277	44	15	72	528
zjf003	2022-08-10	2022-08-09	22:22:00	2022-08-10	10:31:00	143	519	57	10	91	810
zjf003	2022-08-11	2022-08-10	21:19:00	2022-08-11	06:51:00	91	419	56	6	0	566
zjf003	2022-08-12	2022-08-11	23:02:00	2022-08-12	08:10:00	188	221	80	59	0	489
zjf003	2022-08-13	2022-08-12	21:28:00	2022-08-13	08:04:00	145	372	117	2	89	723
zjf003	2022-08-14	2022-08-13	23:22:00	2022-08-14	10:15:00	80	428	139	6	0	647
zjf003	2022-08-15	2022-08-14	22:44:00	2022-08-15	08:44:00	205	287	73	35	0	565
zjf003	2022-08-16	2022-08-15	21:39:00	2022-08-16	08:07:00	150	310	133	35	89	682
zjf003	2022-08-17	2022-08-16	22:54:00	2022-08-17	09:30:00	120	376	117	23	62	675
zjf003	2022-08-18	2022-08-17	22:21:00	2022-08-18	08:10:00	132	304	86	67	49	571
zjf003	2022-08-25	2022-08-25	00:35:00	2022-08-25	08:11:00	173	229	22	32	81	505
zjf003	2022-08-29	2022-08-28	23:39:00	2022-08-29	06:16:00	67	270	60	0	0	397
zjf003	2022-08-31	2022-08-31	07:27:00	2022-08-31	11:29:00	97	107	38	0	151	393
zjf003	2022-09-01	2022-09-01	00:11:00	2022-09-01	05:25:00	133	122	59	0	0	314
zjf003	2022-09-04	2022-09-03	23:15:00	2022-09-04	06:26:00	144	213	70	4	0	427
zjf003	2022-09-13	2022-09-12	22:42:00	2022-09-13	08:11:00	139	327	81	22	67	614
zjf003	2022-09-14	2022-09-13	22:29:00	2022-09-14	06:52:00	145	229	129	0	121	624
zjf003	2022-09-15	2022-09-14	22:15:00	2022-09-15	08:10:00	166	294	111	24	64	635
zjf003	2022-09-16	2022-09-15	21:16:00	2022-09-16	09:23:00	229	316	91	91	27	663
zjf003	2022-09-17	2022-09-16	22:17:00	2022-09-17	08:08:00	146	314	71	60	82	613
zjf004	2022-04-04	2022-04-03	22:07:00	2022-04-04	07:51:00	199	253	132	0	140	724
zjf004	2022-04-05	2022-04-04	22:35:00	2022-04-05	08:09:00	152	302	87	33	63	604
zjf004	2022-04-06	2022-04-05	22:42:00	2022-04-06	07:41:00	196	206	127	10	91	620
zjf004	2022-04-07	2022-04-07	01:41:00	2022-04-07	08:10:00	109	235	18	27	0	362
zjf004	2022-04-08	2022-04-07	22:31:00	2022-04-08	07:14:00	116	238	123	46	174	651
zjf004	2022-04-09	2022-04-08	21:33:00	2022-04-09	08:09:00	149	381	76	30	51	657
zjf004	2022-04-10	2022-04-09	22:44:00	2022-04-10	08:50:00	150	354	102	0	16	622
zjf004	2022-04-11	2022-04-10	21:39:00	2022-04-11	06:57:00	177	302	79	0	204	762
zjf004	2022-04-12	2022-04-11	22:43:00	2022-04-12	08:16:00	239	210	124	0	66	639
zjf004	2022-04-13	2022-04-12	23:05:00	2022-04-13	07:29:00	94	266	144	0	198	702
zjf004	2022-04-14	2022-04-13	21:59:00	2022-04-14	06:52:00	130	264	139	0	56	589
zjf004	2022-04-15	2022-04-14	22:28:00	2022-04-15	08:01:00	131	313	129	0	56	629
zjf004	2022-04-16	2022-04-15	23:50:00	2022-04-16	08:03:00	129	295	68	1	91	583
zjf004	2022-04-17	2022-04-16	21:47:00	2022-04-17	08:09:00	132	355	93	42	53	633
zjf004	2022-04-18	2022-04-17	22:26:00	2022-04-18	11:46:00	137	409	81	173	0	627
zjf004	2022-04-19	2022-04-18	22:08:00	2022-04-19	06:58:00	125	273	69	63	127	594
zjf004	2022-04-20	2022-04-19	22:52:00	2022-04-20	07:01:00	133	276	69	11	142	620
zjf004	2022-04-21	2022-04-20	23:36:00	2022-04-21	07:37:00	54	288	138	1	56	536
zjf004	2022-04-22	2022-04-21	23:01:00	2022-04-22	06:49:00	67	260	141	0	29	497
zjf004	2022-04-23	2022-04-22	22:12:00	2022-04-23	07:27:00	140	273	123	19	0	536
zjf004	2022-04-24	1970-01-01	08:00:00	2022-04-24	20:00:00	194	326	175	28	5	700
zjf004	2022-04-25	1970-01-01	08:00:00	2022-04-25	06:54:00	204	229	105	116	0	538
zjf004	2022-04-26	2022-04-25	22:17:00	2022-04-26	08:10:00	132	374	51	36	85	642
zjf004	2022-04-27	2022-04-26	22:29:00	2022-04-27	06:43:00	130	228	94	42	157	609
zjf004	2022-04-28	2022-04-27	22:06:00	2022-04-28	07:13:00	135	274	112	26	72	593
zjf004	2022-04-29	2022-04-28	23:34:00	2022-04-29	07:22:00	157	189	121	1	211	678
zjf004	2022-04-30	2022-04-29	21:58:00	2022-04-30	08:09:00	118	373	75	45	0	566
zjf004	2022-04-30	2022-04-29	21:58:00	2022-04-30	08:09:00	118	373	75	45	0	566
zjf004	2022-05-01	2022-04-30	22:42:00	2022-05-01	10:49:00	241	311	164	11	0	716
zjf004	2022-05-02	2022-05-01	21:30:00	2022-05-02	07:11:00	136	345	100	0	130	711
zjf004	2022-05-03	2022-05-02	22:25:00	2022-05-03	08:09:00	119	318	97	50	46	580
zjf004	2022-05-04	2022-05-03	22:35:00	2022-05-04	08:45:00	158	352	92	8	0	602
zjf004	2022-05-05	2022-05-04	22:58:00	2022-05-05	07:29:00	134	295	82	0	82	593
zjf004	2022-05-06	2022-05-05	22:19:00	2022-05-06	09:29:00	184	361	125	0	57	727
zjf004	2022-05-07	2022-05-06	22:48:00	2022-05-07	07:23:00	146	296	73	0	54	569
zjf004	2022-05-08	2022-05-07	22:28:00	2022-05-08	10:59:00	207	384	158	2	64	813
zjf004	2022-05-09	2022-05-08	22:23:00	2022-05-09	07:06:00	140	253	85	45	175	653
zjf004	2022-05-10	2022-05-09	21:48:00	2022-05-10	07:33:00	199	241	145	0	82	667
zjf004	2022-05-11	2022-05-10	21:57:00	2022-05-11	10:50:00	186	409	128	50	0	723
zjf004	2022-05-12	2022-05-11	22:53:00	2022-05-12	07:32:00	119	282	115	3	82	598
zjf004	2022-05-13	2022-05-12	22:13:00	2022-05-13	07:09:00	200	209	121	6	24	554
zjf004	2022-05-14	2022-05-13	22:03:00	2022-05-14	07:32:00	129	257	178	5	90	654
zjf004	2022-05-15	2022-05-14	23:13:00	2022-05-15	11:14:00	150	429	142	0	0	721
zjf004	2022-05-16	2022-05-15	22:10:00	2022-05-16	10:49:00	109	411	229	10	31	780
zjf004	2022-05-17	2022-05-16	22:16:00	2022-05-17	08:39:00	126	339	105	53	105	675
zjf004	2022-05-18	2022-05-17	21:19:00	2022-05-18	10:31:00	202	425	141	24	53	821
zjf004	2022-05-19	2022-05-18	21:54:00	2022-05-19	08:38:00	139	351	113	41	0	603
zjf004	2022-05-20	2022-05-19	22:27:00	2022-05-20	08:44:00	138	361	118	0	23	640
zjf004	2022-05-21	2022-05-20	23:09:00	2022-05-21	08:41:00	143	327	69	33	61	600
zjf004	2022-05-22	2022-05-21	22:08:00	2022-05-22	11:23:00	307	316	172	0	0	795
zjf004	2022-05-23	2022-05-22	22:26:00	2022-05-23	05:56:00	126	265	59	0	219	669
zjf004	2022-05-24	2022-05-23	21:55:00	2022-05-24	07:31:00	172	245	159	0	93	669
zjf004	2022-05-25	2022-05-24	21:35:00	2022-05-25	07:49:00	199	332	81	2	86	698
zjf004	2022-05-27	2022-05-26	22:06:00	2022-05-27	09:19:00	200	294	179	0	43	716
zjf004	2022-05-28	2022-05-27	22:58:00	2022-05-28	08:09:00	118	304	97	32	0	519
zjf004	2022-05-29	2022-05-28	22:36:00	2022-05-29	11:10:00	154	457	143	0	104	858
zjf004	2022-05-30	2022-05-29	23:57:00	2022-05-30	09:21:00	127	339	92	6	96	654
zjf004	2022-05-31	2022-05-30	22:20:00	2022-05-31	07:29:00	54	351	141	3	57	603
zjf004	2022-05-31	2022-05-30	22:20:00	2022-05-31	07:29:00	54	351	141	3	57	603
zjf004	2022-06-01	2022-05-31	21:51:00	2022-06-01	07:31:00	107	376	97	0	76	656
zjf004	2022-06-02	2022-06-01	22:41:00	2022-06-02	07:30:00	110	331	88	0	0	529
zjf004	2022-06-03	2022-06-02	22:28:00	2022-06-03	10:51:00	181	380	182	0	0	743
zjf004	2022-06-04	2022-06-03	22:38:00	2022-06-04	07:45:00	124	303	120	0	58	605
zjf004	2022-06-05	2022-06-04	22:41:00	2022-06-05	10:09:00	174	368	146	0	0	688
zjf004	2022-06-06	2022-06-05	22:06:00	2022-06-06	10:33:00	178	420	149	0	42	789
zjf004	2022-06-07	2022-06-06	22:06:00	2022-06-07	08:39:00	199	257	129	48	0	585
zjf004	2022-06-08	2022-06-07	22:16:00	2022-06-08	10:07:00	199	321	191	0	53	764
zjf004	2022-06-09	2022-06-08	22:01:00	2022-06-09	08:37:00	132	341	110	53	0	583
zjf004	2022-06-10	2022-06-09	22:38:00	2022-06-10	08:09:00	119	334	118	0	128	699
zjf004	2022-06-11	2022-06-10	22:50:00	2022-06-11	07:31:00	141	231	145	4	0	517
zjf004	2022-06-12	2022-06-11	22:36:00	2022-06-12	10:18:00	177	441	76	8	0	694
zjf004	2022-06-13	2022-06-12	21:32:00	2022-06-13	10:49:00	203	358	228	8	74	863
zjf004	2022-06-14	2022-06-13	22:02:00	2022-06-14	08:52:00	143	341	102	64	146	732
zjf004	2022-06-15	2022-06-14	22:08:00	2022-06-15	09:50:00	146	401	151	4	0	698
zjf004	2022-06-16	2022-06-15	22:55:00	2022-06-16	09:56:00	161	411	81	8	111	764
zjf004	2022-06-17	2022-06-16	22:38:00	2022-06-17	10:06:00	186	412	90	0	44	732
zjf004	2022-06-18	2022-06-17	22:15:00	2022-06-18	07:34:00	132	313	114	0	0	559
zjf004	2022-06-19	2022-06-18	21:23:00	2022-06-19	12:01:00	207	521	150	0	0	878
zjf004	2022-06-20	2022-06-19	21:59:00	2022-06-20	08:09:00	132	346	101	31	0	579
zjf004	2022-06-21	2022-06-20	21:58:00	2022-06-21	07:32:00	146	326	102	0	0	574
zjf004	2022-06-22	2022-06-22	00:12:00	2022-06-22	07:31:00	89	281	69	0	39	478
zjf004	2022-06-23	2022-06-22	22:56:00	2022-06-23	08:44:00	91	348	100	49	0	539
zjf004	2022-06-24	2022-06-23	21:55:00	2022-06-24	07:15:00	121	289	150	0	0	560
zjf004	2022-06-25	2022-06-24	21:39:00	2022-06-25	07:32:00	110	298	185	0	0	593
zjf004	2022-06-26	2022-06-25	21:50:00	2022-06-26	14:08:00	173	656	149	0	0	978
zjf004	2022-06-27	2022-06-26	20:12:00	2022-06-27	07:31:00	184	282	140	73	0	606
zjf004	2022-06-28	2022-06-27	21:19:00	2022-06-28	07:33:00	176	283	152	3	0	611
zjf004	2022-06-29	2022-06-28	22:08:00	2022-06-29	10:11:00	154	438	131	0	41	764
zjf004	2022-06-30	2022-06-29	21:39:00	2022-06-30	07:58:00	141	361	117	0	0	619
zjf004	2022-06-30	2022-06-29	21:39:00	2022-06-30	07:58:00	141	361	117	0	0	619
zjf004	2022-07-01	2022-06-30	21:40:00	2022-07-01	08:31:00	186	292	168	5	0	646
zjf004	2022-07-02	2022-07-01	21:34:00	2022-07-02	07:31:00	159	303	135	0	0	597
zjf004	2022-07-03	2022-07-02	22:34:00	2022-07-03	12:34:00	197	445	198	0	0	840
zjf004	2022-07-04	2022-07-03	21:53:00	2022-07-04	07:31:00	132	299	147	0	0	578
zjf004	2022-07-05	2022-07-04	21:26:00	2022-07-05	08:00:00	149	407	74	4	0	630
zjf004	2022-07-06	2022-07-05	21:58:00	2022-07-06	10:47:00	120	427	211	11	45	803
zjf004	2022-07-07	2022-07-06	21:34:00	2022-07-07	08:39:00	163	297	151	54	0	611
zjf004	2022-07-08	2022-07-07	22:44:00	2022-07-08	08:39:00	174	261	122	38	13	570
zjf004	2022-07-09	2022-07-08	22:20:00	2022-07-09	08:01:00	162	281	138	0	0	581
zjf004	2022-07-10	2022-07-09	22:31:00	2022-07-10	12:42:00	140	524	167	20	0	831
zjf004	2022-07-11	2022-07-10	21:59:00	2022-07-11	07:48:00	198	261	125	5	0	584
zjf004	2022-07-12	2022-07-11	21:32:00	2022-07-12	08:09:00	155	310	127	45	0	592
zjf004	2022-07-13	2022-07-12	21:50:00	2022-07-13	10:44:00	180	430	164	0	52	826
zjf004	2022-07-14	2022-07-13	21:20:00	2022-07-14	07:29:00	212	280	117	0	0	609
zjf004	2022-07-15	2022-07-14	21:06:00	2022-07-15	08:38:00	152	358	125	57	51	686
zjf004	2022-07-16	2022-07-15	20:47:00	2022-07-16	08:00:00	168	426	79	0	0	673
zjf004	2022-07-17	2022-07-16	22:40:00	2022-07-17	11:42:00	121	524	132	5	0	777
zjf004	2022-07-18	2022-07-17	22:12:00	2022-07-18	07:32:00	152	266	142	0	0	560
zjf004	2022-07-19	2022-07-18	22:16:00	2022-07-19	07:53:00	144	328	105	0	0	577
zjf004	2022-07-20	2022-07-19	22:03:00	2022-07-20	10:54:00	173	433	165	0	0	771
zjf004	2022-07-21	2022-07-20	22:10:00	2022-07-21	07:01:00	150	269	112	0	0	531
zjf004	2022-07-22	2022-07-21	21:52:00	2022-07-22	08:27:00	132	375	128	0	41	676
zjf004	2022-07-23	2022-07-22	22:02:00	2022-07-23	07:29:00	130	301	136	0	0	567
zjf004	2022-07-24	2022-07-23	22:01:00	2022-07-24	11:31:00	185	494	131	0	0	810
zjf004	2022-07-25	2022-07-24	21:45:00	2022-07-25	07:29:00	150	325	109	0	0	584
zjf004	2022-07-26	2022-07-25	21:22:00	2022-07-26	07:31:00	204	282	123	0	0	609
zjf004	2022-07-27	2022-07-26	22:40:00	2022-07-27	10:03:00	151	405	127	0	0	683
zjf004	2022-07-28	2022-07-27	22:15:00	2022-07-28	07:33:00	171	241	146	0	0	558
zjf004	2022-07-29	2022-07-28	21:58:00	2022-07-29	08:24:00	155	377	93	1	0	625
zjf004	2022-07-30	2022-07-29	21:31:00	2022-07-30	07:30:00	122	307	170	0	0	599
zjf004	2022-07-31	2022-07-30	21:56:00	2022-07-31	09:32:00	202	317	173	4	0	692
zjf004	2022-07-31	2022-07-30	21:56:00	2022-07-31	09:32:00	202	317	173	4	0	692
zjf004	2022-08-01	2022-07-31	21:35:00	2022-08-01	07:33:00	214	261	119	4	0	594
zjf004	2022-08-02	2022-08-01	21:48:00	2022-08-02	07:32:00	106	298	172	8	0	576
zjf004	2022-08-03	2022-08-02	21:29:00	2022-08-03	07:58:00	194	282	153	0	0	629
zjf004	2022-08-04	2022-08-03	21:35:00	2022-08-04	07:59:00	160	362	102	0	0	624
zjf004	2022-08-05	2022-08-04	21:32:00	2022-08-05	07:59:00	162	350	115	0	0	627
zjf004	2022-08-06	2022-08-05	21:23:00	2022-08-06	07:59:00	218	289	129	0	0	636
zjf004	2022-08-07	2022-08-06	22:25:00	2022-08-07	10:46:00	229	418	74	20	0	721
zjf004	2022-08-08	2022-08-07	21:51:00	2022-08-08	07:29:00	132	274	172	0	0	578
zjf004	2022-08-09	2022-08-08	22:13:00	2022-08-09	07:25:00	112	327	113	0	0	552
zjf004	2022-08-10	2022-08-09	22:03:00	2022-08-10	09:09:00	152	347	167	0	0	666
zjf004	2022-08-11	2022-08-10	21:46:00	2022-08-11	07:31:00	167	286	132	0	0	585
zjf004	2022-08-12	2022-08-11	22:35:00	2022-08-12	07:36:00	183	247	111	0	0	541
zjf004	2022-08-13	2022-08-12	21:33:00	2022-08-13	08:04:00	128	376	127	0	0	631
zjf004	2022-08-14	2022-08-13	21:59:00	2022-08-14	10:32:00	216	357	180	0	101	854
zjf004	2022-08-15	2022-08-14	22:07:00	2022-08-15	08:30:00	137	357	71	58	0	565
zjf004	2022-08-16	2022-08-15	21:31:00	2022-08-16	07:33:00	141	339	122	0	0	602
zjf004	2022-08-17	2022-08-16	22:03:00	2022-08-17	09:48:00	184	327	194	0	102	807
zjf004	2022-08-18	2022-08-17	21:40:00	2022-08-18	08:01:00	175	285	161	0	0	621
zjf004	2022-08-19	2022-08-18	21:46:00	2022-08-19	08:04:00	165	289	163	1	0	617
zjf004	2022-08-20	2022-08-19	22:23:00	2022-08-20	07:27:00	88	286	170	0	0	544
zjf004	2022-08-21	2022-08-20	23:07:00	2022-08-21	09:59:00	120	354	178	0	0	652
zjf004	2022-08-22	2022-08-21	21:58:00	2022-08-22	07:29:00	186	252	133	0	0	571
zjf004	2022-08-23	2022-08-22	21:27:00	2022-08-23	07:13:00	143	318	125	0	0	586
zjf004	2022-08-24	2022-08-23	21:52:00	2022-08-24	07:22:00	186	276	108	0	228	798
zjf004	2022-08-25	2022-08-24	21:53:00	2022-08-25	07:29:00	135	305	136	0	0	576
zjf004	2022-08-26	2022-08-25	21:46:00	2022-08-26	10:11:00	171	428	143	3	70	812
zjf004	2022-08-27	2022-08-26	22:39:00	2022-08-27	08:06:00	119	327	121	0	0	567
zjf004	2022-08-28	2022-08-27	21:32:00	2022-08-28	09:13:00	173	398	126	4	0	697
zjf004	2022-08-29	2022-08-28	22:04:00	2022-08-29	07:30:00	216	223	123	4	0	562
zjf004	2022-08-30	2022-08-29	21:52:00	2022-08-30	08:02:00	135	367	105	3	0	607
zjf004	2022-08-31	2022-08-30	23:36:00	2022-08-31	06:48:00	85	239	108	0	155	587
zjf004	2022-08-31	2022-08-30	23:36:00	2022-08-31	06:48:00	85	239	108	0	155	587
zjf004	2022-09-01	2022-08-31	23:29:00	2022-09-01	06:11:00	105	194	102	1	0	401
zjf004	2022-09-02	2022-09-01	22:09:00	2022-09-02	07:09:00	155	313	72	0	69	609
zjf004	2022-09-03	2022-09-02	23:05:00	2022-09-03	07:19:00	137	265	88	4	50	540
zjf004	2022-09-07	2022-09-06	23:48:00	2022-09-07	09:56:00	235	245	128	0	0	608
zjf004	2022-09-08	2022-09-07	23:41:00	2022-09-08	10:23:00	147	325	157	13	0	629
zjf004	2022-09-09	2022-09-09	01:22:00	2022-09-09	11:02:00	155	274	151	0	0	580
zjf004	2022-09-14	2022-09-13	23:32:00	2022-09-14	06:51:00	122	216	101	0	167	606
zjf004	2022-09-15	2022-09-14	21:13:00	2022-09-15	08:10:00	167	307	151	32	0	625
zjf004	2022-09-16	2022-09-15	21:38:00	2022-09-16	09:43:00	146	457	122	0	0	725
zjf004	2022-09-17	2022-09-16	21:31:00	2022-09-17	07:53:00	174	303	145	0	0	622
zjf004	2022-09-18	2022-09-17	22:13:00	2022-09-18	10:55:00	273	333	156	0	0	762
zjf004	2022-09-19	2022-09-18	21:46:00	2022-09-19	10:39:00	201	345	171	56	73	790
zjf005	2022-04-04	2022-04-04	01:52:00	2022-04-04	09:32:00	130	230	91	9	26	477
zjf005	2022-04-05	2022-04-04	23:03:00	2022-04-05	07:36:00	192	176	94	51	101	563
zjf005	2022-04-06	2022-04-05	23:43:00	2022-04-06	08:39:00	142	260	105	29	133	640
zjf005	2022-04-07	2022-04-06	22:57:00	2022-04-07	07:41:00	136	259	92	37	0	487
zjf005	2022-04-08	2022-04-07	22:48:00	2022-04-08	07:00:00	155	210	127	0	101	593
zjf005	2022-04-09	2022-04-08	22:13:00	2022-04-09	07:04:00	156	244	129	2	47	576
zjf005	2022-04-10	2022-04-09	23:07:00	2022-04-10	08:50:00	143	324	107	9	0	574
zjf005	2022-04-11	2022-04-10	22:35:00	2022-04-11	12:40:00	236	360	180	0	0	776
zjf005	2022-04-12	2022-04-11	22:43:00	2022-04-12	08:16:00	239	210	124	0	66	639
zjf005	2022-04-13	2022-04-12	23:15:00	2022-04-13	11:28:00	188	352	170	23	0	710
zjf005	2022-04-14	2022-04-13	21:01:00	2022-04-14	07:32:00	132	394	102	3	55	683
zjf005	2022-04-15	2022-04-14	23:53:00	2022-04-15	07:11:00	156	181	101	0	0	438
zjf005	2022-04-16	2022-04-15	22:49:00	2022-04-16	07:53:00	141	305	88	10	93	627
zjf005	2022-04-17	2022-04-16	22:40:00	2022-04-17	07:06:00	117	289	100	0	52	558
zjf005	2022-04-18	2022-04-17	22:27:00	2022-04-18	06:59:00	141	293	74	4	0	508
zjf005	2022-04-19	2022-04-18	22:16:00	2022-04-19	06:58:00	134	280	73	35	100	587
zjf005	2022-04-20	2022-04-19	23:13:00	2022-04-20	07:02:00	100	242	117	10	0	459
zjf005	2022-04-21	2022-04-20	22:43:00	2022-04-21	08:11:00	142	325	76	25	43	586
zjf005	2022-04-22	2022-04-21	23:38:00	2022-04-22	07:23:00	190	189	86	0	0	465
zjf005	2022-04-23	2022-04-22	23:09:00	2022-04-23	06:50:00	110	258	93	0	0	461
zjf005	2022-04-24	2022-04-23	23:47:00	2022-04-24	09:50:00	159	331	94	19	0	584
zjf005	2022-04-25	2022-04-24	22:39:00	2022-04-25	07:05:00	101	267	134	4	0	502
zjf005	2022-04-26	2022-04-25	22:45:00	2022-04-26	06:50:00	116	222	147	0	0	485
zjf005	2022-04-27	2022-04-26	23:07:00	2022-04-27	07:08:00	134	289	58	0	0	481
zjf005	2022-04-28	2022-04-27	22:23:00	2022-04-28	07:00:00	60	355	101	1	74	590
zjf005	2022-04-29	2022-04-28	23:26:00	2022-04-29	07:10:00	80	238	146	0	0	464
zjf005	2022-04-30	2022-04-29	21:55:00	2022-04-30	07:40:00	151	314	91	29	0	556
zjf005	2022-04-30	2022-04-29	21:55:00	2022-04-30	07:40:00	151	314	91	29	0	556
zjf005	2022-05-01	2022-04-30	22:28:00	2022-05-01	09:44:00	136	408	99	33	0	643
zjf005	2022-05-02	2022-05-01	22:02:00	2022-05-02	07:00:00	160	225	127	26	0	512
zjf005	2022-05-03	2022-05-02	22:41:00	2022-05-03	08:09:00	117	275	136	40	0	528
zjf005	2022-05-04	2022-05-03	22:33:00	2022-05-04	07:11:00	151	237	129	1	0	517
zjf005	2022-05-05	2022-05-04	22:40:00	2022-05-05	06:31:00	116	213	139	3	78	546
zjf005	2022-05-06	2022-05-05	22:32:00	2022-05-06	06:56:00	143	221	140	0	0	504
zjf005	2022-05-07	2022-05-06	23:18:00	2022-05-07	07:00:00	78	316	67	1	53	514
zjf005	2022-05-08	2022-05-07	22:23:00	2022-05-08	07:48:00	124	349	67	25	0	540
zjf005	2022-05-09	2022-05-08	22:21:00	2022-05-09	06:50:00	161	212	134	2	0	507
zjf005	2022-05-10	2022-05-09	22:18:00	2022-05-10	07:09:00	139	286	106	0	110	641
zjf005	2022-05-11	2022-05-10	23:11:00	2022-05-11	07:00:00	125	244	87	13	0	456
zjf005	2022-05-12	2022-05-11	22:51:00	2022-05-12	06:50:00	173	181	125	0	42	521
zjf005	2022-05-13	2022-05-12	22:27:00	2022-05-13	06:50:00	174	208	121	0	0	503
zjf005	2022-05-14	2022-05-13	23:04:00	2022-05-14	06:55:00	133	205	133	0	35	506
zjf005	2022-05-15	2022-05-14	22:16:00	2022-05-15	10:05:00	129	363	175	42	0	667
zjf005	2022-05-16	2022-05-15	22:19:00	2022-05-16	06:58:00	139	315	65	0	0	519
zjf005	2022-05-17	2022-05-16	22:59:00	2022-05-17	07:04:00	183	256	45	1	54	538
zjf005	2022-05-18	2022-05-17	22:02:00	2022-05-18	06:59:00	129	299	92	17	0	520
zjf005	2022-05-19	2022-05-18	22:44:00	2022-05-19	07:00:00	159	218	93	26	60	530
zjf005	2022-05-20	2022-05-19	22:57:00	2022-05-20	07:09:00	156	227	109	0	0	492
zjf005	2022-05-21	2022-05-20	23:07:00	2022-05-21	07:07:00	148	202	130	0	0	480
zjf005	2022-05-22	2022-05-21	22:37:00	2022-05-22	10:15:00	167	342	161	28	0	670
zjf005	2022-05-23	2022-05-22	22:46:00	2022-05-23	06:02:00	124	203	102	7	0	429
zjf005	2022-05-24	2022-05-23	21:58:00	2022-05-24	06:54:00	159	230	147	0	93	629
zjf005	2022-05-25	2022-05-24	22:27:00	2022-05-25	07:10:00	162	265	96	0	0	523
zjf005	2022-05-27	2022-05-26	22:07:00	2022-05-27	07:21:00	178	240	135	1	0	553
zjf005	2022-05-28	2022-05-27	22:38:00	2022-05-28	07:00:00	118	309	75	0	0	502
zjf005	2022-05-29	2022-05-28	23:18:00	2022-05-29	10:21:00	152	279	180	52	0	611
zjf005	2022-05-30	2022-05-29	22:36:00	2022-05-30	06:55:00	148	224	126	1	0	498
zjf005	2022-05-31	2022-05-30	23:13:00	2022-05-31	07:03:00	146	215	109	0	0	470
zjf005	2022-05-31	2022-05-30	23:13:00	2022-05-31	07:03:00	146	215	109	0	0	470
zjf005	2022-06-01	2022-05-31	20:46:00	2022-06-01	09:19:00	198	399	117	39	0	714
zjf005	2022-06-02	2022-06-01	21:57:00	2022-06-02	07:01:00	138	318	75	13	0	531
zjf005	2022-06-03	2022-06-02	23:19:00	2022-06-03	07:37:00	134	291	49	24	0	474
zjf005	2022-06-04	2022-06-03	23:16:00	2022-06-04	06:55:00	111	280	67	1	0	458
zjf005	2022-06-05	2022-06-04	23:18:00	2022-06-05	09:07:00	161	279	106	43	0	546
zjf005	2022-06-08	2022-06-07	22:15:00	2022-06-08	07:06:00	117	346	65	3	0	528
zjf005	2022-06-09	2022-06-08	22:57:00	2022-06-09	07:26:00	173	211	124	1	65	573
zjf005	2022-06-10	2022-06-09	22:35:00	2022-06-10	06:47:00	120	288	84	0	0	492
zjf005	2022-06-11	2022-06-10	22:44:00	2022-06-11	06:16:00	125	235	84	8	0	444
zjf005	2022-06-12	2022-06-11	23:30:00	2022-06-12	08:35:00	130	237	156	22	0	523
zjf005	2022-06-13	2022-06-12	22:38:00	2022-06-13	07:06:00	183	216	109	0	0	508
zjf005	2022-06-14	2022-06-13	22:39:00	2022-06-14	07:00:00	131	237	133	0	0	501
zjf005	2022-06-15	2022-06-14	22:13:00	2022-06-15	07:15:00	195	234	91	22	0	520
zjf005	2022-06-16	2022-06-15	23:38:00	2022-06-16	07:15:00	137	235	85	0	0	457
zjf005	2022-06-17	2022-06-16	22:56:00	2022-06-17	07:55:00	150	328	36	25	0	514
zjf005	2022-06-18	2022-06-17	22:35:00	2022-06-18	07:15:00	122	288	48	62	68	526
zjf005	2022-06-19	2022-06-18	22:59:00	2022-06-19	12:05:00	209	424	138	15	0	771
zjf005	2022-06-20	2022-06-19	22:47:00	2022-06-20	08:11:00	170	264	84	46	0	518
zjf005	2022-06-22	2022-06-21	22:37:00	2022-06-22	06:53:00	104	297	94	1	0	495
zjf005	2022-06-23	2022-06-22	23:00:00	2022-06-23	06:45:00	76	318	71	0	86	551
zjf005	2022-06-24	2022-06-23	22:45:00	2022-06-24	06:59:00	121	277	92	4	0	490
zjf005	2022-06-25	2022-06-24	22:48:00	2022-06-25	08:05:00	129	305	75	48	61	570
zjf005	2022-06-26	2022-06-25	22:01:00	2022-06-26	08:42:00	163	359	119	0	0	641
zjf005	2022-06-27	2022-06-26	21:26:00	2022-06-27	07:33:00	175	357	71	4	0	603
zjf005	2022-06-28	2022-06-27	21:48:00	2022-06-28	07:24:00	162	263	140	11	0	565
zjf005	2022-06-29	2022-06-28	22:01:00	2022-06-29	06:43:00	111	330	81	0	0	522
zjf005	2022-06-30	2022-06-29	22:42:00	2022-06-30	06:46:00	111	306	67	0	0	484
zjf005	2022-06-30	2022-06-29	22:42:00	2022-06-30	06:46:00	111	306	67	0	0	484
zjf005	2022-07-01	2022-06-30	23:13:00	2022-07-01	06:46:00	116	281	52	4	0	449
zjf005	2022-07-02	2022-07-01	22:51:00	2022-07-02	06:41:00	107	272	90	1	48	517
zjf005	2022-07-05	2022-07-04	21:42:00	2022-07-05	06:40:00	179	237	122	0	0	538
zjf005	2022-07-06	2022-07-05	22:12:00	2022-07-06	07:27:00	197	210	120	28	0	527
zjf005	2022-07-07	2022-07-06	22:18:00	2022-07-07	06:45:00	123	253	87	44	0	463
zjf005	2022-07-08	2022-07-07	21:48:00	2022-07-08	06:49:00	117	243	126	55	0	486
zjf005	2022-07-09	2022-07-08	22:44:00	2022-07-09	07:30:00	186	211	102	27	0	499
zjf005	2022-07-10	2022-07-10	01:28:00	2022-07-10	11:31:00	214	221	150	18	0	585
zjf005	2022-07-11	2022-07-10	21:41:00	2022-07-11	07:40:00	156	262	102	79	0	520
zjf005	2022-07-12	2022-07-11	21:23:00	2022-07-12	07:02:00	114	294	160	11	0	568
zjf005	2022-07-13	2022-07-12	22:27:00	2022-07-13	06:57:00	53	322	135	0	158	668
zjf005	2022-07-14	2022-07-13	22:14:00	2022-07-14	06:52:00	117	325	76	0	0	518
zjf005	2022-07-15	2022-07-14	21:58:00	2022-07-15	06:54:00	124	320	92	0	0	536
zjf005	2022-07-16	2022-07-15	22:25:00	2022-07-16	06:50:00	133	338	34	0	49	554
zjf005	2022-07-17	2022-07-16	22:39:00	2022-07-17	11:24:00	109	543	108	5	0	760
zjf005	2022-07-20	2022-07-19	22:34:00	2022-07-20	06:42:00	108	251	114	15	0	473
zjf005	2022-07-21	2022-07-20	22:49:00	2022-07-21	06:43:00	95	295	84	0	0	474
zjf005	2022-07-22	2022-07-21	21:52:00	2022-07-22	08:10:00	161	323	105	29	0	589
zjf005	2022-07-23	2022-07-22	22:12:00	2022-07-23	07:28:00	122	288	93	53	0	503
zjf005	2022-07-24	2022-07-23	21:38:00	2022-07-24	11:26:00	216	440	167	5	0	823
zjf005	2022-07-25	2022-07-24	21:06:00	2022-07-25	08:10:00	160	324	100	80	0	584
zjf005	2022-07-26	2022-07-25	22:26:00	2022-07-26	07:30:00	137	305	91	11	0	533
zjf005	2022-07-27	2022-07-26	22:24:00	2022-07-27	06:36:00	166	233	93	0	0	492
zjf005	2022-07-28	2022-07-27	22:11:00	2022-07-28	07:46:00	208	226	141	0	0	575
zjf005	2022-07-29	2022-07-28	23:25:00	2022-07-29	08:40:00	161	245	144	5	0	550
zjf005	2022-07-30	2022-07-29	21:53:00	2022-07-30	07:48:00	217	231	129	18	0	577
zjf005	2022-07-31	2022-07-30	23:43:00	2022-07-31	03:02:00	55	117	27	0	0	199
zjf005	2022-07-31	2022-07-30	23:43:00	2022-07-31	03:02:00	55	117	27	0	0	199
zjf005	2022-08-01	2022-07-31	21:56:00	2022-08-01	07:29:00	143	275	146	9	0	564
zjf005	2022-08-02	2022-08-01	21:20:00	2022-08-02	06:48:00	157	244	119	48	0	520
zjf005	2022-08-04	2022-08-03	22:00:00	2022-08-04	06:47:00	136	243	114	34	0	493
zjf005	2022-08-05	2022-08-04	21:29:00	2022-08-05	05:55:00	138	242	88	38	0	468
zjf005	2022-08-06	2022-08-05	22:42:00	2022-08-06	07:12:00	139	322	47	2	0	508
zjf005	2022-08-07	2022-08-06	22:39:00	2022-08-07	07:07:00	126	248	98	36	0	472
zjf006	2022-04-04	2022-04-03	22:40:00	2022-04-04	06:46:00	150	223	102	11	56	531
zjf006	2022-04-05	2022-04-04	20:39:00	2022-04-05	06:55:00	236	237	120	23	122	715
zjf006	2022-04-06	2022-04-05	22:20:00	2022-04-06	08:39:00	151	367	101	0	0	619
zjf006	2022-04-07	2022-04-06	23:30:00	2022-04-07	07:04:00	90	250	114	0	45	499
zjf006	2022-04-08	2022-04-07	22:52:00	2022-04-08	07:14:00	108	203	120	71	42	473
zjf006	2022-04-09	2022-04-08	22:51:00	2022-04-09	05:31:00	155	152	82	11	37	426
zjf006	2022-04-10	2022-04-09	22:36:00	2022-04-10	08:50:00	161	367	82	4	0	610
zjf006	2022-04-11	2022-04-10	22:42:00	2022-04-11	07:16:00	174	223	105	12	56	558
zjf006	2022-04-12	2022-04-11	22:46:00	2022-04-12	07:10:00	194	209	101	0	73	577
zjf006	2022-04-13	2022-04-12	22:30:00	2022-04-13	06:53:00	142	301	28	32	117	588
zjf006	2022-04-14	2022-04-13	22:24:00	2022-04-14	06:57:00	195	239	55	24	44	533
zjf006	2022-04-15	2022-04-14	23:54:00	2022-04-15	07:11:00	96	225	116	0	32	469
zjf006	2022-04-16	2022-04-15	22:39:00	2022-04-16	07:32:00	135	269	99	30	97	600
zjf006	2022-04-17	2022-04-16	22:38:00	2022-04-17	06:52:00	157	237	100	0	53	547
zjf006	2022-04-18	2022-04-17	23:10:00	2022-04-18	06:45:00	98	202	46	109	66	412
zjf006	2022-04-19	2022-04-18	22:58:00	2022-04-19	06:43:00	117	231	88	29	80	516
zjf006	2022-04-20	2022-04-19	22:44:00	2022-04-20	06:16:00	110	212	130	0	62	514
zjf006	2022-04-21	2022-04-20	22:52:00	2022-04-21	06:44:00	133	273	66	0	52	524
zjf006	2022-04-22	2022-04-21	23:06:00	2022-04-22	06:41:00	156	194	105	0	59	514
zjf006	2022-04-23	2022-04-22	22:43:00	2022-04-23	07:28:00	135	251	124	15	76	586
zjf006	2022-04-24	2022-04-23	22:22:00	2022-04-24	09:07:00	117	334	139	55	33	623
zjf006	2022-04-25	2022-04-25	00:12:00	2022-04-25	07:05:00	128	235	39	11	95	497
zjf006	2022-04-26	2022-04-25	22:13:00	2022-04-26	07:02:00	118	271	138	2	27	554
zjf006	2022-04-27	2022-04-26	23:07:00	2022-04-27	07:08:00	110	289	82	0	99	580
zjf006	2022-04-28	2022-04-27	22:07:00	2022-04-28	07:13:00	148	289	83	26	74	594
zjf006	2022-04-29	2022-04-28	23:29:00	2022-04-29	07:11:00	176	174	92	20	0	442
zjf006	2022-04-29	2022-04-28	23:29:00	2022-04-29	07:11:00	176	174	92	20	0	442
zjf006	2022-04-30	2022-04-29	22:47:00	2022-04-30	06:43:00	138	236	91	11	28	493
zjf006	2022-05-01	2022-04-30	21:28:00	2022-05-01	07:53:00	133	435	40	17	113	721
zjf006	2022-05-02	2022-05-01	22:19:00	2022-05-02	06:45:00	132	280	73	21	18	503
zjf006	2022-05-03	2022-05-02	22:29:00	2022-05-03	06:55:00	181	230	95	0	30	536
zjf006	2022-05-04	2022-05-03	23:44:00	2022-05-04	06:42:00	130	227	49	12	0	406
zjf006	2022-05-05	2022-05-04	22:56:00	2022-05-05	07:06:00	102	353	35	0	25	515
zjf006	2022-05-06	2022-05-05	23:06:00	2022-05-06	07:22:00	104	318	74	0	24	520
zjf006	2022-05-07	2022-05-06	22:58:00	2022-05-07	07:08:00	169	259	55	7	42	525
zjf006	2022-05-08	2022-05-07	23:29:00	2022-05-08	08:47:00	101	278	176	3	0	555
zjf006	2022-05-09	2022-05-08	22:35:00	2022-05-09	07:03:00	146	283	79	0	20	528
zjf006	2022-05-10	2022-05-09	23:45:00	2022-05-10	07:02:00	121	235	81	0	61	498
zjf006	2022-05-11	2022-05-10	22:35:00	2022-05-11	07:05:00	179	192	94	45	37	502
zjf006	2022-05-12	2022-05-11	23:20:00	2022-05-12	07:08:00	165	262	31	10	67	525
zjf006	2022-05-13	2022-05-12	22:47:00	2022-05-13	07:12:00	106	295	101	3	0	502
zjf006	2022-05-14	2022-05-13	23:01:00	2022-05-14	07:07:00	107	240	136	3	80	563
zjf006	2022-05-15	2022-05-14	22:58:00	2022-05-15	10:05:00	148	341	128	50	0	617
zjf006	2022-05-16	2022-05-15	22:30:00	2022-05-16	07:28:00	127	243	158	10	28	556
zjf006	2022-05-17	2022-05-16	22:00:00	2022-05-17	07:38:00	164	286	115	13	0	565
zjf006	2022-05-18	2022-05-17	22:36:00	2022-05-18	07:06:00	167	202	130	11	70	569
zjf006	2022-05-19	2022-05-18	23:15:00	2022-05-19	07:08:00	133	284	43	13	91	551
zjf006	2022-05-20	2022-05-19	22:03:00	2022-05-20	06:48:00	93	300	111	21	24	528
zjf006	2022-05-21	2022-05-20	22:01:00	2022-05-21	06:56:00	108	264	143	20	34	549
zjf006	2022-05-22	2022-05-21	23:54:00	2022-05-22	10:46:00	177	304	122	49	0	603
zjf006	2022-05-23	2022-05-22	21:49:00	2022-05-23	06:02:00	144	290	47	12	59	540
zjf006	2022-05-24	2022-05-23	22:34:00	2022-05-24	06:58:00	125	225	144	10	46	540
zjf006	2022-05-25	2022-05-24	22:19:00	2022-05-25	07:13:00	77	339	101	17	0	517
zjf006	2022-05-26	2022-05-25	22:09:00	2022-05-26	07:26:00	145	284	116	12	0	545
zjf006	2022-05-27	2022-05-26	21:08:00	2022-05-27	07:24:00	137	351	97	31	21	606
zjf006	2022-05-28	2022-05-27	22:38:00	2022-05-28	07:06:00	87	280	141	0	0	508
zjf006	2022-05-29	2022-05-28	23:03:00	2022-05-29	09:57:00	127	421	106	0	0	654
zjf006	2022-05-30	2022-05-29	23:51:00	2022-05-30	07:25:00	142	191	115	6	79	527
zjf006	2022-05-31	2022-05-30	22:19:00	2022-05-31	07:10:00	141	327	52	11	76	596
zjf006	2022-05-31	2022-05-30	22:19:00	2022-05-31	07:10:00	141	327	52	11	76	596
zjf006	2022-06-01	2022-05-31	22:23:00	2022-06-01	07:26:00	140	266	137	0	98	641
zjf006	2022-06-02	2022-06-01	22:57:00	2022-06-02	07:26:00	125	265	107	12	38	535
zjf006	2022-06-03	2022-06-02	22:28:00	2022-06-03	07:10:00	145	260	111	6	108	624
zjf006	2022-06-05	2022-06-04	22:29:00	2022-06-05	10:38:00	163	423	124	19	0	710
zjf006	2022-06-06	2022-06-05	22:47:00	2022-06-06	07:32:00	194	219	112	0	0	525
zjf006	2022-06-07	2022-06-06	22:23:00	2022-06-07	07:01:00	79	309	69	61	0	457
zjf006	2022-06-08	2022-06-07	22:51:00	2022-06-08	07:09:00	124	306	68	0	80	578
zjf006	2022-06-09	2022-06-08	23:27:00	2022-06-09	07:08:00	83	242	132	4	72	529
zjf006	2022-06-10	2022-06-09	22:07:00	2022-06-10	07:31:00	104	382	78	0	0	564
[truncated: 608 more rows]
